# Supplementary material for: Genome survey sequencing of the Caribbean spiny lobster Panulirus argus: Genome size, nuclear rRNA operon, repetitive elements, and microsatellite discovery
Source: PeerJ. 2020 Dec 17;8:e10554. doi: 10.7717/peerj.10554 (PMC7750000; doi:10.7717/peerj.10554)
Supplement: Supplemental Information 1 [file peerj-08-10554-s001.xls]

## Sheet: .tabular]Galaxy61-[pal_finder_o
	Motifs(bases)	F Primer Name	Forward Primer	R Primer Name	Reverse Primer
1	ACTGT(25)	Panulirus_argus_Forward_Primer_01	TTAAGCAAAAGGCAGCAACG	Panulirus_argus_Reverse_Primer_01	GAAAACATGAAAATTTGATCGTGC	1
2	TCCCG(25)	Panulirus_argus_Forward_Primer_02	CAAGCCCTGAGTGAGCCC	Panulirus_argus_Reverse_Primer_02	GTAGAGGCAGCGTGTGAGGG	2
3	CCGGG(25)	Panulirus_argus_Forward_Primer_03	GCTTCGCCAATTATTGCTCC	Panulirus_argus_Reverse_Primer_03	GGACGGAGCCTGTGAAGC	3
4	CCCGG(25)	Panulirus_argus_Forward_Primer_04	GGACTCCCGAAACTGTCAGC	Panulirus_argus_Reverse_Primer_04	GAGGTGATTAATTGCACCCG	4
5	ATCCC(30)	Panulirus_argus_Forward_Primer_05	GTCGGTGTTGATGGGATGG	Panulirus_argus_Reverse_Primer_05	GTCCATTCACCCACTTGTCG	5
6	TTCCC(35)	Panulirus_argus_Forward_Primer_06	CACTATGCCACCCAGACTCG	Panulirus_argus_Reverse_Primer_06	CTATTATGGACGGGCTGCG	6
7	CCGGG(30)	Panulirus_argus_Forward_Primer_07	GCCGACCACTTGGGTATGG	Panulirus_argus_Reverse_Primer_07	GAGGCATGACCCTCTTCAGC	7
8	AACCT(25)	Panulirus_argus_Forward_Primer_08	GGAGTGCTGCCAATGATAAGC	Panulirus_argus_Reverse_Primer_08	CGCTTGTAGTATTTGCACTGGC	8
9	ACCCG(25)	Panulirus_argus_Forward_Primer_09	CGTCAGGAGAGATTTTGGGC	Panulirus_argus_Reverse_Primer_09	AAGCCAGTCGTCTCTCCCC	9
10	ACAG(20)	Panulirus_argus_Forward_Primer_10	CGTGCACTGTAGAGGTTGAGC	Panulirus_argus_Reverse_Primer_10	GCCATGTCATTTGTGAAGGG	10
11	TCGG(20)	Panulirus_argus_Forward_Primer_11	GAAATGAAGCTTTCCCTCCG	Panulirus_argus_Reverse_Primer_11	ACCACATTAGCATCCGTCCC	11
12	AGGG(32)	Panulirus_argus_Forward_Primer_12	CTCCCTCAACATGTCTCCCC	Panulirus_argus_Reverse_Primer_12	ATGGCACGTTTTCGCTTACC	12
13	CGGG(20)	Panulirus_argus_Forward_Primer_13	TTTATATTCCTCGCAGGTCGG	Panulirus_argus_Reverse_Primer_13	GCAGTGGGGTCTCTTCGC	13
14	ATTT(28)	Panulirus_argus_Forward_Primer_14	GAAACTGTTAATCATATATACCTCCTGC	Panulirus_argus_Reverse_Primer_14	AACAAGATACTAATTCAATCATAGCTGC	1
15	TCCG(20)	Panulirus_argus_Forward_Primer_15	GACTGGTCGAAATGTGGATGC	Panulirus_argus_Reverse_Primer_15	GACAACGGACGTGGGACG	2
16	AGGG(20)	Panulirus_argus_Forward_Primer_16	CTGCACTGATTTTGCCTTCG	Panulirus_argus_Reverse_Primer_16	CCGTGTTAAGGTGATTGACCG	3
17	AGGG(20)	Panulirus_argus_Forward_Primer_17	GGAGAGTCGTCAAGACTTGGG	Panulirus_argus_Reverse_Primer_17	TTCCTGAATCTCCTCTCCCC	4
18	TGGC(20)	Panulirus_argus_Forward_Primer_18	CTGGTGAGTGTTGCCCTGC	Panulirus_argus_Reverse_Primer_18	AACCACTATCAACCACCGTCG	5
19	ATTT(20)	Panulirus_argus_Forward_Primer_19	ACTTGCAGGTACAGCCCAGC	Panulirus_argus_Reverse_Primer_19	TGGTTGTACCTCGCTGATGC	6
20	ACAG(24)	Panulirus_argus_Forward_Primer_20	GACGTTTGGAAATTGAATCACG	Panulirus_argus_Reverse_Primer_20	TCACGACAACTACAGAGCAGAGG	7
21	AAGC(20)	Panulirus_argus_Forward_Primer_21	TCAAAGGGTCGTACAGTCGC	Panulirus_argus_Reverse_Primer_21	CTTGAGTGTGCGGAGGAGG	8
22	AGGG(28)	Panulirus_argus_Forward_Primer_22	TGTGTAGGCTTGGAGTCCCC	Panulirus_argus_Reverse_Primer_22	ACATGCCGATCATAAACCCC	9
23	CCCG(24)	Panulirus_argus_Forward_Primer_23	TTACCACATTCCCAGGAGGC	Panulirus_argus_Reverse_Primer_23	GTACTGTCGTCCTCCCTCCG	10
24	AGGG(20)	Panulirus_argus_Forward_Primer_24	ATGGGAATGCCATATGCACC	Panulirus_argus_Reverse_Primer_24	GTCCTTCAGCTCCTCCCTCC	11
25	AGGG(20)	Panulirus_argus_Forward_Primer_25	TCTGTGAGAGGTTAAGGGAGGC	Panulirus_argus_Reverse_Primer_25	ACCCGTCAACCAGCAACG	12
26	AGGG(20)	Panulirus_argus_Forward_Primer_26	CAACGAGAAACGTTCCAGGC	Panulirus_argus_Reverse_Primer_26	AACACACTTTCATCATGGGTGC	13
27	AGGG(20)	Panulirus_argus_Forward_Primer_27	TATCGGGTGAGGTAGACGGG	Panulirus_argus_Reverse_Primer_27	GACACCGCAAGGGAGAGG	14
28	AGGG(24)	Panulirus_argus_Forward_Primer_28	ATCACTGTCCTACCCTCGGC	Panulirus_argus_Reverse_Primer_28	CATCAGCAGTGGCTGTGTACG	15
29	AGGG(20)	Panulirus_argus_Forward_Primer_29	CATTAAGGCCTTCAGCGTCC	Panulirus_argus_Reverse_Primer_29	GCTTGGCAAGGGACACTACC	16
30	AGGG(20)	Panulirus_argus_Forward_Primer_30	ATCCGCATGAGGTCGAAGG	Panulirus_argus_Reverse_Primer_30	CTAGCCTCCTTGCTCCTCCC	17
31	ACGC(20)	Panulirus_argus_Forward_Primer_31	TCCCGCTACGGTCTAATTCC	Panulirus_argus_Reverse_Primer_31	GGCTGCTTTATCCTCATCCG	18
32	AAGG(24)	Panulirus_argus_Forward_Primer_32	GTCATGCCCCTTCTTTCTGC	Panulirus_argus_Reverse_Primer_32	GGAAGACATAAATCGGGACGG	19
33	ATAG(20)	Panulirus_argus_Forward_Primer_33	CCAAACACTGGCTTAAATGGG	Panulirus_argus_Reverse_Primer_33	TGCAAAGGAAATGAATTTTGG	20
34	ATCT(24)	Panulirus_argus_Forward_Primer_34	TCCGCTTTATGTAAATTGCG	Panulirus_argus_Reverse_Primer_34	TCATGAAACAATTCTTATTGGAGG	21
35	ATAG(36)	Panulirus_argus_Forward_Primer_35	TCCTCTAATTATTGTGACGAATGAGG	Panulirus_argus_Reverse_Primer_35	TCCATCTGTTATCAATCCTGCG	22
36	AGGG(20)	Panulirus_argus_Forward_Primer_36	TGATGACATGCTGTGTTCCG	Panulirus_argus_Reverse_Primer_36	GACTCCTCCCTTCCACCACC	23
37	TCCG(20)	Panulirus_argus_Forward_Primer_37	AAGGACACCTGAGGCAGACG	Panulirus_argus_Reverse_Primer_37	CCCACATACTGGGAACTAGAGGG	24
38	AGGG(24)	Panulirus_argus_Forward_Primer_38	AGATGACTCACAGGCAAGCG	Panulirus_argus_Reverse_Primer_38	GCATCTAATATTCTGCGTCCACC	25
39	ATAG(20)	Panulirus_argus_Forward_Primer_39	AGGGAAGGGAAGGAAAGTGG	Panulirus_argus_Reverse_Primer_39	CAGTAAAGCAACCCTCTGTATGG	26
40	TTGG(20)	Panulirus_argus_Forward_Primer_40	GGACTTCACCCAGATGGTGG	Panulirus_argus_Reverse_Primer_40	ATCCCAAACAAACAGCCTGC	27
41	ATCT(36)	Panulirus_argus_Forward_Primer_41	ATCCGGAATGTTTCATTGGC	Panulirus_argus_Reverse_Primer_41	AGGAATCTAACACGACGGGC	28
42	TTGG(20)	Panulirus_argus_Forward_Primer_42	GTTGGTCTGTGTCTGTGGGG	Panulirus_argus_Reverse_Primer_42	TTGATGACGGTTGATGACGC	29
43	TCTG(20)	Panulirus_argus_Forward_Primer_43	GCTTAGACATTCGGATCCTGC	Panulirus_argus_Reverse_Primer_43	AGCCATCTTCGGACGAGC	30
44	ACCC(20)	Panulirus_argus_Forward_Primer_44	GAGATACAGGGAGGGTTGGG	Panulirus_argus_Reverse_Primer_44	TGGGGTTTTAGACATGGACG	31
45	AGGG(24)	Panulirus_argus_Forward_Primer_45	TATTTTACAACTTTCTTATCACCGC	Panulirus_argus_Reverse_Primer_45	TGCAGTTCTTCTCCATCACG	32
46	ACCG(28)	Panulirus_argus_Forward_Primer_46	CAACCCTGCCACCAAACC	Panulirus_argus_Reverse_Primer_46	CTCGTCCCTCTGGCTACTGG	33
47	TCTG(32)	Panulirus_argus_Forward_Primer_47	GCAGACCGCTGTAGTTCACC	Panulirus_argus_Reverse_Primer_47	GTCATGTCAAGAGGGAGGGG	34
48	AGCC(20)	Panulirus_argus_Forward_Primer_48	AAACAAATGAAGGAGGGAGGC	Panulirus_argus_Reverse_Primer_48	TGGCAAAGGCATACATAACACC	35
49	AGTG(36)	Panulirus_argus_Forward_Primer_49	TCATCTCTCACATTCGTAACCC	Panulirus_argus_Reverse_Primer_49	TTGGAATTTTGCTTTCCAGG	36
50	ACGC(20)	Panulirus_argus_Forward_Primer_50	TCCACTGTATGCAAGCCTCC	Panulirus_argus_Reverse_Primer_50	TCCTTCTCACCAATCCTCCC	37
51	TCTG(20)	Panulirus_argus_Forward_Primer_51	GCAGCCACGTAATGTTTATCG	Panulirus_argus_Reverse_Primer_51	TTCCTCCCTGTTAACCGCC	38
52	ATAG(24)	Panulirus_argus_Forward_Primer_52	GCAGGTGGTTGTTGTAACTGC	Panulirus_argus_Reverse_Primer_52	GTCTGGCACTTCCTGTTTCG	39
53	AGCC(20)	Panulirus_argus_Forward_Primer_53	CAGGTCTTGCGTCATCTCCC	Panulirus_argus_Reverse_Primer_53	AGCCAACCTAGCAACCAACC	40
54	AAGG(36)	Panulirus_argus_Forward_Primer_54	TTTGCCTTTTCTCTTGTTCTCC	Panulirus_argus_Reverse_Primer_54	CACAGATGTGATAAACATTAAGCG	41
55	ATCT(20)	Panulirus_argus_Forward_Primer_55	TCAGGGCAGATGTAACAGAAGG	Panulirus_argus_Reverse_Primer_55	TGTTGTGCTGAACTTTCCCC	42
56	ATAG(24)	Panulirus_argus_Forward_Primer_56	GTTGCCCACCTCATCCCG	Panulirus_argus_Reverse_Primer_56	TCTCTCGAAACTATGCTCTGAGGG	43
57	CGG(18)	Panulirus_argus_Forward_Primer_57	CCACCACCATCGTCTCCG	Panulirus_argus_Reverse_Primer_57	TCACACATAGGAGATAAACGTGAGC	1
58	TCC(18)	Panulirus_argus_Forward_Primer_58	TTCCTAATAATGGCGACACGG	Panulirus_argus_Reverse_Primer_58	GAGGGAGGAGGAAAGACATGG	2
59	TCC(21)	Panulirus_argus_Forward_Primer_59	TTCTGTGGCAGGTCAAGGG	Panulirus_argus_Reverse_Primer_59	TCAGCTGGGGAACCAAGG	3
60	ATT(66)	Panulirus_argus_Forward_Primer_60	TTTGACCTTAACCTAAAATGGTCC	Panulirus_argus_Reverse_Primer_60	TTTTATGTGGTTCTGGCTATGAGG	4
61	AGC(24)	Panulirus_argus_Forward_Primer_61	CCACCACCAGTAACAGCAGG	Panulirus_argus_Reverse_Primer_61	AATTGATTCGCTCCTCCAGC	5
62	TCC(21)	Panulirus_argus_Forward_Primer_62	TTTTCCCCTTTCTCCTTCC	Panulirus_argus_Reverse_Primer_62	GAGGAAGCCTATTTACAGGGG	6
63	ACT(15)	Panulirus_argus_Forward_Primer_63	CTCCCAACACTGCTGCTCC	Panulirus_argus_Reverse_Primer_63	GCAAAAGTTACAAGAGGAGTGGG	7
64	AGG(15)	Panulirus_argus_Forward_Primer_64	CATCGGTCACTTCCTCCTCC	Panulirus_argus_Reverse_Primer_64	CATGAGATACGCCACCATCG	8
65	ATG(15)	Panulirus_argus_Forward_Primer_65	CTGACTACTGCTCCTCCGGC	Panulirus_argus_Reverse_Primer_65	ATCCTGGGCCATTTAGGAGG	9
66	AGC(18)	Panulirus_argus_Forward_Primer_66	ACGTCTTCGGTCCTCCATCC	Panulirus_argus_Reverse_Primer_66	GGTCTCTCCCGACGTGTCC	10
67	TCC(18)	Panulirus_argus_Forward_Primer_67	CAATGCATTCGTATTATGGGG	Panulirus_argus_Reverse_Primer_67	AAAACAAAGCTGGCCTTTCC	11
68	AGG(15)	Panulirus_argus_Forward_Primer_68	ACAGACGAGGAAGGGAAGGG	Panulirus_argus_Reverse_Primer_68	AAACAAAGACGCAATTCGGG	12
69	TCC(21)	Panulirus_argus_Forward_Primer_69	TCTGTGATTGGTGAGGTCCC	Panulirus_argus_Reverse_Primer_69	GGGGTAAAAGAGACGGAGGG	13
70	TGG(21)	Panulirus_argus_Forward_Primer_70	AAGAACAACTTTAGCAAGTGGCG	Panulirus_argus_Reverse_Primer_70	CGCTGGTAGTCAGTCAGTCTGC	14
71	TCC(18)	Panulirus_argus_Forward_Primer_71	TTCTATTGTTGAGGTGTTAGTCACCC	Panulirus_argus_Reverse_Primer_71	CATTCAGTGTACAATCGAGCCC	15
72	TCC(15)	Panulirus_argus_Forward_Primer_72	TTACCTGTGAGTCTTCTCCTTCCC	Panulirus_argus_Reverse_Primer_72	ACAGAAGGCATCGTGACGG	16
73	AGC(15)	Panulirus_argus_Forward_Primer_73	CTCGCCTGGCAGAAGTATCC	Panulirus_argus_Reverse_Primer_73	TCTTCTGCTCCTTCCGGG	17
74	ATT(39)	Panulirus_argus_Forward_Primer_74	GTGGGAATATTTACGACGTTGC	Panulirus_argus_Reverse_Primer_74	GGTGACTTAGGAACAAGAGCCG	18
75	ATT(21)	Panulirus_argus_Forward_Primer_75	GGAACGAACAAACAGAAAAGCC	Panulirus_argus_Reverse_Primer_75	AATGCCCATTTATCTCCTTTCC	19
76	TGG(15)	Panulirus_argus_Forward_Primer_76	TCGTCCGTTCCTGTTTTGG	Panulirus_argus_Reverse_Primer_76	GCTAGTGAGCATCACACGGC	20
77	AGG(21)	Panulirus_argus_Forward_Primer_77	ATAATGGACCAGTGTTGCCG	Panulirus_argus_Reverse_Primer_77	AACACTCACCCCTGCAAAGC	21
78	TTG(15)	Panulirus_argus_Forward_Primer_78	TGCCACTGTTTATAGGCGGG	Panulirus_argus_Reverse_Primer_78	TTTGCATTCCGAAACCTCG	22
79	AGG(18)	Panulirus_argus_Forward_Primer_79	TCACGTTGAGCCACTAACGC	Panulirus_argus_Reverse_Primer_79	GGAGGAGAGACATACGGACCC	23
80	AGG(36)	Panulirus_argus_Forward_Primer_80	ATCGCAGAGGAGTCTGGACG	Panulirus_argus_Reverse_Primer_80	AGCAGGCATTCAGCAGGG	24
81	TCG(15)	Panulirus_argus_Forward_Primer_81	ACTCATAGAGGGTGTGGTGCG	Panulirus_argus_Reverse_Primer_81	GACATGAAGTACGGGTCGCC	25
82	ATT(30)	Panulirus_argus_Forward_Primer_82	TTCTGATGACAACTACACACGG	Panulirus_argus_Reverse_Primer_82	GATATGCTGTCAGTTCCTCCG	26
83	TCC(33)	Panulirus_argus_Forward_Primer_83	GCCAGACAGAAAGTACCGGG	Panulirus_argus_Reverse_Primer_83	CCCGTTCCTCTCGTTAAACC	27
84	TCC(24)	Panulirus_argus_Forward_Primer_84	TCTCCCTCGATTTTACTGTCCC	Panulirus_argus_Reverse_Primer_84	TGCCTAGGAACCACAAACACC	28
85	TGG(18)	Panulirus_argus_Forward_Primer_85	CCTACTTCCCCTCCACTGCC	Panulirus_argus_Reverse_Primer_85	GATAACTTCGGTCGCAAGGC	29
86	TCC(27)	Panulirus_argus_Forward_Primer_86	GAACTGCTGAACAGACCAGGG	Panulirus_argus_Reverse_Primer_86	GGACCGTAATTTCTCCCCG	30
87	TCC(15)	Panulirus_argus_Forward_Primer_87	TACGTCGGTGGTTTGTGTCC	Panulirus_argus_Reverse_Primer_87	CGAAAGATTCAAAACGAGTCAGC	31
88	ATC(15)	Panulirus_argus_Forward_Primer_88	ATGGAATTGCAGTCAGCTCG	Panulirus_argus_Reverse_Primer_88	CACGCACCTTCCTCCTCC	32
89	AGT(24)	Panulirus_argus_Forward_Primer_89	TCAGCAACCTTCTTCATAAAACTACC	Panulirus_argus_Reverse_Primer_89	GGGTTGCTTTGAATTATTGGG	33
90	TGG(15)	Panulirus_argus_Forward_Primer_90	AACTGAACAATGCCATTCCG	Panulirus_argus_Reverse_Primer_90	CCAAGCTTCCACACTCTCCC	34
91	TCC(15)	Panulirus_argus_Forward_Primer_91	TGGATGATACGAGAGGGAAGG	Panulirus_argus_Reverse_Primer_91	TTTCTGCTGGGCCAGTTACC	35
92	AGC(18)	Panulirus_argus_Forward_Primer_92	CTACTCCCACTCACACCCCG	Panulirus_argus_Reverse_Primer_92	GTTAAGCGTGGGACAGCAGG	36
93	TGG(24)	Panulirus_argus_Forward_Primer_93	CCCCAGAACAAATGAAATACG	Panulirus_argus_Reverse_Primer_93	AACCAACCCAAGGCTGTAGG	37
94	TTC(27)	Panulirus_argus_Forward_Primer_94	CATCAATCATACACGGCAGC	Panulirus_argus_Reverse_Primer_94	CATGAATTAACCCTTTGAACGC	38
95	TCC(18)	Panulirus_argus_Forward_Primer_95	AATTAAGGTGGGTGACGGGG	Panulirus_argus_Reverse_Primer_95	AGTTCCCTCACCTCCGCC	39
96	TGG(18)	Panulirus_argus_Forward_Primer_96	GTAACGCGGTCTCCACAGC	Panulirus_argus_Reverse_Primer_96	AATGAGCTATGGCACCCAGG	40
97	TTC(24)	Panulirus_argus_Forward_Primer_97	CATTGGAAAATGAAATACATTCTGG	Panulirus_argus_Reverse_Primer_97	ATACTCAACCTCCTTGGCCG	41
98	AGG(18)	Panulirus_argus_Forward_Primer_98	GATGAGTTGCAGAGGGGAGG	Panulirus_argus_Reverse_Primer_98	CCTCTTCTTCCACATGCTCG	42
99	TCC(15)	Panulirus_argus_Forward_Primer_99	AGACATGCATCTGCTCTGGG	Panulirus_argus_Reverse_Primer_99	CACACTGTCATGTTCAAGGGG	43
100	TCC(33)	Panulirus_argus_Forward_Primer_100	AGAGGTCGAAGGTCGAAGGC	Panulirus_argus_Reverse_Primer_100	CAGGGCAAGATTGACCAAGG	44
101	TCC(27)	Panulirus_argus_Forward_Primer_101	ATATGATGGCGCCTCTGTCC	Panulirus_argus_Reverse_Primer_101	ACACTCGTCCCCTGAAAACG	45
102	AGC(15)	Panulirus_argus_Forward_Primer_102	TTTATCGTTATAGTTTGAAAGTCGAGG	Panulirus_argus_Reverse_Primer_102	GCTCTCACTGCTTATGTTTCCC	46
103	TGG(24)	Panulirus_argus_Forward_Primer_103	ACCCAGGGATGTTCTTCTCG	Panulirus_argus_Reverse_Primer_103	GAAGCACCTTATGAGTGTGAAAGC	47
104	AGG(15)	Panulirus_argus_Forward_Primer_104	CAAACCACACCCCTACCAGG	Panulirus_argus_Reverse_Primer_104	AATTACCCACATGCACCACG	48
105	TCC(15)	Panulirus_argus_Forward_Primer_105	TCCTCATGCTGAAGGAACCC	Panulirus_argus_Reverse_Primer_105	CGGTACAAGGAAGCAGAGAGG	49
106	AGC(15)	Panulirus_argus_Forward_Primer_106	TTTCACCTGAGAAAGAAAGGGG	Panulirus_argus_Reverse_Primer_106	GTCGCTACCTCTGCATCAGC	50
107	TCC(21)	Panulirus_argus_Forward_Primer_107	CCAGAGGCTGAATGACAACC	Panulirus_argus_Reverse_Primer_107	CTCGTGTGAGTCAAGAGCACC	51
108	AGC(15)	Panulirus_argus_Forward_Primer_108	GGGGCTTGAGAGAAGGGG	Panulirus_argus_Reverse_Primer_108	TGGACCGTATTCTTCAGTTTGC	52
109	TTG(24)	Panulirus_argus_Forward_Primer_109	GCATTAAACGGAGAGCTGGC	Panulirus_argus_Reverse_Primer_109	ACATCTCTCACAACACGGGC	53
110	ATT(30)	Panulirus_argus_Forward_Primer_110	CGGTGTAACTCCTTTCAAGCG	Panulirus_argus_Reverse_Primer_110	CACCAGTAGTTCTGAAATTTTGCG	54
111	ACC(18)	Panulirus_argus_Forward_Primer_111	GAATGCAGGAGCGAATTTGG	Panulirus_argus_Reverse_Primer_111	TGTACTGGTATGGTAAGCCAGCC	55
112	AGG(36)	Panulirus_argus_Forward_Primer_112	CTACCCGTGGGTGGGTGG	Panulirus_argus_Reverse_Primer_112	GAGTTTTCCGAAGGGGTAGGG	56
113	ACC(18)	Panulirus_argus_Forward_Primer_113	ATAGGCAACGATGTACCGCC	Panulirus_argus_Reverse_Primer_113	GCCCCTATATACGGTGGAGC	57
114	TCC(24)	Panulirus_argus_Forward_Primer_114	ACAAGCTCACTCCTCCTGGC	Panulirus_argus_Reverse_Primer_114	AGCTCTTGAGTGGGAGTCCG	58
115	ATT(15)	Panulirus_argus_Forward_Primer_115	TCATGCACTATGCATCACGG	Panulirus_argus_Reverse_Primer_115	TCTACTGCGTGGAGTGCAGC	59
116	TCC(15)	Panulirus_argus_Forward_Primer_116	TACGACCAGCTGTGGAAACC	Panulirus_argus_Reverse_Primer_116	GCCTCTCAAACCTTCTCCTCC	60
117	ACC(15)	Panulirus_argus_Forward_Primer_117	GTAAAGGCGAGTGTGAGGGC	Panulirus_argus_Reverse_Primer_117	AGAGGTAGAGAGGGGCCAGC	61
118	TCC(18)	Panulirus_argus_Forward_Primer_118	CTCCACCGTGACACACAAGC	Panulirus_argus_Reverse_Primer_118	GATGTTGACGGCACTGATGG	62
119	ATT(36)	Panulirus_argus_Forward_Primer_119	TGTGTTAAGCGAGTTTTGGAGC	Panulirus_argus_Reverse_Primer_119	AGCACCTTTGTGGGTATGGG	63
120	ATT(15)	Panulirus_argus_Forward_Primer_120	CCGTTTCATGTTACAGTGTGCC	Panulirus_argus_Reverse_Primer_120	GGGCTATTCAGGTGGTCTGG	64
121	AGT(18)	Panulirus_argus_Forward_Primer_121	GTTTGTCTCGGTTGTGGTGG	Panulirus_argus_Reverse_Primer_121	TTTACCACTGCCGTTTCTGC	65
122	ATT(18)	Panulirus_argus_Forward_Primer_122	GACATTTGAAAATCTTGCGCC	Panulirus_argus_Reverse_Primer_122	ACGCAAGGCATGAAACATCC	66
123	ATG(15)	Panulirus_argus_Forward_Primer_123	ATTTCAACCGTCCTACCTGG	Panulirus_argus_Reverse_Primer_123	TTTCACCGATGTCAAAACCC	67
124	AGC(15)	Panulirus_argus_Forward_Primer_124	CTGCTTCTTACACGAACTTTCTCC	Panulirus_argus_Reverse_Primer_124	TTTTGTCCCAGGCTTTCCC	68
125	TTC(30)	Panulirus_argus_Forward_Primer_125	TGCCATAGGGAAAGGATTGG	Panulirus_argus_Reverse_Primer_125	TGGATGTGAGCGAAAACTGG	69
126	AGC(18)	Panulirus_argus_Forward_Primer_126	CATTCTTGGCTCGCAACTCC	Panulirus_argus_Reverse_Primer_126	ATTATCCCACTCACGGTGGC	70
127	AGT(18)	Panulirus_argus_Forward_Primer_127	TTCTCCCTCATCGTTCCAGC	Panulirus_argus_Reverse_Primer_127	AATGAATCACACGACCTGCC	71
128	TGG(15)	Panulirus_argus_Forward_Primer_128	ACACACACTTGCCTATGCCG	Panulirus_argus_Reverse_Primer_128	CCTTCCCCGATGGAGTCG	72
129	TCC(21)	Panulirus_argus_Forward_Primer_129	TGGTGTACAGCAAGCAGATGG	Panulirus_argus_Reverse_Primer_129	ACACGGTGTACACTGCCTGG	73
130	TCC(15)	Panulirus_argus_Forward_Primer_130	AATTAAACGGCTCCCTCTTCC	Panulirus_argus_Reverse_Primer_130	TCTCTGCATCCAAGCGAGG	74
131	TCC(18)	Panulirus_argus_Forward_Primer_131	TATCACCAACGAATCTGCCC	Panulirus_argus_Reverse_Primer_131	ATGGGATGAAAGGCAAATGG	75
132	TGG(18)	Panulirus_argus_Forward_Primer_132	GGTGTTCTTGTGGATGTTTTGG	Panulirus_argus_Reverse_Primer_132	TCATGGCTTAATTATGTCCAGCC	76
133	AGG(15)	Panulirus_argus_Forward_Primer_133	TCCAAAATCTCCTCATTCCCC	Panulirus_argus_Reverse_Primer_133	GAAGGAGTTGCGGACACAGG	77
134	ACG(18)	Panulirus_argus_Forward_Primer_134	GACATTCGACGACGCATCC	Panulirus_argus_Reverse_Primer_134	TTAATTTCGGCTATTCCGCC	78
135	TCC(18)	Panulirus_argus_Forward_Primer_135	TATGGAATCCTCCCCGTTCC	Panulirus_argus_Reverse_Primer_135	AAGAGAGAGGAGTGTGGGCG	79
136	TCC(15)	Panulirus_argus_Forward_Primer_136	GCTCCAGTCTCCACATCACG	Panulirus_argus_Reverse_Primer_136	TCGCCCCATCAACTAAAAGG	80
137	AGG(15)	Panulirus_argus_Forward_Primer_137	CTCCTCCCCACCGTGTTACC	Panulirus_argus_Reverse_Primer_137	AATTCACCGAGGAGGGAAGC	81
138	ATC(30)	Panulirus_argus_Forward_Primer_138	ACAGCAACCACACGATCCC	Panulirus_argus_Reverse_Primer_138	CTCTGGAAGCTGGAAATGCC	82
139	TCC(18)	Panulirus_argus_Forward_Primer_139	GCATGTGCCCCATAATACTACC	Panulirus_argus_Reverse_Primer_139	ATTCACAGAGACCAACGGGC	83
140	AGG(18)	Panulirus_argus_Forward_Primer_140	GGGTGATGGTTTTGAGAATGG	Panulirus_argus_Reverse_Primer_140	CGCTAATGGTAAGGCTCCCC	84
141	AGC(15)	Panulirus_argus_Forward_Primer_141	GAACAGCGGGGCTAAAAGC	Panulirus_argus_Reverse_Primer_141	GCACAAGTCCTTGGGTGTCC	85
142	TCC(18)	Panulirus_argus_Forward_Primer_142	TGGCAGAGTCTCTCAGGTCG	Panulirus_argus_Reverse_Primer_142	AAAGTGCCTTCAGGTCCACG	86
143	AGG(15)	Panulirus_argus_Forward_Primer_143	AGAGAACATGAAACAGTGAACCG	Panulirus_argus_Reverse_Primer_143	TGGCTGTTAGTGTTGAGGCG	87
144	ATG(18)	Panulirus_argus_Forward_Primer_144	GGCCAATCCTTAAACACCCG	Panulirus_argus_Reverse_Primer_144	ACACACACACCCGTTGATGG	88
145	TTC(15)	Panulirus_argus_Forward_Primer_145	GATGAGAAGAGGGGAACATGG	Panulirus_argus_Reverse_Primer_145	TTCTTCTTGTGTTCCGGACG	89
146	AGG(18)	Panulirus_argus_Forward_Primer_146	GTGGCTCCGTAGGTCATGG	Panulirus_argus_Reverse_Primer_146	AACTTTTATTGTGGCTCCTCAGC	90
147	TCC(21)	Panulirus_argus_Forward_Primer_147	CTGGCCAACCCACAGTATCC	Panulirus_argus_Reverse_Primer_147	CTCTCCCCGGTCGTCTAAGC	91
148	ACC(15)	Panulirus_argus_Forward_Primer_148	CTCGGGAGCTTGTGTGATCC	Panulirus_argus_Reverse_Primer_148	AGGACTCTGTCTGCGGAACC	92
149	TTC(15)	Panulirus_argus_Forward_Primer_149	ATGCCTTCCCCTTAATTGCC	Panulirus_argus_Reverse_Primer_149	GAAGGCTTATATACATCTTGCTTATCAGG	93
150	TCC(18)	Panulirus_argus_Forward_Primer_150	ATCTGCCGTAGACCTCGTGC	Panulirus_argus_Reverse_Primer_150	GAATGAGTGAGAAGGAGGGAGG	94
151	ATT(24)	Panulirus_argus_Forward_Primer_151	GTTATTTTCTACATAGTAATATATGGGCG	Panulirus_argus_Reverse_Primer_151	TGATCATCCTCTTCCTGTGG	95
152	ACC(18)	Panulirus_argus_Forward_Primer_152	AAGCAAGAGGGGTAGTGGGG	Panulirus_argus_Reverse_Primer_152	AAGGTGAGAAAGAGGCGGC	96
153	TTC(21)	Panulirus_argus_Forward_Primer_153	GCCTGATTCCAGGAGTTACCC	Panulirus_argus_Reverse_Primer_153	TGAACGTGCAAGAAAGACGC	97
154	TCC(18)	Panulirus_argus_Forward_Primer_154	TCCATGCAGTAAGGTTTTGGC	Panulirus_argus_Reverse_Primer_154	CTCACCACCAGTGATGTCCC	98
155	TTC(15)	Panulirus_argus_Forward_Primer_155	GGCCTTGTGAGAGTTCTTGC	Panulirus_argus_Reverse_Primer_155	TCAAGAAAAGGATTTACCGAGC	99
156	ATG(18)	Panulirus_argus_Forward_Primer_156	CTATTATCGTACCCCACCTACTGC	Panulirus_argus_Reverse_Primer_156	CGGAAGAGACTGCTTAAAATTCG	100
157	TGG(15)	Panulirus_argus_Forward_Primer_157	CGAGGTAAGAACGACCGACC	Panulirus_argus_Reverse_Primer_157	CCCAAGCAAGGCCTACTCC	101
158	AGC(15)	Panulirus_argus_Forward_Primer_158	TACTGCAGCAGCACCGTAGG	Panulirus_argus_Reverse_Primer_158	ACTAGTCCTGCTGCTTCCGC	102
159	TGG(15)	Panulirus_argus_Forward_Primer_159	ATCAATGTGCTGGTGATGGC	Panulirus_argus_Reverse_Primer_159	CCTGTCACTGCTTTTACAGCTCC	103
160	TGG(21)	Panulirus_argus_Forward_Primer_160	CTGTCTGGTTCTTCCCCTCC	Panulirus_argus_Reverse_Primer_160	TAGCCAAACATGGTGTTCCG	104
161	ATT(15)	Panulirus_argus_Forward_Primer_161	TTTCATTTAGTTGCGAATTGCC	Panulirus_argus_Reverse_Primer_161	CAACCGGAACTATACGATGCC	105
162	AGG(36)	Panulirus_argus_Forward_Primer_162	GATCATCGCCAACAATGACG	Panulirus_argus_Reverse_Primer_162	TATTCCCGCACCACACTAGG	106
163	AGC(18)	Panulirus_argus_Forward_Primer_163	AACTAGCGGTGGACTCAGGG	Panulirus_argus_Reverse_Primer_163	CCGCTCTGACTGGTTCTGG	107
164	TGG(15)	Panulirus_argus_Forward_Primer_164	AGTGGTGGAAGGAACAACGG	Panulirus_argus_Reverse_Primer_164	GGTGCCTCTTGTTCAGACCC	108
165	TTG(24)	Panulirus_argus_Forward_Primer_165	GGTACGACCCCGTTCCCC	Panulirus_argus_Reverse_Primer_165	CAAATGAATTACCCAACTATCCTAAAAGC	109
166	TCC(15)	Panulirus_argus_Forward_Primer_166	AGGAGGCCAGCAGTTTTAGC	Panulirus_argus_Reverse_Primer_166	ACTTGGGGAGCACTGTTTGC	110
167	AGC(18)	Panulirus_argus_Forward_Primer_167	CACGGTGACATGTGTTACAAGC	Panulirus_argus_Reverse_Primer_167	CAAGCCAGATACCAACCCG	111
168	TGG(18)	Panulirus_argus_Forward_Primer_168	CAAGCCCCTTTTATCCTCCC	Panulirus_argus_Reverse_Primer_168	GAGAGGAAGGGGCTCTACGG	112
169	TCC(30)	Panulirus_argus_Forward_Primer_169	GTCCCTTAACCACATCCCC	Panulirus_argus_Reverse_Primer_169	AGGGCGCTGGAAGTAAGC	113
170	ATT(15)	Panulirus_argus_Forward_Primer_170	AACCCGCTTGCCCTATGC	Panulirus_argus_Reverse_Primer_170	CATCTCAACATGCTCGGTGC	114
171	CGG(15)	Panulirus_argus_Forward_Primer_171	CCACTGAGGGAAGAACTCCG	Panulirus_argus_Reverse_Primer_171	GACTACCACAGATGAGACGAACG	115
172	TCC(21)	Panulirus_argus_Forward_Primer_172	ACGATACTCTCGCCACTCGC	Panulirus_argus_Reverse_Primer_172	AGTATCTGACCCTCTGGGCG	116
173	AGG(15)	Panulirus_argus_Forward_Primer_173	ACCGTGTCTGGAGATGATGC	Panulirus_argus_Reverse_Primer_173	AGGAATTCCAGAGTCCCTCG	117
174	TCC(15)	Panulirus_argus_Forward_Primer_174	TGACCATATCCCACAGCACC	Panulirus_argus_Reverse_Primer_174	CTTCGCTCAGGGAGTGTCG	118
175	TCC(15)	Panulirus_argus_Forward_Primer_175	GGGGTGAGGGAGGTTAGGG	Panulirus_argus_Reverse_Primer_175	GGTCTCAGAGAGCTGCGGG	119
176	AGG(21)	Panulirus_argus_Forward_Primer_176	AGACCTAACGAACACGCACG	Panulirus_argus_Reverse_Primer_176	AGCTGTGGCGAGAGGTAAGG	120
177	TCC(18)	Panulirus_argus_Forward_Primer_177	ACATGCTGTCAACGGGAGG	Panulirus_argus_Reverse_Primer_177	GTCTCTTTCCACTGCACCCG	121
178	TCC(21)	Panulirus_argus_Forward_Primer_178	ACAGTCCTCCCATGGTCTCC	Panulirus_argus_Reverse_Primer_178	AGTTTCATAAATATTTTGCCTCGG	122
179	TCC(21)	Panulirus_argus_Forward_Primer_179	TCCATATAATGCCACAAAAGCG	Panulirus_argus_Reverse_Primer_179	TCCCCATCTCTACCTCCTGC	123
180	AGC(15)	Panulirus_argus_Forward_Primer_180	TCTGTGTGGTGAGGCAGAGG	Panulirus_argus_Reverse_Primer_180	AAGACTCAGGACTTACGTCGCC	124
181	CGG(24)	Panulirus_argus_Forward_Primer_181	CTCCCCTACCCGAGACGG	Panulirus_argus_Reverse_Primer_181	CCGAGGAAACTGTGCTTGC	125
182	TGG(15)	Panulirus_argus_Forward_Primer_182	CGTTCTCTGACTTGTTGGGG	Panulirus_argus_Reverse_Primer_182	CACAGGTGTAGGAAAGGTCGG	126
183	TCC(18)	Panulirus_argus_Forward_Primer_183	TCTCACCCTTCCTCTCCTGG	Panulirus_argus_Reverse_Primer_183	ATGTTCCTTTGGAATGGCCC	127
184	ATC(21)	Panulirus_argus_Forward_Primer_184	TCCAAGATGAAGTGATGTCAGG	Panulirus_argus_Reverse_Primer_184	CCCTAGGCAGTTAAGAGGGC	128
185	TCC(18)	Panulirus_argus_Forward_Primer_185	CTCTCTCCAGGGAAGGTGGG	Panulirus_argus_Reverse_Primer_185	GGGAACGGAGAGACAAGGC	129
186	ATT(18)	Panulirus_argus_Forward_Primer_186	CGCCTTTCTTCGTCAGTTCC	Panulirus_argus_Reverse_Primer_186	ACCCTTCGTTTCCTCAACCC	130
187	TCC(21)	Panulirus_argus_Forward_Primer_187	TGAGGCTGGTATCATGTGAGG	Panulirus_argus_Reverse_Primer_187	TGATAAGGAGGGAAGTTCAGTAAAGG	131
188	TCC(18)	Panulirus_argus_Forward_Primer_188	CAGTCCCTGGACTTTGTGAGC	Panulirus_argus_Reverse_Primer_188	GTTCTCATGGAATGGTTGCG	132
189	AGG(21)	Panulirus_argus_Forward_Primer_189	AGGAGGCGTCTTCACTCAGC	Panulirus_argus_Reverse_Primer_189	CTGCCCTACCCCGAGTCC	133
190	TGG(18)	Panulirus_argus_Forward_Primer_190	GTGCTGGTGAATCCTGATCG	Panulirus_argus_Reverse_Primer_190	AACCACGTGTCCCTCTCACC	134
191	TCC(15)	Panulirus_argus_Forward_Primer_191	GATGGTGTAGTGGGAAGGGG	Panulirus_argus_Reverse_Primer_191	AAGTCTGGAACGGGGTATGG	135
192	AGG(18)	Panulirus_argus_Forward_Primer_192	ACGGTCTTCTTTCCTCACCG	Panulirus_argus_Reverse_Primer_192	AAGACGTCCGAGTCCACAGG	136
193	CGG(18)	Panulirus_argus_Forward_Primer_193	AACTCCTCTAGACATGTGACTCGC	Panulirus_argus_Reverse_Primer_193	TGCAGCATCCAGTTAAGAGGC	137
194	AGG(18)	Panulirus_argus_Forward_Primer_194	CATATGCTTCCTGACTCCACG	Panulirus_argus_Reverse_Primer_194	TGCGAAGAAGATGAATTTGG	138
195	TGG(15)	Panulirus_argus_Forward_Primer_195	TTTCGTAAGGCTGTGAGCCC	Panulirus_argus_Reverse_Primer_195	AGTTGTACGAACGACCCACG	139
196	ACC(18)	Panulirus_argus_Forward_Primer_196	GGGGAAAACATCATTATTTTGG	Panulirus_argus_Reverse_Primer_196	GCTTCTGGAGGCAGTTATCG	140
197	ACC(24)	Panulirus_argus_Forward_Primer_197	CACCCTCCGAAAACAGAACC	Panulirus_argus_Reverse_Primer_197	GTCATACGACAACCTCCCCG	141
198	ACC(18)	Panulirus_argus_Forward_Primer_198	GCTTGTGATACGAGAGCGGG	Panulirus_argus_Reverse_Primer_198	CGTCACTTGTAAACAACAACCCC	142
199	AGG(15)	Panulirus_argus_Forward_Primer_199	TAACGACGGTTCCTCCATCC	Panulirus_argus_Reverse_Primer_199	CCCGTGAAGTGTGGCAGC	143
200	AGC(15)	Panulirus_argus_Forward_Primer_200	GCCTCAGAGAGAGATGTGGG	Panulirus_argus_Reverse_Primer_200	CTTGCAATCCCTTCTCCTCC	144
201	TCC(15)	Panulirus_argus_Forward_Primer_201	CGCTGAAGCATGACTCACTCC	Panulirus_argus_Reverse_Primer_201	TGTGAACACTTTTAGTGTGAATAGATGG	145
202	TCC(21)	Panulirus_argus_Forward_Primer_202	GGGAAAACAAGAGACGTGGG	Panulirus_argus_Reverse_Primer_202	TATGACAGGCGACCGTTGG	146
203	AGC(18)	Panulirus_argus_Forward_Primer_203	GTCGACCAGGAAGAAGAGCG	Panulirus_argus_Reverse_Primer_203	TGCACCTTTTGCTGTATTTGC	147
204	AGG(33)	Panulirus_argus_Forward_Primer_204	TTTCTCTTCGCCAAAACATCC	Panulirus_argus_Reverse_Primer_204	CGCTCAATAGAAGGGTCATCC	148
205	TCC(21)	Panulirus_argus_Forward_Primer_205	AAAACGGTGCGCACTTACG	Panulirus_argus_Reverse_Primer_205	AGTCTCTCCGGGAGTCAGGG	149
206	TGG(24)	Panulirus_argus_Forward_Primer_206	TTTGAGCACCAAACTCCTGG	Panulirus_argus_Reverse_Primer_206	CATCATCGCCTCTACAACCG	150
207	AGG(21)	Panulirus_argus_Forward_Primer_207	ACGGTGAGGAAGGTTTCAGG	Panulirus_argus_Reverse_Primer_207	ATTGGCTGTCTCCCTCATCC	151
208	AGG(18)	Panulirus_argus_Forward_Primer_208	AACAGCTTCACTTAACGGCG	Panulirus_argus_Reverse_Primer_208	GGAGAGGTGCTAGGCTCACC	152
209	TCC(15)	Panulirus_argus_Forward_Primer_209	GAACGACTTACTGAGACATACCCG	Panulirus_argus_Reverse_Primer_209	TGTGGGTTTTGGGAAAGGC	153
210	ACC(15)	Panulirus_argus_Forward_Primer_210	GCCAGACTGGTTTTGTGTGG	Panulirus_argus_Reverse_Primer_210	GCCGCCTCTATAAGCAGACC	154
211	ATG(15)	Panulirus_argus_Forward_Primer_211	AGTGAGCACTTTGCCCTTCC	Panulirus_argus_Reverse_Primer_211	CGAGATCAGGATACGTCAATGG	155
212	TCC(30)	Panulirus_argus_Forward_Primer_212	AACTTCTGGCGTGGGTAAGG	Panulirus_argus_Reverse_Primer_212	TCCGTCCGTTGTTTACTCCG	156
213	AGG(15)	Panulirus_argus_Forward_Primer_213	AGGATGGAAAATGGAGGAGG	Panulirus_argus_Reverse_Primer_213	CTCTGCTCCCATGGTGTCC	157
214	ACC(21)	Panulirus_argus_Forward_Primer_214	ATCACGGCGTTTCTACCAGC	Panulirus_argus_Reverse_Primer_214	AATGAAACTGTGTCGAGGCG	158
215	ATT(15)	Panulirus_argus_Forward_Primer_215	GAGAGATCCAGGCAAGTCCG	Panulirus_argus_Reverse_Primer_215	CGCCGCCTTACTCTATCTGG	159
216	TGG(15)	Panulirus_argus_Forward_Primer_216	TGGAGGGGTAGATTGTAGGGG	Panulirus_argus_Reverse_Primer_216	CACCAATCTCCCAAGAACCC	160
217	ATC(15)	Panulirus_argus_Forward_Primer_217	TTGGATTATAGGGAGGGTGGG	Panulirus_argus_Reverse_Primer_217	AATCACACAATCCGTCACCG	161
218	ATT(15)	Panulirus_argus_Forward_Primer_218	CCATCGCTGAAATGTCTCCC	Panulirus_argus_Reverse_Primer_218	TCTTTTATTCATGGGAATCGTGG	162
219	TCC(21)	Panulirus_argus_Forward_Primer_219	TCCTGCTGTAGTTTCCCTGC	Panulirus_argus_Reverse_Primer_219	GGAGAGTAGTGTGGGTGGGG	163
220	TCC(15)	Panulirus_argus_Forward_Primer_220	CTGTGAGGAGACCGAACACG	Panulirus_argus_Reverse_Primer_220	TAGTCCTTCGCTTCTTGCCG	164
221	TTG(18)	Panulirus_argus_Forward_Primer_221	CCTGTTTGATGCGCTTTTCG	Panulirus_argus_Reverse_Primer_221	TGAGGTCACCAGAGACGTGC	165
222	TCC(21)	Panulirus_argus_Forward_Primer_222	AATATCCAACGGGAAATCCG	Panulirus_argus_Reverse_Primer_222	CTAGATTCATTTACGTGCGTCG	166
223	AAT(15)	Panulirus_argus_Forward_Primer_223	TGGAAACCTTACATAATGAACATCG	Panulirus_argus_Reverse_Primer_223	AAGCAAGTGATAAGCAAGACGC	167
224	AGG(15)	Panulirus_argus_Forward_Primer_224	CTCCTGCCCTCATCAACACC	Panulirus_argus_Reverse_Primer_224	ACGACTCCTGTGGGAGGG	168
225	AGC(21)	Panulirus_argus_Forward_Primer_225	GGTGCTCTGGGATTGGTAGG	Panulirus_argus_Reverse_Primer_225	AGACTGCTGACATAACGGCG	169
226	ATT(27)	Panulirus_argus_Forward_Primer_226	TACGTTAGCCATGTAGCGCC	Panulirus_argus_Reverse_Primer_226	CGTTCACTCGTTCGACTTGG	170
227	AGG(15)	Panulirus_argus_Forward_Primer_227	TTCATTATTGATGATTTCGCGG	Panulirus_argus_Reverse_Primer_227	CGATTATAGGGAGCACAACGG	171
228	CGG(21)	Panulirus_argus_Forward_Primer_228	GCCATACACTGCCTGATTTCC	Panulirus_argus_Reverse_Primer_228	TATGTTACAGTGGTGGCGGC	172
229	TTC(15)	Panulirus_argus_Forward_Primer_229	CACGAGGAAATGGTTGATGG	Panulirus_argus_Reverse_Primer_229	AGACACAGACGGCCAAGAGC	173
230	TGG(15)	Panulirus_argus_Forward_Primer_230	AATGAGACTGCCGCCACC	Panulirus_argus_Reverse_Primer_230	AACACTCCCGTTTCACGAGC	174
231	AGG(15)	Panulirus_argus_Forward_Primer_231	TTTGCCACTGTTTTCTGTTGG	Panulirus_argus_Reverse_Primer_231	GAGTGGGGAAGATGGAGTCG	175
232	TCC(30)	Panulirus_argus_Forward_Primer_232	ACAATTCTCCGTACTCGGGC	Panulirus_argus_Reverse_Primer_232	TGTTTCATTTACACGTGAGCTGC	176
233	TCC(24)	Panulirus_argus_Forward_Primer_233	CATCACCCGCAGTGTAATCC	Panulirus_argus_Reverse_Primer_233	TATTCTGGGCAGTTCCATCG	177
234	AGG(39)	Panulirus_argus_Forward_Primer_234	CAGTGATCACCTGAGGCAGC	Panulirus_argus_Reverse_Primer_234	GTCAGATTCTCTGAAGTACTGTGTAAGC	178
235	AGC(18)	Panulirus_argus_Forward_Primer_235	GCATGGATTATAGCGCAATGG	Panulirus_argus_Reverse_Primer_235	ACAGAAAACGGGGAGGAGG	179
236	ATC(18)	Panulirus_argus_Forward_Primer_236	TCCGATGCTTAACGTTTTCG	Panulirus_argus_Reverse_Primer_236	GGAAAGCGAGGAGAGAATGG	180
237	ACC(18)	Panulirus_argus_Forward_Primer_237	CTCCACAAACCCTTCAAGCC	Panulirus_argus_Reverse_Primer_237	GGCATTGAAGATCAGCCTGG	181
238	AGG(18)	Panulirus_argus_Forward_Primer_238	GGTAGGCAAAAGGTCCCTCC	Panulirus_argus_Reverse_Primer_238	CAACCTTATCATTTCCCGGC	182
239	TGG(21)	Panulirus_argus_Forward_Primer_239	CCCAGTCATATAGCCTCGCC	Panulirus_argus_Reverse_Primer_239	TGATCGTTCGGACAAAAGGC	183
240	TCC(24)	Panulirus_argus_Forward_Primer_240	AAATGCAAAGGTGTTAATAAAAGTGG	Panulirus_argus_Reverse_Primer_240	CCACGCCTGTCATAGTACGC	184
241	ATG(18)	Panulirus_argus_Forward_Primer_241	CCATGATTGCGAGGACACC	Panulirus_argus_Reverse_Primer_241	GGAATATACCGGGAGAGGGG	185
242	TCC(18)	Panulirus_argus_Forward_Primer_242	TACAAACACCGTGGCAATCC	Panulirus_argus_Reverse_Primer_242	GAGTCAGGGAGGCGTAATGG	186
243	TGG(15)	Panulirus_argus_Forward_Primer_243	CAGCACTTAACATCGCCAGC	Panulirus_argus_Reverse_Primer_243	CATGGTGATAGGGGTGTTGC	187
244	AGG(15)	Panulirus_argus_Forward_Primer_244	TGAGGGAGGATGGTAGGTGG	Panulirus_argus_Reverse_Primer_244	CTCCTTCATCGGCAACACC	188
245	TCC(21)	Panulirus_argus_Forward_Primer_245	CATGACGTTCTCTCTTCTTGTCC	Panulirus_argus_Reverse_Primer_245	TTCTTTGGTTCCCTTCCCG	189
246	TGG(15)	Panulirus_argus_Forward_Primer_246	ACGCTGGAGGTAACCAGACG	Panulirus_argus_Reverse_Primer_246	GGGGAGGTACTAAGAGGCCC	190
247	TGG(15)	Panulirus_argus_Forward_Primer_247	CTGCTCCCACGACAACTACC	Panulirus_argus_Reverse_Primer_247	GACCAAACCTAACCCAAGCG	191
248	AGG(15)	Panulirus_argus_Forward_Primer_248	CTCATTCCCTCCTTCCGC	Panulirus_argus_Reverse_Primer_248	AGAGGGGAAACGAAAGAGGC	192
249	AGT(15)	Panulirus_argus_Forward_Primer_249	CGTCGACCAGGTAACCTTCG	Panulirus_argus_Reverse_Primer_249	GGTATGAGAAGAAAATTTCCATTGTAGG	193
250	AGG(15)	Panulirus_argus_Forward_Primer_250	AGGCGATAATGGGTCAATCG	Panulirus_argus_Reverse_Primer_250	AACACCCCTCCTCATACCCC	194
251	TCC(15)	Panulirus_argus_Forward_Primer_251	CCCTTTTCCCTCCTCTCTTCC	Panulirus_argus_Reverse_Primer_251	GAGAAGAAGGGCTGGCTTCC	195
252	AGG(15)	Panulirus_argus_Forward_Primer_252	ATCATGCAGGACAAGACCCG	Panulirus_argus_Reverse_Primer_252	CTCACCTGCCTACTCCACCC	196
253	AGT(21)	Panulirus_argus_Forward_Primer_253	AGCCTGGAAGCAGATGTTCG	Panulirus_argus_Reverse_Primer_253	GTATCCCCACGTCCGGTCC	197
254	ATT(15)	Panulirus_argus_Forward_Primer_254	AACCCCACACACATCGAGC	Panulirus_argus_Reverse_Primer_254	CCAATACAGTGCTTCAGTCAAGG	198
255	ATT(15)	Panulirus_argus_Forward_Primer_255	ATTTCCATTAAGGGCCCAGC	Panulirus_argus_Reverse_Primer_255	AGAAACTTCAGAGGTGGCAGC	199
256	CGG(18)	Panulirus_argus_Forward_Primer_256	GATGCGCACTAACGAGGTCC	Panulirus_argus_Reverse_Primer_256	AACTCCAATCACAAACGGGG	200
257	TCC(15)	Panulirus_argus_Forward_Primer_257	GAGGTCCTTGTGTGAATGCG	Panulirus_argus_Reverse_Primer_257	GAACACCGACCCAGCACC	201
258	ACC(21)	Panulirus_argus_Forward_Primer_258	CGATGGTGATCAAATACGACG	Panulirus_argus_Reverse_Primer_258	ACGGACGGCGACTTATATCC	202
259	AGG(15)	Panulirus_argus_Forward_Primer_259	ATCTTGCAGGGTCCACTCCC	Panulirus_argus_Reverse_Primer_259	ACCCTGTGTGAAGAGGAGCG	203
260	TTC(15)	Panulirus_argus_Forward_Primer_260	TGGGAAAAGACTGTAAAGCATCC	Panulirus_argus_Reverse_Primer_260	AAATTCTCGGACAGTATCCTAAGAGC	204
261	TGG(21)	Panulirus_argus_Forward_Primer_261	GAGGTACTGTGCTGATGCGG	Panulirus_argus_Reverse_Primer_261	GAAGGGAGATGACTGAGGCG	205
262	TCC(15)	Panulirus_argus_Forward_Primer_262	TTTCATCTTGAGTTGTTGCCG	Panulirus_argus_Reverse_Primer_262	CTCTGTCCTTCCCTATCCCC	206
263	TCC(21)	Panulirus_argus_Forward_Primer_263	AAATGTTCTTCCTCCGACGC	Panulirus_argus_Reverse_Primer_263	CAGTTTGTTTCCCACTCCCC	207
264	AGG(48)	Panulirus_argus_Forward_Primer_264	AGCTGCGACAACTCATCTCG	Panulirus_argus_Reverse_Primer_264	GAAAGAAGGGAAAGGAGGGG	208
265	AGG(15)	Panulirus_argus_Forward_Primer_265	TCACAGAAATTTGCTTCGCC	Panulirus_argus_Reverse_Primer_265	GTCGTCATGGTGAGGGACG	209
266	TTC(15)	Panulirus_argus_Forward_Primer_266	TGAGTGGACGGTTTCATTGG	Panulirus_argus_Reverse_Primer_266	ATGTGGAGCGGCTGTTGC	210
267	TCC(15)	Panulirus_argus_Forward_Primer_267	GGTCAGTCAGTCTCCCACAGG	Panulirus_argus_Reverse_Primer_267	GGAGTTAGCAACAGCCACCC	211
268	CCG(18)	Panulirus_argus_Forward_Primer_268	GTCTACCGAATGCTCCTGGC	Panulirus_argus_Reverse_Primer_268	TGCTGCTGCATAAGGACTCG	212
269	TCC(36)	Panulirus_argus_Forward_Primer_269	GTTTCATCAACGATCCGTCC	Panulirus_argus_Reverse_Primer_269	GGGAAGATAGATAGGCTGGCG	213
270	AG(48)	Panulirus_argus_Forward_Primer_270	AGGAATACGTGTCATCCGGG	Panulirus_argus_Reverse_Primer_270	GTTTCCAGGAGACGCGAGG	1
271	AG(26)	Panulirus_argus_Forward_Primer_271	CACCCGTAGATGTGTCCAGG	Panulirus_argus_Reverse_Primer_271	GAGCGCTAATCACAGCAACC	2
272	TG(26)	Panulirus_argus_Forward_Primer_272	CCCCACAGCTAACCCTCC	Panulirus_argus_Reverse_Primer_272	TTGAGTGCCATTTCTGTATTCC	3
273	TG(22)	Panulirus_argus_Forward_Primer_273	GGCAAGACATTACAGGAACTCG	Panulirus_argus_Reverse_Primer_273	CTACATCTGCCGTTCCTCCC	4
274	TG(12)	Panulirus_argus_Forward_Primer_274	CAAAAGGTCCCAAAGCTTGC	Panulirus_argus_Reverse_Primer_274	CCCGTAGCTTCATTTATCCCC	5
275	TG(32)	Panulirus_argus_Forward_Primer_275	CATATGGGAACTGTGTGATGTGG	Panulirus_argus_Reverse_Primer_275	GCAAAATCCTCGACAGGACC	6
276	AT(12)	Panulirus_argus_Forward_Primer_276	AAGATGATCTCTGACTGGGGC	Panulirus_argus_Reverse_Primer_276	ACTGTGGATATTTCATCACAAAGG	7
277	TG(24)	Panulirus_argus_Forward_Primer_277	CCCAAAACTACAATATTCTTCGGC	Panulirus_argus_Reverse_Primer_277	CTGTAACACAGCCCTGAGCG	8
278	TG(36)	Panulirus_argus_Forward_Primer_278	TCTGCAATCAGGCTGGTACG	Panulirus_argus_Reverse_Primer_278	GAGCGTGAATTATGGCCAGG	9
279	AG(12)	Panulirus_argus_Forward_Primer_279	TAAAGCAGCTGCCTCTGACG	Panulirus_argus_Reverse_Primer_279	GCCTGCTGGATTTTGTACCC	10
280	AG(12)	Panulirus_argus_Forward_Primer_280	CCCTTTTCCTATCTTTCACTCGC	Panulirus_argus_Reverse_Primer_280	TGATGGAACGAAATACGAGGG	11
281	AG(28)	Panulirus_argus_Forward_Primer_281	AACTGTCTCTCACGTGGGGC	Panulirus_argus_Reverse_Primer_281	CTCCCCAGAGAGAAGGAGGG	12
282	TG(36)	Panulirus_argus_Forward_Primer_282	ATCATCAAGACGGACGACCC	Panulirus_argus_Reverse_Primer_282	GGGAGGTGGAGTAGCAGTCG	13
283	AG(16)	Panulirus_argus_Forward_Primer_283	GCCCTTTTGTAATGACGTGG	Panulirus_argus_Reverse_Primer_283	TGACCAACCAGACTCATGCC	14
284	TG(24)	Panulirus_argus_Forward_Primer_284	GGGAAATCCTCCGTCAATCC	Panulirus_argus_Reverse_Primer_284	AAGGAAGATTAGCCAGGCCC	15
285	TG(30)	Panulirus_argus_Forward_Primer_285	ACACCTGACCTTTCGTGTGG	Panulirus_argus_Reverse_Primer_285	AGAGCAAATGGCCTCAGTCG	16
286	AG(24)	Panulirus_argus_Forward_Primer_286	GGAAAATGTGCGTGTTGGG	Panulirus_argus_Reverse_Primer_286	CGTGTGTCTAAAACAGCGCC	17
287	AG(54)	Panulirus_argus_Forward_Primer_287	AAAAGTCCGGGCTCCTCC	Panulirus_argus_Reverse_Primer_287	ATTACTGCACCTGCAACCCC	18
288	AT(38)	Panulirus_argus_Forward_Primer_288	TGTATACCACTTGCAGTCGTCC	Panulirus_argus_Reverse_Primer_288	TTCTTAATCCTTCTCTCTTTATCGG	19
289	TG(36)	Panulirus_argus_Forward_Primer_289	GAAATTTCGGTTTCGTTGC	Panulirus_argus_Reverse_Primer_289	ATGTTACACAGGGGACTGGG	20
290	AG(24)	Panulirus_argus_Forward_Primer_290	AGGAAGCCCTTCAGTTCAGC	Panulirus_argus_Reverse_Primer_290	TGCCTACTGATGACCAGACAGC	21
291	AG(32)	Panulirus_argus_Forward_Primer_291	GGTCGTTATTGCATTCCTGC	Panulirus_argus_Reverse_Primer_291	GGGCAATATACTTGCTTCCCC	22
292	TG(18)	Panulirus_argus_Forward_Primer_292	GGCGGAGAGACGATACTACG	Panulirus_argus_Reverse_Primer_292	GGGGTTCTATGGAGCCAGG	23
293	TG(14)	Panulirus_argus_Forward_Primer_293	CCTGCCCCATTTAATTTCCC	Panulirus_argus_Reverse_Primer_293	GATAATCCAGCGACCTTCCG	24
294	AT(12)	Panulirus_argus_Forward_Primer_294	TTGTCATATAACGCGCGAGG	Panulirus_argus_Reverse_Primer_294	GCAAGGAGCAGCAAGTATGC	25
295	AT(24)	Panulirus_argus_Forward_Primer_295	GGTAGGAACTTTCAAGCAAGAGC	Panulirus_argus_Reverse_Primer_295	CACATCCATGCACATACACG	26
296	AG(34)	Panulirus_argus_Forward_Primer_296	AGACGCGGTACGGTAAGGG	Panulirus_argus_Reverse_Primer_296	ACAGCGTTACTGAGAGCCCC	27
297	TC(18)	Panulirus_argus_Forward_Primer_297	AGAGGCGTGACTGACAGACG	Panulirus_argus_Reverse_Primer_297	CTTTCCATTCCTGGAGGAGG	28
298	TG(34)	Panulirus_argus_Forward_Primer_298	CACCTCTCGTAACCTTGGGC	Panulirus_argus_Reverse_Primer_298	TTAATCGTCCAACAGCGTCC	29
299	AG(34)	Panulirus_argus_Forward_Primer_299	TCCAGATGGAGTGTTGAGGG	Panulirus_argus_Reverse_Primer_299	GGGTGACAGATTCTGAGGGG	30
300	AG(12)	Panulirus_argus_Forward_Primer_300	TTGATTATGTTGGGTGTTTGGG	Panulirus_argus_Reverse_Primer_300	TTCTCATTCTGTCCCCGACC	31
301	TG(18)	Panulirus_argus_Forward_Primer_301	TTCATCTCTATTCCAAGGTACGC	Panulirus_argus_Reverse_Primer_301	TCAATTGAATTTGGAAAGAACTGC	32
302	AG(16)	Panulirus_argus_Forward_Primer_302	GCTAGTGTCAGGGTACGTGGC	Panulirus_argus_Reverse_Primer_302	CATCAGCTCCCAACCTCTCC	33
303	AG(24)	Panulirus_argus_Forward_Primer_303	GGTGGCAAAATCTTCACCG	Panulirus_argus_Reverse_Primer_303	ACCGACGGAAGGAGAGTGG	34
304	TG(16)	Panulirus_argus_Forward_Primer_304	TGCATTTATGTCTGGGATGC	Panulirus_argus_Reverse_Primer_304	GCATCATCAACTATACCACCCC	35
305	TG(20)	Panulirus_argus_Forward_Primer_305	ACCCAGCAAAGAATTGTGCC	Panulirus_argus_Reverse_Primer_305	ACGGTCATGGACACTCATGC	36
306	TG(34)	Panulirus_argus_Forward_Primer_306	GGTTTGGCAATTTCTCTGCC	Panulirus_argus_Reverse_Primer_306	CTACGTCAAGGTGAGCTCCG	37
307	AG(12)	Panulirus_argus_Forward_Primer_307	AACGGGTGAGAGAATAGAAGCG	Panulirus_argus_Reverse_Primer_307	TGAGACATTCGACCGAGACG	38
308	AG(48)	Panulirus_argus_Forward_Primer_308	ACCCTGAAACGTGAGCTTGC	Panulirus_argus_Reverse_Primer_308	TTCAACCAAGGGTCCTCAGC	39
309	TG(22)	Panulirus_argus_Forward_Primer_309	GTCCCCATGTGTGGAAAACG	Panulirus_argus_Reverse_Primer_309	GGTTTCAACATATAGTCCCGGC	40
310	TG(12)	Panulirus_argus_Forward_Primer_310	GAAGCATATTTATATCAGTGAGACATCG	Panulirus_argus_Reverse_Primer_310	GAACACTACATGACTCGAAATCCG	41
311	TG(20)	Panulirus_argus_Forward_Primer_311	AGCGCTTCCAGTGTAAAGCC	Panulirus_argus_Reverse_Primer_311	AGATTACCCGAAATGCCAGG	42
312	TG(18)	Panulirus_argus_Forward_Primer_312	GTCAAGTCCAAGTGTTGCGG	Panulirus_argus_Reverse_Primer_312	TGGAGGTGATATTATCGTGCG	43
313	TG(26)	Panulirus_argus_Forward_Primer_313	GGGTTTGAGTTAGGGACCCG	Panulirus_argus_Reverse_Primer_313	GGTTTAAACATAGCACACAAGGTCC	44
314	AG(12)	Panulirus_argus_Forward_Primer_314	TCTCCGTTTCCTTTTCGACG	Panulirus_argus_Reverse_Primer_314	TAAAGAGGTGTTCCGAGGGC	45
315	TG(38)	Panulirus_argus_Forward_Primer_315	TAGAGGTGATGGGATGCACG	Panulirus_argus_Reverse_Primer_315	ACCCCAAATGAAAGACTGGG	46
316	AG(14)	Panulirus_argus_Forward_Primer_316	ATCCGCACTATGCCTTAGCC	Panulirus_argus_Reverse_Primer_316	GAAATTTGTCTCGTGCTGACG	47
317	TG(14)	Panulirus_argus_Forward_Primer_317	GCGTCTTCTTCAGAGGCTCC	Panulirus_argus_Reverse_Primer_317	AATCCGGATCGAGAGAAAACC	48
318	TG(16)	Panulirus_argus_Forward_Primer_318	CCATTACGGTAACCTCTCCCC	Panulirus_argus_Reverse_Primer_318	AGTGCTGACAGCCTCACACG	49
319	TG(18)	Panulirus_argus_Forward_Primer_319	TAAAGGCACTGGTCCCATCC	Panulirus_argus_Reverse_Primer_319	TTTACGCGTACCTGTGTGCC	50
320	TG(18)	Panulirus_argus_Forward_Primer_320	CACTCGAGTCTCACATGCCG	Panulirus_argus_Reverse_Primer_320	CCCTCTTCTTCCGTCAAACG	51
321	AG(18)	Panulirus_argus_Forward_Primer_321	TGAGTCTGCAGTCCTCGTCC	Panulirus_argus_Reverse_Primer_321	GTCCCATACGCAAGATCACG	52
322	AG(12)	Panulirus_argus_Forward_Primer_322	CTCACGTATGCAAATTGGGG	Panulirus_argus_Reverse_Primer_322	GCCAAGATTCAACACAGGGG	53
323	AG(14)	Panulirus_argus_Forward_Primer_323	ACATGCAGTTCCTCAGGTCG	Panulirus_argus_Reverse_Primer_323	TACCTTCAACAGGGAACGCC	54
324	AT(12)	Panulirus_argus_Forward_Primer_324	GCACTAAAACATCCTTGTTCTTCC	Panulirus_argus_Reverse_Primer_324	CCGTATAAGCACAGGAAACGG	55
325	AG(22)	Panulirus_argus_Forward_Primer_325	CCCTGTGGGAAGTCATCACG	Panulirus_argus_Reverse_Primer_325	CAGGATCTGCTGACCAGACG	56
326	TG(32)	Panulirus_argus_Forward_Primer_326	CATTCCTGTTGTCCTCTTCCG	Panulirus_argus_Reverse_Primer_326	CAAAGTTAAGACACAGGACAGCG	57
327	TG(16)	Panulirus_argus_Forward_Primer_327	TTAGTCATTCCCCTCACGGC	Panulirus_argus_Reverse_Primer_327	TTTGATCTAAACGAACAGCTCCC	58
328	TG(12)	Panulirus_argus_Forward_Primer_328	GAGATCACTCACTCCACTGACG	Panulirus_argus_Reverse_Primer_328	AAAGTACGTTGCATTGAGTGCC	59
329	TG(14)	Panulirus_argus_Forward_Primer_329	CCTCCTCCTCATCATCACCG	Panulirus_argus_Reverse_Primer_329	CCCTTAAACAACACTCCCTTCG	60
330	TG(14)	Panulirus_argus_Forward_Primer_330	CTAACACCGGTGCTCTCTGG	Panulirus_argus_Reverse_Primer_330	GGTTGGTTGGTGTTGATCCC	61
331	AG(26)	Panulirus_argus_Forward_Primer_331	TTCCCTGCTGTTCGTCTGG	Panulirus_argus_Reverse_Primer_331	GAGGCTTCCATGCACATTCC	62
332	AG(22)	Panulirus_argus_Forward_Primer_332	ATCCACAATGGGAAACGACG	Panulirus_argus_Reverse_Primer_332	ATGGCCATGACTGGAAAAGG	63
333	AT(18)	Panulirus_argus_Forward_Primer_333	GCACTTTTCCAGGTCTTCAAGG	Panulirus_argus_Reverse_Primer_333	AGAAACTGGTCCAACTGCTCC	64
334	AG(58)	Panulirus_argus_Forward_Primer_334	CCCTCTACACGTACCTCCCC	Panulirus_argus_Reverse_Primer_334	GACGAGAGGGAAAGGTCTCG	65
335	TG(20)	Panulirus_argus_Forward_Primer_335	ATGGGACCACAAAACACTGC	Panulirus_argus_Reverse_Primer_335	CCAAAGAAAGAGTTTGGCTCG	66
336	TC(12)	Panulirus_argus_Forward_Primer_336	ACCGACTTTGCCAGGTTAGG	Panulirus_argus_Reverse_Primer_336	ATAAAGTCGGCCCACTCACC	67
337	AG(16)	Panulirus_argus_Forward_Primer_337	TGAAGTCATGGTCCACCACC	Panulirus_argus_Reverse_Primer_337	GCAACACTCCACAAAGGTGC	68
338	AG(50)	Panulirus_argus_Forward_Primer_338	GTGAAGGGGTGGGAGTTGG	Panulirus_argus_Reverse_Primer_338	TCCACCTTATCATAGGCTTTCTCC	69
339	TG(26)	Panulirus_argus_Forward_Primer_339	AGATAACATATCTCCTCCGTCAGC	Panulirus_argus_Reverse_Primer_339	TTTATCATGGCCGTTACCCC	70
340	TG(24)	Panulirus_argus_Forward_Primer_340	TGCCGGGAACCATTATAAACC	Panulirus_argus_Reverse_Primer_340	GACCAGTGAGGACCAATCCG	71
341	TG(52)	Panulirus_argus_Forward_Primer_341	GCATAATGTTGCAAGGTGTTGG	Panulirus_argus_Reverse_Primer_341	GCTTGACCTCTCCCTTGCC	72
342	TG(24)	Panulirus_argus_Forward_Primer_342	GAACACTGCCTCACACACGG	Panulirus_argus_Reverse_Primer_342	CGACTTCCTGCCTCTCAACC	73
343	TG(16)	Panulirus_argus_Forward_Primer_343	GCGGTAATAAGCGATTTGCG	Panulirus_argus_Reverse_Primer_343	GTGAGTCGCGACATTCAACC	74
344	TG(18)	Panulirus_argus_Forward_Primer_344	CAATCAAGGAGGACTTGGCG	Panulirus_argus_Reverse_Primer_344	GTCGGACATTCCAACCATCC	75
345	TG(12)	Panulirus_argus_Forward_Primer_345	CCCAGTTAATGCGAAGCACC	Panulirus_argus_Reverse_Primer_345	GCTTCCTTTGACATTCTGTATTGG	76
346	TG(14)	Panulirus_argus_Forward_Primer_346	AAGTAATCCCCATTCCTCGC	Panulirus_argus_Reverse_Primer_346	CTCCCTCAGTCTCCTCTTTCC	77
347	AG(30)	Panulirus_argus_Forward_Primer_347	TCGTCTTTTCATCCCCTTCC	Panulirus_argus_Reverse_Primer_347	GAGGCCATAGGAAACATGGG	78
348	AG(24)	Panulirus_argus_Forward_Primer_348	GTGCTTACGACGAGATTGCG	Panulirus_argus_Reverse_Primer_348	AATCATGAGACACATTCCGGG	79
349	AT(54)	Panulirus_argus_Forward_Primer_349	TTGGACCGACATGACTTTATTAGC	Panulirus_argus_Reverse_Primer_349	TTGAAGCGTTTTAGCCCAGC	80
350	TG(16)	Panulirus_argus_Forward_Primer_350	CACATACCCCATCCATTCCC	Panulirus_argus_Reverse_Primer_350	TGTTCTGCTATTATTGCTCAGTGC	81
351	AT(26)	Panulirus_argus_Forward_Primer_351	CCAATCAGCAGTCTTCTTTCAGC	Panulirus_argus_Reverse_Primer_351	AAAATGACTATGGGGCCTGG	82
352	TG(20)	Panulirus_argus_Forward_Primer_352	CAGAGTGCAAAACTCTCTTCCC	Panulirus_argus_Reverse_Primer_352	CAAGACCCTTCCTCACGACC	83
353	TG(18)	Panulirus_argus_Forward_Primer_353	TGTTGATGAGTGGGTACGGC	Panulirus_argus_Reverse_Primer_353	TGACCGTTTTACCTCCACCC	84
354	TG(16)	Panulirus_argus_Forward_Primer_354	ACGCTCATTACATGGGGAGG	Panulirus_argus_Reverse_Primer_354	CAATAACTCTCAAACACTGGCACC	85
355	TG(22)	Panulirus_argus_Forward_Primer_355	AAACGGTTTGTAGGGATGCG	Panulirus_argus_Reverse_Primer_355	CGATGGGGTAAATGACCTCG	86
356	AG(12)	Panulirus_argus_Forward_Primer_356	GAAGGACTATCTGCGCTGCC	Panulirus_argus_Reverse_Primer_356	CACAGCCGCGTATGATAAGG	87
357	TC(24)	Panulirus_argus_Forward_Primer_357	TGTATTCCCGAAGAGCCACC	Panulirus_argus_Reverse_Primer_357	ATGACCTGGTGACTGAACGC	88
358	TG(20)	Panulirus_argus_Forward_Primer_358	TTCATGACCTGTGAGACGGC	Panulirus_argus_Reverse_Primer_358	CACCACACGCTTCTCTCTCG	89
359	AG(12)	Panulirus_argus_Forward_Primer_359	TCAGCACATAAGGAAAGGAAAGC	Panulirus_argus_Reverse_Primer_359	CTTACCGAGGGAGGGAAAGG	90
360	TG(38)	Panulirus_argus_Forward_Primer_360	ATGCCGTTGAGGATTTAGCC	Panulirus_argus_Reverse_Primer_360	CACAACCCCACGGAAACC	91
361	AT(14)	Panulirus_argus_Forward_Primer_361	TGCTTGGCTATATCGGACCC	Panulirus_argus_Reverse_Primer_361	TGTTTTCTTGGTAAATACTGATGCG	92
362	TC(38)	Panulirus_argus_Forward_Primer_362	GTCACAGTTCACCTGGACCC	Panulirus_argus_Reverse_Primer_362	GCGTCTGTCTTTGACTAAATCGG	93
363	TG(12)	Panulirus_argus_Forward_Primer_363	CCTGGAAACATGACTGGTCG	Panulirus_argus_Reverse_Primer_363	TCTGATGCAGAGAGGAACTAGGG	94
364	TG(30)	Panulirus_argus_Forward_Primer_364	CACGACAAGACTGTCGGTCC	Panulirus_argus_Reverse_Primer_364	AAAACATTCCTGCCTCTCGG	95
365	TC(32)	Panulirus_argus_Forward_Primer_365	CACTGATGCCAAACTGTTGC	Panulirus_argus_Reverse_Primer_365	CACGAGTCCTAACCTTCGGG	96
366	TG(12)	Panulirus_argus_Forward_Primer_366	TCATTGGATACTTACCCTACCACG	Panulirus_argus_Reverse_Primer_366	GGAATTCTCCAGTCCCTTCC	97
367	AT(22)	Panulirus_argus_Forward_Primer_367	CAGTCAGTTGAACCTCGAAACG	Panulirus_argus_Reverse_Primer_367	ACCAGCGCCAGTTTTCTACC	98
368	TC(16)	Panulirus_argus_Forward_Primer_368	ACAGTGTCCTCGTGAATCGC	Panulirus_argus_Reverse_Primer_368	GTGAGACGGGGTGAGTAGGG	99
369	AG(14)	Panulirus_argus_Forward_Primer_369	TGCGTGTTATTCGACCTTCC	Panulirus_argus_Reverse_Primer_369	CAAGGAGGATCCAGGTGTGG	100
370	TG(18)	Panulirus_argus_Forward_Primer_370	TGATTCAACATGGGAAACGC	Panulirus_argus_Reverse_Primer_370	CCATCTCCCTCAACAGGAGG	101
371	AT(18)	Panulirus_argus_Forward_Primer_371	TACACACGTGGGACACAGCC	Panulirus_argus_Reverse_Primer_371	CGAAGGATGTTATCGCTGGG	102
372	TC(18)	Panulirus_argus_Forward_Primer_372	GTCGAAACTTTGGGGTCTGG	Panulirus_argus_Reverse_Primer_372	ACTTTCGCTGCTTTTGAGGC	103
373	AT(18)	Panulirus_argus_Forward_Primer_373	TGACAGGAGGACTCCCTTGC	Panulirus_argus_Reverse_Primer_373	TTCATTCCCAATAATGCGCC	104
374	TG(36)	Panulirus_argus_Forward_Primer_374	CGTTGATACATGGCCAAAGG	Panulirus_argus_Reverse_Primer_374	GACAGCGACAAAAGAAATCCG	105
375	AG(28)	Panulirus_argus_Forward_Primer_375	GAGTGTCTTTAAGGGTGGTAAGGG	Panulirus_argus_Reverse_Primer_375	ATGGTCTCCGGGTACTGTGG	106
376	AG(76)	Panulirus_argus_Forward_Primer_376	GGCCTCTGGTGAATGTAGTTGG	Panulirus_argus_Reverse_Primer_376	GTATGGCCCTTGTGGGTACG	107
377	TG(18)	Panulirus_argus_Forward_Primer_377	ATTTTACGCTGGTATGGCCG	Panulirus_argus_Reverse_Primer_377	CGAGGTGTGTCTAGGTCCCC	108
378	TG(46)	Panulirus_argus_Forward_Primer_378	ATGACTACACGGTCTTGCGG	Panulirus_argus_Reverse_Primer_378	CAAAGCAACTGAAGTGTTGGC	109
379	TG(38)	Panulirus_argus_Forward_Primer_379	CTGTCGTGTTGCTCTGCTGC	Panulirus_argus_Reverse_Primer_379	CATGGGTTGTGTACGAACGG	110
380	TG(18)	Panulirus_argus_Forward_Primer_380	TCAATCTTCTTTTAATGCACTCTTCC	Panulirus_argus_Reverse_Primer_380	GTGACCAAGAGGATGGCAGC	111
381	TG(12)	Panulirus_argus_Forward_Primer_381	TGTGTGTGTCCGGATTAGGG	Panulirus_argus_Reverse_Primer_381	AGGCAACACAAGGCCATACC	112
382	TG(14)	Panulirus_argus_Forward_Primer_382	CAGTTTGGGAGCATGTGTGG	Panulirus_argus_Reverse_Primer_382	CGAGTGTAAAACTCTCCCCACG	113
383	AG(52)	Panulirus_argus_Forward_Primer_383	GACAGCGTGGACATCACTGC	Panulirus_argus_Reverse_Primer_383	ATAAGTGAGCAACGGACCCC	114
384	TG(14)	Panulirus_argus_Forward_Primer_384	ATGTTCACTGCCGTGTGACC	Panulirus_argus_Reverse_Primer_384	GCACCTCTCAACCACAGACG	115
385	TG(22)	Panulirus_argus_Forward_Primer_385	GAGGGCATCCTGACACACC	Panulirus_argus_Reverse_Primer_385	CTTCGCTCATTCCATCCACC	116
386	TC(12)	Panulirus_argus_Forward_Primer_386	AGCCACCACTGCTACTGTCC	Panulirus_argus_Reverse_Primer_386	GAGGTCACATCGACCCTTCC	117
387	AG(28)	Panulirus_argus_Forward_Primer_387	TGGAGAGATGTAGGCTCGGG	Panulirus_argus_Reverse_Primer_387	CTTCAGCGAAGGCTGTTGG	118
388	TG(16)	Panulirus_argus_Forward_Primer_388	TTCTGGACTCTTTGTAGGTGTTCC	Panulirus_argus_Reverse_Primer_388	TCCGAACTAGCTCCTCATGC	119
389	TG(36)	Panulirus_argus_Forward_Primer_389	TGTAAGTGGATACATTAGTCTTGTTCG	Panulirus_argus_Reverse_Primer_389	TTTGTCGTCCATTGTCACCC	120
390	TG(20)	Panulirus_argus_Forward_Primer_390	AGGAGCACTTGGACCGTACC	Panulirus_argus_Reverse_Primer_390	CCTGCTTCAGCTGGACACC	121
391	TG(18)	Panulirus_argus_Forward_Primer_391	AATGTTATCTCCGCCTTGCC	Panulirus_argus_Reverse_Primer_391	AATGAGGGAACTGCTCACCG	122
392	TG(26)	Panulirus_argus_Forward_Primer_392	ATTCGAACCCTGGATAGGGC	Panulirus_argus_Reverse_Primer_392	TTTGAAATCGAGACGGGAGG	123
393	TC(18)	Panulirus_argus_Forward_Primer_393	GACAAAACCCCTTTTGCCG	Panulirus_argus_Reverse_Primer_393	ATGAAAGCGAGGACTGGCG	124
394	AT(14)	Panulirus_argus_Forward_Primer_394	GGTTCTCCCAAGATGAACCG	Panulirus_argus_Reverse_Primer_394	AAGAGTGGGGCAACATACGG	125
395	TG(12)	Panulirus_argus_Forward_Primer_395	CCGGAAAATAAAACATGAGTGC	Panulirus_argus_Reverse_Primer_395	TTTATATCTGCCACCCAGGC	126
396	AT(12)	Panulirus_argus_Forward_Primer_396	GTGCCTTCGTCCATGACACC	Panulirus_argus_Reverse_Primer_396	TGACAAGAACCTGGATTTAAAGAGG	127
397	TG(22)	Panulirus_argus_Forward_Primer_397	TGTACCTAGGCTGGTTCGGG	Panulirus_argus_Reverse_Primer_397	GTGGCTGTCCGATACTGACG	128
398	AG(40)	Panulirus_argus_Forward_Primer_398	TCATTCTGAGGTGAGACGCC	Panulirus_argus_Reverse_Primer_398	GACTGTGTGTGTGCCTTCGG	129
399	TG(30)	Panulirus_argus_Forward_Primer_399	CATTCACATTCGAAGCGAGG	Panulirus_argus_Reverse_Primer_399	AACTTCTGCAGCTCCAAGGC	130
400	TG(22)	Panulirus_argus_Forward_Primer_400	CCAGCTTATCTGACCCAGCC	Panulirus_argus_Reverse_Primer_400	AACGAGGTACAGAGGCGAGC	131
401	TG(12)	Panulirus_argus_Forward_Primer_401	CTCGCTCACACCGACTTACC	Panulirus_argus_Reverse_Primer_401	ATACCCCAACACAACAGCCC	132
402	TC(34)	Panulirus_argus_Forward_Primer_402	AAGCGAGATTAATGGCGGG	Panulirus_argus_Reverse_Primer_402	AGTGCATTCGAGATTTCGCC	133
403	TG(38)	Panulirus_argus_Forward_Primer_403	ATTGGGTTATGAGGGATGGG	Panulirus_argus_Reverse_Primer_403	AGATAGTTTTGGAGAGCATGAGG	134
404	AG(44)	Panulirus_argus_Forward_Primer_404	CATCTGCATATGCTCACGGG	Panulirus_argus_Reverse_Primer_404	TCTTATCCTCGTGACCTTTAACCC	135
405	TC(12)	Panulirus_argus_Forward_Primer_405	CGATTGAGCTGAAATGGAAGC	Panulirus_argus_Reverse_Primer_405	GGATGGTTGCACAATTCTCTCC	136
406	AG(40)	Panulirus_argus_Forward_Primer_406	CTTACCGAGCAGCCTTGACC	Panulirus_argus_Reverse_Primer_406	ACTGTCCACAGGAAGGCAGG	137
407	TG(36)	Panulirus_argus_Forward_Primer_407	CTCTGGGAGTCCCTGGTAGG	Panulirus_argus_Reverse_Primer_407	CTGGCAGTTAGCACCGTAGC	138
408	AG(12)	Panulirus_argus_Forward_Primer_408	TGCAGTAATGGGGTTAGGGC	Panulirus_argus_Reverse_Primer_408	TGATGCGCTGTTCATTGTAGC	139
409	TC(28)	Panulirus_argus_Forward_Primer_409	GTTCACACGCTGTTGCTGC	Panulirus_argus_Reverse_Primer_409	CAACACGCTTCATCTGGTGG	140
410	TG(34)	Panulirus_argus_Forward_Primer_410	GTTTTACAACCAGGGATGCG	Panulirus_argus_Reverse_Primer_410	TGACGTGTATGATGACCTGGC	141
411	TG(40)	Panulirus_argus_Forward_Primer_411	TTGCCATGTGTAAAATTTGTTCG	Panulirus_argus_Reverse_Primer_411	CGTGTGAGTTAGGTGGGTGG	142
412	AG(14)	Panulirus_argus_Forward_Primer_412	GCCTCACAACTGTGGTCACTACC	Panulirus_argus_Reverse_Primer_412	TGTGGCTTCTGGCTACTTTCG	143
413	AG(52)	Panulirus_argus_Forward_Primer_413	TGACAGTCCGCTTGAAATGC	Panulirus_argus_Reverse_Primer_413	TTTTACAAGCCGCTCTTCCC	144
414	TG(30)	Panulirus_argus_Forward_Primer_414	CGAGGGTAATACCTCCCTCCC	Panulirus_argus_Reverse_Primer_414	GCGAGATACTCTCACCTCGCC	145
415	TG(12)	Panulirus_argus_Forward_Primer_415	TGATATGAGTAGCTGTGCTCCG	Panulirus_argus_Reverse_Primer_415	TTTTGAAACCAGGGATGTGG	146
416	AG(54)	Panulirus_argus_Forward_Primer_416	CTTGGACCTTGGTTCTGTGC	Panulirus_argus_Reverse_Primer_416	AAGGAACATCAGAAGGGACAGC	147
417	AG(18)	Panulirus_argus_Forward_Primer_417	AAAACGCAACTTCACATCGG	Panulirus_argus_Reverse_Primer_417	TCAAGAGAGAGAAGTTGGTGCC	148
418	TG(20)	Panulirus_argus_Forward_Primer_418	ATGGCAGAGGAGCGATAAGG	Panulirus_argus_Reverse_Primer_418	TGCCGACTTTGTCAATAACCC	149
419	TG(40)	Panulirus_argus_Forward_Primer_419	GAATACATAGTCGTGTTGTCGGG	Panulirus_argus_Reverse_Primer_419	AAAAGTGCTGGTCTTTGTAGAGC	150
420	AG(52)	Panulirus_argus_Forward_Primer_420	ATTTTCCCCAATCTCTCCCG	Panulirus_argus_Reverse_Primer_420	GAAGATAATGAGGCCGCAGG	151
421	AT(58)	Panulirus_argus_Forward_Primer_421	ACAATAACTGAGTTGCGCCG	Panulirus_argus_Reverse_Primer_421	TAGCAATCGAGCCTCCAACC	152
422	TG(12)	Panulirus_argus_Forward_Primer_422	GTGTTCGTGGCAGAGTGTGG	Panulirus_argus_Reverse_Primer_422	GAAGCATCGTGTAAGGTGCG	153
423	TG(16)	Panulirus_argus_Forward_Primer_423	TTCGCAACATTACCAACACG	Panulirus_argus_Reverse_Primer_423	TGTAGGTTTGACGGCCAGG	154
424	TG(28)	Panulirus_argus_Forward_Primer_424	CTTGCCCTCCAAAGTGAACC	Panulirus_argus_Reverse_Primer_424	TGAACAGATGGTACCCAGCG	155
425	TG(28)	Panulirus_argus_Forward_Primer_425	GTACCAGTGGGTCTTTCGGG	Panulirus_argus_Reverse_Primer_425	CTCCCTTCTCGGTGGTCG	156
426	AG(26)	Panulirus_argus_Forward_Primer_426	GATGGCGCCCACCTTACC	Panulirus_argus_Reverse_Primer_426	ACAATTAGTGCCGTTTCGGG	157
427	AG(30)	Panulirus_argus_Forward_Primer_427	CGAAGTCTGCAGTATTGAAAGCC	Panulirus_argus_Reverse_Primer_427	AGGAGGAAGGACAAATCGCC	158
428	AT(56)	Panulirus_argus_Forward_Primer_428	AAATTGCCTTATTACACACAAAAGC	Panulirus_argus_Reverse_Primer_428	CTGAGGTCATAGCACCGGG	159
429	AG(28)	Panulirus_argus_Forward_Primer_429	TTCATTTCTTAGTAAACCACAGACGG	Panulirus_argus_Reverse_Primer_429	CAATTTGGTCGACGCTTTGG	160
430	TG(22)	Panulirus_argus_Forward_Primer_430	CTTGTTGACGTTTTCCCACC	Panulirus_argus_Reverse_Primer_430	GCGGCTAAAACAATGATTCC	161
431	TC(16)	Panulirus_argus_Forward_Primer_431	CTCCAGCTTCCCACTTTTCC	Panulirus_argus_Reverse_Primer_431	TTTTAGAGCCCAGGGGAACC	162
432	TG(62)	Panulirus_argus_Forward_Primer_432	TTGTGGTGAATATGATGATAGCG	Panulirus_argus_Reverse_Primer_432	AAAATGACTACCATTGGAAAATTCG	163
433	AG(14)	Panulirus_argus_Forward_Primer_433	TTACGCCCATCCTTTTCTCG	Panulirus_argus_Reverse_Primer_433	CAGAAGTGAAGATCGTGGCG	164
434	AG(32)	Panulirus_argus_Forward_Primer_434	CACAACAGGTAATTATACCCCGC	Panulirus_argus_Reverse_Primer_434	TCTCGGTAAATGGAATCGGG	165
435	AG(26)	Panulirus_argus_Forward_Primer_435	ACGACGACGCTTCCAGTAGG	Panulirus_argus_Reverse_Primer_435	GAAAGAGGAGGAAACGCAGC	166
436	TG(26)	Panulirus_argus_Forward_Primer_436	GTTGGCCGAGCCAGTAGG	Panulirus_argus_Reverse_Primer_436	TTGCCTGGAACTCAAAGACG	167
437	AG(12)	Panulirus_argus_Forward_Primer_437	TGTTCACATGGTACTTTCGGC	Panulirus_argus_Reverse_Primer_437	CTCGCGTACAGAGGGATGG	168
438	TG(20)	Panulirus_argus_Forward_Primer_438	ACCCGAGAGTCTGTCATCCG	Panulirus_argus_Reverse_Primer_438	CGCGTTCAACAACTTGGG	169
439	TG(12)	Panulirus_argus_Forward_Primer_439	GGGACAAACTAAATAAAGACAAGAGAGC	Panulirus_argus_Reverse_Primer_439	GAACAGCCTTGGTTATGGCG	170
440	AG(12)	Panulirus_argus_Forward_Primer_440	TGTACACACGACAACATACAAACG	Panulirus_argus_Reverse_Primer_440	CTCTCGCCTCTTTCGGTAGC	171
441	AG(40)	Panulirus_argus_Forward_Primer_441	CTCTGAGCGCTACAAGAGCC	Panulirus_argus_Reverse_Primer_441	TCGACTGTCGGCAATACAGC	172
442	TG(16)	Panulirus_argus_Forward_Primer_442	GCCTTGGTTTGTCTTCAGCC	Panulirus_argus_Reverse_Primer_442	CGTGTGCATGTGAGTGAATGG	173
443	AG(30)	Panulirus_argus_Forward_Primer_443	TGCCGTAGGAGTCTCTTCCC	Panulirus_argus_Reverse_Primer_443	ATTCTCCCAGCGTATGCACC	174
444	AG(50)	Panulirus_argus_Forward_Primer_444	ACGTCCAGCCTACAAGAGGG	Panulirus_argus_Reverse_Primer_444	AGTGCAGGAGGTGACGTGG	175
445	TG(42)	Panulirus_argus_Forward_Primer_445	TGCGTATGTTATGTTCTTAGACGG	Panulirus_argus_Reverse_Primer_445	TTCATCGAATGGTGCAAAGG	176
446	TG(16)	Panulirus_argus_Forward_Primer_446	TGTAAGTACGTATATTCGTGAGTGCG	Panulirus_argus_Reverse_Primer_446	TGCCCATAGCAGTAAGTGGG	177
447	AG(70)	Panulirus_argus_Forward_Primer_447	TGTAATGAGAGATGGCACCAGG	Panulirus_argus_Reverse_Primer_447	GTTGGTTGGCTCATCCATCG	178
448	TG(12)	Panulirus_argus_Forward_Primer_448	GCCACCGACACACTTACACC	Panulirus_argus_Reverse_Primer_448	CTAAGAGGCTGCTGGATGGG	179
449	TG(18)	Panulirus_argus_Forward_Primer_449	CTGGAAATGGTGTAGCGTCG	Panulirus_argus_Reverse_Primer_449	CAGCGTATCTTCAGGCATCG	180
450	AG(58)	Panulirus_argus_Forward_Primer_450	TTACCAGTGTGAAGCAAGACCC	Panulirus_argus_Reverse_Primer_450	CACCATGGATGCTTCCCC	181
451	TG(12)	Panulirus_argus_Forward_Primer_451	TAGAGCAATGAGCGCAAACG	Panulirus_argus_Reverse_Primer_451	TTCTGGGGCCGTGTAGTAGG	182
452	TG(38)	Panulirus_argus_Forward_Primer_452	TGGAAGATTTATATAGGGGTAAACTGG	Panulirus_argus_Reverse_Primer_452	TCATCTTCGCTTCATGCTCG	183
453	AG(12)	Panulirus_argus_Forward_Primer_453	TAACGAACACACTGAGGGCG	Panulirus_argus_Reverse_Primer_453	AAGTTACGGTGTGGCAAGGG	184
454	TG(32)	Panulirus_argus_Forward_Primer_454	TCACGAGAACAAGACTACAAAACG	Panulirus_argus_Reverse_Primer_454	CGTACGTGTGTTTCTCATCTCC	185
455	TG(24)	Panulirus_argus_Forward_Primer_455	CTGTATTTCCTCAGTGGTGGC	Panulirus_argus_Reverse_Primer_455	TATCAGGTGAGGTGAACCCG	186
456	AT(24)	Panulirus_argus_Forward_Primer_456	CACCATAACTGCCATCACGG	Panulirus_argus_Reverse_Primer_456	GCAGGAAATCTAATTACGAAGAACG	187
457	AG(20)	Panulirus_argus_Forward_Primer_457	CCAACGATCATCAGACACGC	Panulirus_argus_Reverse_Primer_457	GTGCATCCAATAAGACAATTACCC	188
458	TC(12)	Panulirus_argus_Forward_Primer_458	ACACACACACGCGTAAACCC	Panulirus_argus_Reverse_Primer_458	ACAGAGACACGGAACGAACG	189
459	TC(18)	Panulirus_argus_Forward_Primer_459	TGTATAACCCAGAGCCACACG	Panulirus_argus_Reverse_Primer_459	TCGTCATCATCAATATGGTGG	190
460	TG(14)	Panulirus_argus_Forward_Primer_460	TTGGGTTAAGCGAGGTCAGG	Panulirus_argus_Reverse_Primer_460	GGGCTGTACACCGTCTGTGG	191
461	TC(58)	Panulirus_argus_Forward_Primer_461	CATTAATTATGAACCTTGAGAGACGG	Panulirus_argus_Reverse_Primer_461	CGCAGGATACTGTACGGATTAGG	192
462	TG(40)	Panulirus_argus_Forward_Primer_462	TCTCGGTCCTCTCCTTGACC	Panulirus_argus_Reverse_Primer_462	GCTGACCGAGTTAGAATGTTGC	193
463	TC(18)	Panulirus_argus_Forward_Primer_463	TTCTACCGTTCCCCGTTACC	Panulirus_argus_Reverse_Primer_463	CAGTCACACAGTCAACCTAATCACC	194
464	TC(58)	Panulirus_argus_Forward_Primer_464	ATCAAGGCGGATGAGACTGG	Panulirus_argus_Reverse_Primer_464	GATAGGGTGGTGAAGGACGC	195
465	AG(30)	Panulirus_argus_Forward_Primer_465	GAAATATGCAAGACGCGAGG	Panulirus_argus_Reverse_Primer_465	TCGCGAGAGAAGATGAAAAGC	196
466	TG(42)	Panulirus_argus_Forward_Primer_466	TCACCCACTTCCTACAACGC	Panulirus_argus_Reverse_Primer_466	CTGTTCATGCATTCGTCAGC	197
467	TG(40)	Panulirus_argus_Forward_Primer_467	TGTCTCGTCAAGTGAGGGAGG	Panulirus_argus_Reverse_Primer_467	ATTTGCCTCTACGTCCCAGG	198
468	AG(16)	Panulirus_argus_Forward_Primer_468	AGAACAAGACGGCATGACCC	Panulirus_argus_Reverse_Primer_468	ATCAATCACCGGCTTCAACC	199
469	TG(18)	Panulirus_argus_Forward_Primer_469	GCACGTGTACAGACAAACGC	Panulirus_argus_Reverse_Primer_469	GTTGTCTGTCAGAATCAAACTATAATACC	200
470	TG(30)	Panulirus_argus_Forward_Primer_470	GGCCGACTTCCTATAAGGGC	Panulirus_argus_Reverse_Primer_470	CATCACGGTAGAGACGGACG	201
471	TG(16)	Panulirus_argus_Forward_Primer_471	GATTGTTCCGAGTGTTCTGTCG	Panulirus_argus_Reverse_Primer_471	CGGCAAACAATTCATCTTTCC	202
472	AT(12)	Panulirus_argus_Forward_Primer_472	AACCCAGCTGTCATCCATCC	Panulirus_argus_Reverse_Primer_472	GAACCTACGTGCTTGACCCC	203
473	TC(48)	Panulirus_argus_Forward_Primer_473	CTGGTCCCTTGATGTTTCGC	Panulirus_argus_Reverse_Primer_473	TTGACTCCTGAACACGACGG	204
474	TG(18)	Panulirus_argus_Forward_Primer_474	ACATGCGCAGTAACACCTGC	Panulirus_argus_Reverse_Primer_474	TGTGTAACTCTGTGAAGGCGG	205
475	AT(14)	Panulirus_argus_Forward_Primer_475	ATCCTCTGGTGCGAGAGCC	Panulirus_argus_Reverse_Primer_475	ACTTGACCGCTGGTTATGGC	206
476	TG(42)	Panulirus_argus_Forward_Primer_476	CCGTTGCACAGGTCTATTGC	Panulirus_argus_Reverse_Primer_476	GGCGATTCATTTGTATGTATCTTGC	207
477	TG(24)	Panulirus_argus_Forward_Primer_477	TCCCAGAGGCTTAGGACAGG	Panulirus_argus_Reverse_Primer_477	GGTATGGTTGGCTCCTGTGG	208
478	TG(14)	Panulirus_argus_Forward_Primer_478	TTCGACTCCCTCGAAACAGC	Panulirus_argus_Reverse_Primer_478	GGAGGTGGAGAGTGTGTGCC	209
479	AG(12)	Panulirus_argus_Forward_Primer_479	ACGTGTTGTCAAGTGTCGGG	Panulirus_argus_Reverse_Primer_479	AGGACAACAATGCAACGGG	210
480	AG(12)	Panulirus_argus_Forward_Primer_480	CACACACTCCAGCCAGAAGC	Panulirus_argus_Reverse_Primer_480	GTGTCACTGTGGCCAAGCC	211
481	AG(12)	Panulirus_argus_Forward_Primer_481	TACAAATACCCGGTGATGCG	Panulirus_argus_Reverse_Primer_481	TGGAGCAAAAGAGAAAGGGG	212
482	TG(14)	Panulirus_argus_Forward_Primer_482	AATCCGTCGTATGGAATCAGG	Panulirus_argus_Reverse_Primer_482	TTTTGTTCTGTGCGTGCG	213
483	TG(14)	Panulirus_argus_Forward_Primer_483	GACTCAGAGGCCTTTGTCCG	Panulirus_argus_Reverse_Primer_483	CAGTCTGATCGTCCACCAGG	214
484	AT(40)	Panulirus_argus_Forward_Primer_484	TCACACATATTTGGCGAGGC	Panulirus_argus_Reverse_Primer_484	TCCTTATTATTCTACAACTTTTGGGC	215
485	TG(14)	Panulirus_argus_Forward_Primer_485	GTGTTACGAATACATGGTTTGGG	Panulirus_argus_Reverse_Primer_485	GCAAGTCTGGCTGAACTTTCC	216
486	AT(28)	Panulirus_argus_Forward_Primer_486	AAGAAAGGGGTGGAAGAGGG	Panulirus_argus_Reverse_Primer_486	CTCTTCCGTGGAGAGAGGGG	217
487	TG(24)	Panulirus_argus_Forward_Primer_487	CGAAGGCGAGATCATAGCG	Panulirus_argus_Reverse_Primer_487	GGGATAGCATACACGGCAGG	218
488	TG(16)	Panulirus_argus_Forward_Primer_488	GGCCAAACTTCTCAACCAGC	Panulirus_argus_Reverse_Primer_488	GCCTACAGAACTGGAACCACG	219
489	TG(12)	Panulirus_argus_Forward_Primer_489	TTAGTTGAGCCTAACGAGGCG	Panulirus_argus_Reverse_Primer_489	TTACGTGTAGCTTCGCACCC	220
490	TG(26)	Panulirus_argus_Forward_Primer_490	GTAGTCGCTGTTGGTCGTGG	Panulirus_argus_Reverse_Primer_490	TCTTCAAACAAGCTCAGGCG	221
491	TG(20)	Panulirus_argus_Forward_Primer_491	TTCGACATCTCTTAGCACCCC	Panulirus_argus_Reverse_Primer_491	AGGGTCTTGCAGTCTCGCC	222
492	AG(20)	Panulirus_argus_Forward_Primer_492	AAAAGACGGTGTGGGTCTGG	Panulirus_argus_Reverse_Primer_492	ACTCCTGCAAAGTTCTCGGG	223
493	TG(28)	Panulirus_argus_Forward_Primer_493	GGTATGGAAAACTGATGATGTTCG	Panulirus_argus_Reverse_Primer_493	AAGCTCACTAAAGTAAACAGATGTAAACC	224
494	AG(38)	Panulirus_argus_Forward_Primer_494	TTTTGTTCCTTATTCCTCCTCCC	Panulirus_argus_Reverse_Primer_494	AGACAAGAGGCATGCAAAGG	225
495	AG(54)	Panulirus_argus_Forward_Primer_495	GCAGGGAAGAAGGATATGCG	Panulirus_argus_Reverse_Primer_495	GAAGATGACCAGCACTGCCC	226
496	TC(64)	Panulirus_argus_Forward_Primer_496	CATGGCACCCGATTACTGG	Panulirus_argus_Reverse_Primer_496	GTGGCACTTGGACCGTTAGC	227
497	TG(22)	Panulirus_argus_Forward_Primer_497	GGCCTGAAGCAGTGGAGC	Panulirus_argus_Reverse_Primer_497	ACCGCAGATCACACAGCG	228
498	AT(12)	Panulirus_argus_Forward_Primer_498	TGTCCCTAGGACACAATCACG	Panulirus_argus_Reverse_Primer_498	TTCAAAGCGTGATACGGACG	229
499	AT(26)	Panulirus_argus_Forward_Primer_499	CCCTATTGGCAGTTGGTTGG	Panulirus_argus_Reverse_Primer_499	CAGTTTGCACACTCTTCACCG	230
500	TG(22)	Panulirus_argus_Forward_Primer_500	TTTTACTCCTCTCCCCGTCC	Panulirus_argus_Reverse_Primer_500	TCATTTCTTTCGTCCATTTGC	231
501	TG(18)	Panulirus_argus_Forward_Primer_501	CTCGCGTCTGTTGACTAGCG	Panulirus_argus_Reverse_Primer_501	TGTCCTCTCGTGTCTCTCGG	232
502	AG(22)	Panulirus_argus_Forward_Primer_502	GAAATGGCTGGACAAACGC	Panulirus_argus_Reverse_Primer_502	GAGGCATCACCACCTGAACC	233
503	TG(18)	Panulirus_argus_Forward_Primer_503	AACTGTGGGATCAGGTTCGG	Panulirus_argus_Reverse_Primer_503	AGGTTTGAAGCCGAAAGGG	234
504	AG(22)	Panulirus_argus_Forward_Primer_504	GGAAGAGAAAGCGAGCGAGC	Panulirus_argus_Reverse_Primer_504	CCTTAACACCTGTTGTCAGTCTCG	235
505	TG(32)	Panulirus_argus_Forward_Primer_505	ATTCGGACCAAGACAGAGCC	Panulirus_argus_Reverse_Primer_505	GAAAAGGGGAACCGTTGAGC	236
506	TG(14)	Panulirus_argus_Forward_Primer_506	TTTAGGCCTATTAGACTGCCAGC	Panulirus_argus_Reverse_Primer_506	CACTATCAAACACGCCAACCC	237
507	AT(12)	Panulirus_argus_Forward_Primer_507	AACACAAATCTGTCGTAAGTTCAGC	Panulirus_argus_Reverse_Primer_507	CAAGAACTGTTCAGCGCCC	238
508	AG(38)	Panulirus_argus_Forward_Primer_508	ACAGAGATTACATAATATTTCCCTTCG	Panulirus_argus_Reverse_Primer_508	GATGGCCTCTCTAACTTTGCG	239
509	AG(36)	Panulirus_argus_Forward_Primer_509	GGGCTTACTAGAGACGAGGGG	Panulirus_argus_Reverse_Primer_509	ATGTGTCTTGCTGCTGAGGG	240
510	AT(22)	Panulirus_argus_Forward_Primer_510	TTCCTTGAGGTTGTGATAGCG	Panulirus_argus_Reverse_Primer_510	AGCATATCCCAAGACCCACC	241
511	TG(12)	Panulirus_argus_Forward_Primer_511	AAGTGTCTTCCATCGAGCCG	Panulirus_argus_Reverse_Primer_511	GCGTTCGCACTTCACACC	242
512	AG(14)	Panulirus_argus_Forward_Primer_512	ACACTGATGGCACGTATGGC	Panulirus_argus_Reverse_Primer_512	CCAGTGCATCTACTTCCCTCG	243
513	AG(12)	Panulirus_argus_Forward_Primer_513	CGTCTTTTCCCTCACTCTCCC	Panulirus_argus_Reverse_Primer_513	TGATCCGACACACTAAAACGC	244
514	TG(14)	Panulirus_argus_Forward_Primer_514	TGCCTCCCCGTATTGTATCC	Panulirus_argus_Reverse_Primer_514	GATAATTGCAGCAGTGGGAGG	245
515	TG(12)	Panulirus_argus_Forward_Primer_515	GCAGAACATAGGTGCAGCCC	Panulirus_argus_Reverse_Primer_515	AGGGTGTCACTGTATCTGGGG	246
516	AG(18)	Panulirus_argus_Forward_Primer_516	CGGGTTCTCTTGTATTGAGCG	Panulirus_argus_Reverse_Primer_516	GACGGACAGACTAATTGGAATGG	247
517	TC(48)	Panulirus_argus_Forward_Primer_517	TGCACTACGACTCGTCCCC	Panulirus_argus_Reverse_Primer_517	TCGAGGACGTGAGAGACTGG	248
518	AT(36)	Panulirus_argus_Forward_Primer_518	CAGGGACAGAGCTTCACTACTGG	Panulirus_argus_Reverse_Primer_518	TAGACGGTCCATACCCACCC	249
519	AG(38)	Panulirus_argus_Forward_Primer_519	CGCAAGAAATGAAGAGAACGG	Panulirus_argus_Reverse_Primer_519	TGAGCTTAAGTACAACGGAGCG	250
520	AT(42)	Panulirus_argus_Forward_Primer_520	CATATTTGTTTATCCTCTTAGATTCAAGG	Panulirus_argus_Reverse_Primer_520	CATAACGCTCCTCGATCCG	251
521	AG(16)	Panulirus_argus_Forward_Primer_521	CCAGTGGAAGTAGTCGGCG	Panulirus_argus_Reverse_Primer_521	AAGCTGCTTTGAATGGTCCC	252
522	TG(12)	Panulirus_argus_Forward_Primer_522	CAAAATAGTTTGCATCTGTGCG	Panulirus_argus_Reverse_Primer_522	TACGCGTGACTCAACTTCCC	253
523	TC(34)	Panulirus_argus_Forward_Primer_523	GGTCTCAGATGGAAAGAAGTCG	Panulirus_argus_Reverse_Primer_523	CTCAACTGGAGACACCACGC	254
524	TG(22)	Panulirus_argus_Forward_Primer_524	CAGGACCCTTTTCCATGTGC	Panulirus_argus_Reverse_Primer_524	ACGCCAACAGCTACATCACG	255
525	TG(12)	Panulirus_argus_Forward_Primer_525	CAACGTCTTCACTTCCCAGC	Panulirus_argus_Reverse_Primer_525	TCCACTGACCAGACAGCACC	256
526	TC(14)	Panulirus_argus_Forward_Primer_526	TTTACTTTGTGCGGTGAGCG	Panulirus_argus_Reverse_Primer_526	TGGATTAAATGCAAACAGGTGG	257
527	TC(12)	Panulirus_argus_Forward_Primer_527	CCCTCTCATCAAACCACCC	Panulirus_argus_Reverse_Primer_527	GAGGAAGAGTACGGAAGCAGC	258
528	AT(72)	Panulirus_argus_Forward_Primer_528	CCAGGGAGACTGAGTGACCG	Panulirus_argus_Reverse_Primer_528	GCTTAAGAACCTCTAAGTTATAAGACCTGG	259
529	AG(46)	Panulirus_argus_Forward_Primer_529	GGGAACGTATTGTTCTGGGG	Panulirus_argus_Reverse_Primer_529	GAACGTTAGTGAAGGGTTGCG	260
530	AG(30)	Panulirus_argus_Forward_Primer_530	CACAAACACGCTGGAAAAGC	Panulirus_argus_Reverse_Primer_530	TCTGCTAATGGATGGAACTGC	261
531	TG(14)	Panulirus_argus_Forward_Primer_531	GTCAGGGACACAGTGTTGGG	Panulirus_argus_Reverse_Primer_531	TCCAGAAAACATAACCTCGCC	262
532	AG(20)	Panulirus_argus_Forward_Primer_532	CATGTATCCAAACATCAACCCC	Panulirus_argus_Reverse_Primer_532	ACCGGTGGCTTGTCTTGG	263
533	TG(16)	Panulirus_argus_Forward_Primer_533	CTGGTTGCTGTCGATTCTGC	Panulirus_argus_Reverse_Primer_533	AACACACTAACCCATCCACGC	264
534	TG(16)	Panulirus_argus_Forward_Primer_534	CGCTTTCATAGTGAGGGTGG	Panulirus_argus_Reverse_Primer_534	AATGTAATGACTGACCAATGCG	265
535	TG(28)	Panulirus_argus_Forward_Primer_535	ACAGGACGGTTTTCTGAGCC	Panulirus_argus_Reverse_Primer_535	GTGCGAAAGATCATCGTCCC	266
536	TG(12)	Panulirus_argus_Forward_Primer_536	AACACCTGTGCCTCTCTCCC	Panulirus_argus_Reverse_Primer_536	GATTCAGAGGACCACGAGGC	267
537	TG(26)	Panulirus_argus_Forward_Primer_537	AGGAAATAGCAAACGCAGCC	Panulirus_argus_Reverse_Primer_537	TGGAGGGAGTGAAAATGTTGG	268
538	TG(46)	Panulirus_argus_Forward_Primer_538	TTTCGAAGGACACATCCTGG	Panulirus_argus_Reverse_Primer_538	CGGTCACCACACAAAGAAGC	269
539	AT(30)	Panulirus_argus_Forward_Primer_539	CCTACTGAAGTGCGATTTGGC	Panulirus_argus_Reverse_Primer_539	CAATTAGGGGCGATCAGAGC	270
540	AG(14)	Panulirus_argus_Forward_Primer_540	ATGTGGATGAGGACAAGGGG	Panulirus_argus_Reverse_Primer_540	TCCTGCACTCCTTACCTCGC	271
541	TG(62)	Panulirus_argus_Forward_Primer_541	ACGCTATCCACGGTCTGTCC	Panulirus_argus_Reverse_Primer_541	GAGGACAGTGTGTAAAGGCACG	272
542	TG(22)	Panulirus_argus_Forward_Primer_542	CATGATTCTCAAATGAGTCAAGACC	Panulirus_argus_Reverse_Primer_542	TCACAGAGGAAGCTCATCGC	273
543	TG(26)	Panulirus_argus_Forward_Primer_543	TCCAGACTCAAGTTAAGCACCC	Panulirus_argus_Reverse_Primer_543	AGCATTTGACCACTTTTGGC	274
544	AT(36)	Panulirus_argus_Forward_Primer_544	CACCATGAAACATGTTGTGCC	Panulirus_argus_Reverse_Primer_544	CTGGTTCTACCTCGCTGTCG	275
545	TG(12)	Panulirus_argus_Forward_Primer_545	AATTGGTGATGGGTTTTGGG	Panulirus_argus_Reverse_Primer_545	CCCGCTCTCACATACACACG	276
546	TG(12)	Panulirus_argus_Forward_Primer_546	CTGTGTGGGATGCGTTTAGG	Panulirus_argus_Reverse_Primer_546	CAGAGCCCTCGCAGTTTACC	277
547	AT(44)	Panulirus_argus_Forward_Primer_547	CAGTCCACATTTGTAACTCGCC	Panulirus_argus_Reverse_Primer_547	CAAAGAACCACACATTACTATTTTGG	278
548	AT(50)	Panulirus_argus_Forward_Primer_548	TGTGAGTGTGTGTGTTCGCC	Panulirus_argus_Reverse_Primer_548	TTTGAAGGTATGACATTTTGAACG	279
549	TC(58)	Panulirus_argus_Forward_Primer_549	ATACTTATCTGAATGTCTCATTTCTAAGC	Panulirus_argus_Reverse_Primer_549	AAATAGCATCACGGACTCCC	280
550	TC(12)	Panulirus_argus_Forward_Primer_550	GGAACCAGTCAACCACAGGG	Panulirus_argus_Reverse_Primer_550	TATCGCCCTCGTATGTGTCG	281
551	AG(28)	Panulirus_argus_Forward_Primer_551	CATTGGTTGACCTAAAGAGTGACG	Panulirus_argus_Reverse_Primer_551	CGTTCCAGCAAGTATTCTCCG	282
552	AT(42)	Panulirus_argus_Forward_Primer_552	TGGGTAAAACTTGGCACACG	Panulirus_argus_Reverse_Primer_552	TGACCTGCCCTTTACCAACC	283
553	AG(22)	Panulirus_argus_Forward_Primer_553	TCCTCTTTCATCCAACATGCC	Panulirus_argus_Reverse_Primer_553	AGAGCTCCCAGCTTCTGTCC	284
554	AT(24)	Panulirus_argus_Forward_Primer_554	ACAACGCTAATGCTGAACCG	Panulirus_argus_Reverse_Primer_554	GCTCTGCTATGATCGCCTCC	285
555	AG(58)	Panulirus_argus_Forward_Primer_555	CGTCTGATGGTGAGTGCAGG	Panulirus_argus_Reverse_Primer_555	ATTTGCCAAAATATATGCGCC	286
556	AG(46)	Panulirus_argus_Forward_Primer_556	CATCCTTCACTAACTCCCCG	Panulirus_argus_Reverse_Primer_556	TGTTGTCTCTTCTTCCTATGCG	287
557	AG(12)	Panulirus_argus_Forward_Primer_557	TACTCTGCTTTTGGCTGGGG	Panulirus_argus_Reverse_Primer_557	TTATCTCGCTTCTTTCCACGC	288
558	TG(16)	Panulirus_argus_Forward_Primer_558	GCCAGGCCTTAGCCTACC	Panulirus_argus_Reverse_Primer_558	AATCTAAGCTGTTGAGTGATTATTGC	289
559	AG(28)	Panulirus_argus_Forward_Primer_559	ATACCCGCAAAACTGAACGG	Panulirus_argus_Reverse_Primer_559	GAGATATAAGCTGGAGCCTGACC	290
560	AG(42)	Panulirus_argus_Forward_Primer_560	AGTTTCCGGTACCAAGCTGC	Panulirus_argus_Reverse_Primer_560	GGAAATCGCCTCTCATCAGG	291
561	TG(12)	Panulirus_argus_Forward_Primer_561	CTGGAAAAGGACACACACGC	Panulirus_argus_Reverse_Primer_561	AAGGAGACAGACGAGACGCC	292
562	AG(20)	Panulirus_argus_Forward_Primer_562	GATCTAGCGGCACTATCCTACG	Panulirus_argus_Reverse_Primer_562	CCTGTTGCCTTTAGGCTTCG	293
563	TG(18)	Panulirus_argus_Forward_Primer_563	TGACGATGGCATCAAAATGG	Panulirus_argus_Reverse_Primer_563	GCAGAGTACGGTCGTTTACTCG	294
564	TG(16)	Panulirus_argus_Forward_Primer_564	CAGGGAGGTCACGACAACG	Panulirus_argus_Reverse_Primer_564	GAGATTAACGTACTGGTCTGCTTCC	295
565	AT(14)	Panulirus_argus_Forward_Primer_565	TCCTGTTTTCTGTGGGTGGG	Panulirus_argus_Reverse_Primer_565	AGGTTGGATGATGCACTGCG	296
566	TG(12)	Panulirus_argus_Forward_Primer_566	TGCTTGATCGCCTTTTACTGG	Panulirus_argus_Reverse_Primer_566	TGCTTACAGCTTCTTACTTTTCGG	297
567	TG(20)	Panulirus_argus_Forward_Primer_567	CAGCAGCGTCAACACAGAGC	Panulirus_argus_Reverse_Primer_567	ACTATGGAACAAAGCGCATCC	298
568	TG(18)	Panulirus_argus_Forward_Primer_568	AAACATGGTTCTTTAATTTGTAAGGG	Panulirus_argus_Reverse_Primer_568	TCGGAGAAAGATCAGAAGCG	299
569	TG(20)	Panulirus_argus_Forward_Primer_569	TCCGTACGATGGGAAGTTGC	Panulirus_argus_Reverse_Primer_569	GAGGGAGGTCAGGTCCAGC	300
570	AG(70)	Panulirus_argus_Forward_Primer_570	ATGGCTTAATGCATGGCCG	Panulirus_argus_Reverse_Primer_570	AGTGACGTGTGAGGGGAAGC	301
571	TG(18)	Panulirus_argus_Forward_Primer_571	ATCCCATCGTTCACGACAGC	Panulirus_argus_Reverse_Primer_571	AGCACTTGCTACTCCCAGGC	302
572	AG(32)	Panulirus_argus_Forward_Primer_572	CCTAAAGTTCGGGTGCAAGC	Panulirus_argus_Reverse_Primer_572	CTGATGTCTCGATCCCTCCC	303
573	AT(16)	Panulirus_argus_Forward_Primer_573	CAGTTTATCCAATGGCGACG	Panulirus_argus_Reverse_Primer_573	TGCAGTGAAAAGTTGTCGTGG	304
574	TG(44)	Panulirus_argus_Forward_Primer_574	CACGTTAGTACTGCCAATAGGTCG	Panulirus_argus_Reverse_Primer_574	GTGGGGCTAGAAAATGGACG	305
575	TG(32)	Panulirus_argus_Forward_Primer_575	GCGAGTAGAGTCAGACTTGGGG	Panulirus_argus_Reverse_Primer_575	GGCTGAGGGTTTTAAGTGGG	306
576	AG(24)	Panulirus_argus_Forward_Primer_576	CAGCTTTATTCCGAGGACCG	Panulirus_argus_Reverse_Primer_576	TCGAGGTTTGAACGTTAGATGC	307
577	TG(18)	Panulirus_argus_Forward_Primer_577	CTGGATGAGGGGTCCTGG	Panulirus_argus_Reverse_Primer_577	CGAAGCGAGACGATAGTTGG	308
578	TC(36)	Panulirus_argus_Forward_Primer_578	GTAGGCACCACCCTCCCC	Panulirus_argus_Reverse_Primer_578	GATGCTCCTCCTGACGAAGG	309
579	TG(22)	Panulirus_argus_Forward_Primer_579	TATACACTTGGCTGCCGGG	Panulirus_argus_Reverse_Primer_579	AGGAGGAGGTGGTAGCAAGC	310
580	AG(42)	Panulirus_argus_Forward_Primer_580	TCATGACTCCTCGTCTTCCG	Panulirus_argus_Reverse_Primer_580	TTTTGCCAGAGACTTGGACG	311
581	AG(70)	Panulirus_argus_Forward_Primer_581	GCTGTCATGTCTCGCCCC	Panulirus_argus_Reverse_Primer_581	TCTGCATGGGTGTACATACCTACC	312
582	TG(52)	Panulirus_argus_Forward_Primer_582	ACAAATGCCCTGCTCTCTCC	Panulirus_argus_Reverse_Primer_582	ATGTCAACCAGCCAACCACC	313
583	TG(22)	Panulirus_argus_Forward_Primer_583	GCACGGTACAGAAACACTCCC	Panulirus_argus_Reverse_Primer_583	TGGGTTAGTCGATCAATGGG	314
584	TG(18)	Panulirus_argus_Forward_Primer_584	TACGACCGAGAGAACGACCC	Panulirus_argus_Reverse_Primer_584	ACGATGGTGACCTTCCACG	315
585	TG(40)	Panulirus_argus_Forward_Primer_585	CGCATAACACAAAATATAGAGAAAGAGC	Panulirus_argus_Reverse_Primer_585	GCGTGATCGTTTCCGTCC	316
586	TC(26)	Panulirus_argus_Forward_Primer_586	AGTGGAGGAGAAGCATTGGG	Panulirus_argus_Reverse_Primer_586	TTTCGCTCTGCAAAGTCAGG	317
587	AG(58)	Panulirus_argus_Forward_Primer_587	GATTGGAAAGTCGGAGGAGG	Panulirus_argus_Reverse_Primer_587	AGATCCGATTCCCTGTCTCG	318
588	TG(40)	Panulirus_argus_Forward_Primer_588	AGGGTTGGTGGATGTTGTGG	Panulirus_argus_Reverse_Primer_588	CTTGCGTTTCTGTGTGTCGG	319
589	AT(24)	Panulirus_argus_Forward_Primer_589	TTGTTTCTACTCTCTTATCACTTCATCC	Panulirus_argus_Reverse_Primer_589	TACATGGTTGAGTGGAAGGC	320
590	AT(20)	Panulirus_argus_Forward_Primer_590	GCTGGAGAGGTCTAGTGCCG	Panulirus_argus_Reverse_Primer_590	TAGTCGCCACCTACGACACG	321
591	TG(14)	Panulirus_argus_Forward_Primer_591	CAAATGCATATACACAAACACGC	Panulirus_argus_Reverse_Primer_591	TCGCATTTACATTTTCGAGGG	322
592	TG(12)	Panulirus_argus_Forward_Primer_592	GAGGCCAAGCAAGCTGTAGG	Panulirus_argus_Reverse_Primer_592	CAGACAGACATCACACCGGG	323
593	TG(38)	Panulirus_argus_Forward_Primer_593	AGCACTGTGTCCCTGTGTCC	Panulirus_argus_Reverse_Primer_593	GTCACGAGTGACGGGAAGG	324
594	AG(22)	Panulirus_argus_Forward_Primer_594	GTACCTCCCCTGCTGACACC	Panulirus_argus_Reverse_Primer_594	TGGCACTCGAGAGATGATGG	325
595	AG(46)	Panulirus_argus_Forward_Primer_595	TCAGGTCCGTGGATATGTAGG	Panulirus_argus_Reverse_Primer_595	AGCACATTATTCCCTTCCGC	326
596	TG(22)	Panulirus_argus_Forward_Primer_596	ACCACTTACCAATCTGCCCC	Panulirus_argus_Reverse_Primer_596	CATACTCCTCAATTGCCATGC	327
597	TG(24)	Panulirus_argus_Forward_Primer_597	TCACCCAAGTGCTACCATACG	Panulirus_argus_Reverse_Primer_597	ATCCTGACGTGAGAGAAGCG	328
598	AT(44)	Panulirus_argus_Forward_Primer_598	AATGTCAAATAGGGCAGTGGG	Panulirus_argus_Reverse_Primer_598	TTTTGTCAAAGAGTAACGCATAACC	329
599	TG(22)	Panulirus_argus_Forward_Primer_599	GGGGATAGGAACATTCAGGC	Panulirus_argus_Reverse_Primer_599	ACCGGCAGTCATTTCATGC	330
600	AG(12)	Panulirus_argus_Forward_Primer_600	CGAGGTCTGCGGTGTTCC	Panulirus_argus_Reverse_Primer_600	ATTTCGGGTAAGGATGTGGG	331
601	TG(26)	Panulirus_argus_Forward_Primer_601	TGTATTTGTACGCCGGAGGG	Panulirus_argus_Reverse_Primer_601	GACCCTGTGGGAGACAGACG	332
602	AG(46)	Panulirus_argus_Forward_Primer_602	GGAAGGGTTCCCTTGTTTCC	Panulirus_argus_Reverse_Primer_602	TATTTCCCAGGGGAACAGCC	333
603	AG(30)	Panulirus_argus_Forward_Primer_603	CCTTTGTTGACGTGGACGG	Panulirus_argus_Reverse_Primer_603	GAGGTGTAGGACAAGCGTGC	334
604	AT(12)	Panulirus_argus_Forward_Primer_604	AAGATGGTCTGACCTGTAAGCG	Panulirus_argus_Reverse_Primer_604	TATCAGTTCTTCCGCTGGGG	335
605	AG(14)	Panulirus_argus_Forward_Primer_605	ACAGACGCTCTTCGTCATGC	Panulirus_argus_Reverse_Primer_605	GATTGCCTGTCTCTCCTGCC	336
606	AG(16)	Panulirus_argus_Forward_Primer_606	TCGAGTACAAAACTGGTGGGG	Panulirus_argus_Reverse_Primer_606	GGTACTCCAGATTCCAGGTCG	337
607	TC(72)	Panulirus_argus_Forward_Primer_607	GCACGGAGGAAGATAGACGG	Panulirus_argus_Reverse_Primer_607	CGATGTTTTCCCTGCTTTCC	338
608	AG(16)	Panulirus_argus_Forward_Primer_608	CCCTAGGGCTCGGACAGC	Panulirus_argus_Reverse_Primer_608	GTCGTCATCATCGGGAAGG	339
609	TG(18)	Panulirus_argus_Forward_Primer_609	AATGGGTGTCTCGTGTCGC	Panulirus_argus_Reverse_Primer_609	TGCATGTCAAAGACACTGGC	340
610	TG(16)	Panulirus_argus_Forward_Primer_610	AAGGACAACCATCCTGAGGC	Panulirus_argus_Reverse_Primer_610	TTCCTCAATGGACGATGACG	341
611	AG(52)	Panulirus_argus_Forward_Primer_611	ATGACGACCAGAGGTGGCG	Panulirus_argus_Reverse_Primer_611	CGCTAAAAGCAACGACCTGC	342
612	AT(12)	Panulirus_argus_Forward_Primer_612	CGAATGTAATCATACTTCTGCCC	Panulirus_argus_Reverse_Primer_612	AATGCACAGAGGCGTACTGG	343
613	AG(12)	Panulirus_argus_Forward_Primer_613	GAAGTTGATACAAAGGAACGCC	Panulirus_argus_Reverse_Primer_613	ATGTCTTCGGGACGTTTGC	344
614	AG(18)	Panulirus_argus_Forward_Primer_614	TCGCACCACAGATTCATTCC	Panulirus_argus_Reverse_Primer_614	GTGTGGTGAGAGGGGTTGG	345
615	TC(38)	Panulirus_argus_Forward_Primer_615	ACCATTACTCACGCGACTGC	Panulirus_argus_Reverse_Primer_615	TCGTTACACTGTTCACGAGCC	346
616	TG(16)	Panulirus_argus_Forward_Primer_616	TGTGTTGCACCGTCTCAGC	Panulirus_argus_Reverse_Primer_616	ACACATACACATACGCCCGC	347
617	TC(16)	Panulirus_argus_Forward_Primer_617	CCCCATGACTTTGTCTCACG	Panulirus_argus_Reverse_Primer_617	TTATTTTCCGGTCGCACTCC	348
618	TG(14)	Panulirus_argus_Forward_Primer_618	TCGGAAAGCTGCGACTAAGG	Panulirus_argus_Reverse_Primer_618	CAAACACTGGAGCACGTTCG	349
619	AG(22)	Panulirus_argus_Forward_Primer_619	GTGGCTCACCAGACTAGGGG	Panulirus_argus_Reverse_Primer_619	AGCGAAGTTATCACACGGGG	350
620	TG(28)	Panulirus_argus_Forward_Primer_620	TCCATTCTTTTCGTCGCTCC	Panulirus_argus_Reverse_Primer_620	AGAGCCCAAGGTACGAAAGC	351
621	TG(24)	Panulirus_argus_Forward_Primer_621	TGTTACGGTCCTTGAGCACG	Panulirus_argus_Reverse_Primer_621	TTTGACCACGACGGTACAGG	352
622	TG(36)	Panulirus_argus_Forward_Primer_622	ATAGCGAGGTTTGCAATGGG	Panulirus_argus_Reverse_Primer_622	GCCACACCTAAAACGTACCG	353
623	AG(16)	Panulirus_argus_Forward_Primer_623	TGTTGATCAGTGGGGTCTGG	Panulirus_argus_Reverse_Primer_623	AATTCGACGTGTGATCTGGC	354
624	AG(56)	Panulirus_argus_Forward_Primer_624	TTCTGGGTAACGGAACCACC	Panulirus_argus_Reverse_Primer_624	CGGTATCATTTGACGGCAGC	355
625	TG(18)	Panulirus_argus_Forward_Primer_625	CCCTGATGTCAATCTCTGCG	Panulirus_argus_Reverse_Primer_625	GCCAACTACAGCAACCAGCC	356
626	AG(50)	Panulirus_argus_Forward_Primer_626	CATTCGCCTCCTCACTTGC	Panulirus_argus_Reverse_Primer_626	GGAAATTCTGAGGGACTCCTCC	357
627	TC(18)	Panulirus_argus_Forward_Primer_627	GAATTATGTCTTGTTGTGGCAGC	Panulirus_argus_Reverse_Primer_627	CAGATCACAGTTCCAGAGGGG	358
628	TG(12)	Panulirus_argus_Forward_Primer_628	GTGGCTCCTTACCCAACTCG	Panulirus_argus_Reverse_Primer_628	CAGTTAACACCAACGCGTCC	359
629	AG(44)	Panulirus_argus_Forward_Primer_629	GTTGTAAAAGAGAATCGTCGATGG	Panulirus_argus_Reverse_Primer_629	AACGAAGAAAGAGAATAATCCTCAGC	360
630	TG(14)	Panulirus_argus_Forward_Primer_630	ACATCATGAAGGCCTGTGGG	Panulirus_argus_Reverse_Primer_630	TGAATGTGTTGCCTTGGAGG	361
631	TG(16)	Panulirus_argus_Forward_Primer_631	AGAATTCCCTCCATGAGCCG	Panulirus_argus_Reverse_Primer_631	GTGTGACCCCGCACTTCC	362
632	TG(22)	Panulirus_argus_Forward_Primer_632	TGCCTTCACCCTCATAATCTATACC	Panulirus_argus_Reverse_Primer_632	AAGGCTCCTGAATCCCATAGC	363
633	TG(38)	Panulirus_argus_Forward_Primer_633	GCTGAAAATCCTGACCAGCC	Panulirus_argus_Reverse_Primer_633	AATGGCACTGTATTCCCTTGG	364
634	AG(52)	Panulirus_argus_Forward_Primer_634	GGTCTTTAGGACGTCGCTGG	Panulirus_argus_Reverse_Primer_634	ACTTTGTCGGAGGGTGAAGG	365
635	TG(14)	Panulirus_argus_Forward_Primer_635	TGACGTCAGAGGGATAGGGG	Panulirus_argus_Reverse_Primer_635	AGGTCCTCCAGGAAGTCGC	366
636	TG(24)	Panulirus_argus_Forward_Primer_636	GTAACATGGCCACTCTCCCC	Panulirus_argus_Reverse_Primer_636	CCGGCGGTAATGAGTTTAGG	367
637	AT(44)	Panulirus_argus_Forward_Primer_637	TGGCTGTATGTTTTGGTATGGC	Panulirus_argus_Reverse_Primer_637	GGGACTTATACCACAGGTTACGG	368
638	TG(18)	Panulirus_argus_Forward_Primer_638	TTCCTACCATTTCAACCCGC	Panulirus_argus_Reverse_Primer_638	AGGTTGGTCCATCGTGCC	369
639	TG(18)	Panulirus_argus_Forward_Primer_639	TGGATAGTCCTCCCTCGTCC	Panulirus_argus_Reverse_Primer_639	GCTAGTCGTTCCCTTTGGAGC	370
640	TG(28)	Panulirus_argus_Forward_Primer_640	TTCCCCGATACCTTGTGACC	Panulirus_argus_Reverse_Primer_640	TTTTGACGTGTCCAGAACGG	371
641	TG(18)	Panulirus_argus_Forward_Primer_641	GACTGGATATGGCGCGTAGC	Panulirus_argus_Reverse_Primer_641	GGCCACCTATCTTTCCAGCC	372
642	TG(12)	Panulirus_argus_Forward_Primer_642	TCTCTGAATCACTCGCCTGC	Panulirus_argus_Reverse_Primer_642	GCAACCACTCACCATTAACCC	373
643	TG(30)	Panulirus_argus_Forward_Primer_643	AGGGCTAGTAACACTAACCGCC	Panulirus_argus_Reverse_Primer_643	TCGTCGCTGCCTATCTTGC	374
644	AG(42)	Panulirus_argus_Forward_Primer_644	TTGAATGAGTTTGCCGAACC	Panulirus_argus_Reverse_Primer_644	CGTAACTCAAACTACGACTCGTTCC	375
645	TG(20)	Panulirus_argus_Forward_Primer_645	AAAACAATGGGAGAACATGCC	Panulirus_argus_Reverse_Primer_645	CTCCCAGTGTCTCCCTCACC	376
646	AG(30)	Panulirus_argus_Forward_Primer_646	CACCTTTATCGGATGCTCGG	Panulirus_argus_Reverse_Primer_646	GAAATCATCTTCATTTTGCCCC	377
647	TG(22)	Panulirus_argus_Forward_Primer_647	TAAAACCCCAACGTGAGACG	Panulirus_argus_Reverse_Primer_647	CGTTTTAAGAAATGAGGAAACTTTACG	378
648	TG(60)	Panulirus_argus_Forward_Primer_648	CGCTAGCCACTATGACACGG	Panulirus_argus_Reverse_Primer_648	ACACCCCAATACTCGCATCC	379
649	AT(14)	Panulirus_argus_Forward_Primer_649	AAATGGAGATTCCCCGAACG	Panulirus_argus_Reverse_Primer_649	AGCGCGTTTTATGATTCTTGTGG	380
650	AG(12)	Panulirus_argus_Forward_Primer_650	CGTAGCCTTCAGCCTTCAGC	Panulirus_argus_Reverse_Primer_650	CCACGACAGTTCACCTTTGG	381
651	TG(22)	Panulirus_argus_Forward_Primer_651	TGGTCAAAAGGTTTTCCAGC	Panulirus_argus_Reverse_Primer_651	AGTGCAGGGATGTACTGACG	382
652	AG(18)	Panulirus_argus_Forward_Primer_652	CCTCCACCCTTCTATCGTGC	Panulirus_argus_Reverse_Primer_652	GCACATGCAGACTGCCTACC	383
653	TG(20)	Panulirus_argus_Forward_Primer_653	GTCGAAGAAGCTGCACTCGG	Panulirus_argus_Reverse_Primer_653	TGTCTCAGTTTTATTCCATTGATTTGG	384
654	AG(42)	Panulirus_argus_Forward_Primer_654	ACCTACATGAAATCATTCAGACG	Panulirus_argus_Reverse_Primer_654	TTTAAACCATCTATCCTCAGTCCC	385
655	TC(42)	Panulirus_argus_Forward_Primer_655	TCAAAGAAATTTCCAAAAGTTCAGG	Panulirus_argus_Reverse_Primer_655	GTTGGAGTGGTCACCCAGG	386
656	TG(20)	Panulirus_argus_Forward_Primer_656	TGTTTATGCATGAGTGTTTGTGC	Panulirus_argus_Reverse_Primer_656	TTCGTCGGGAGTAAATTCGG	387
657	TG(12)	Panulirus_argus_Forward_Primer_657	AGACAAGAGGTTTCAGGCGG	Panulirus_argus_Reverse_Primer_657	GGGCTACTGGCTCTCTGTCC	388
658	AG(54)	Panulirus_argus_Forward_Primer_658	CTTGCACACGTCTTTGATGG	Panulirus_argus_Reverse_Primer_658	TGGGTTTCATATGAGTGTTCGG	389
659	TG(26)	Panulirus_argus_Forward_Primer_659	TCGCCAACTATGATCCATGC	Panulirus_argus_Reverse_Primer_659	ACATCGAGGGAGCTGAGAGC	390
660	AT(12)	Panulirus_argus_Forward_Primer_660	ATACATGAGGACGAACGGGG	Panulirus_argus_Reverse_Primer_660	AAGTCAAACTTAGATACTACGTCACGG	391
661	TG(12)	Panulirus_argus_Forward_Primer_661	CCCAGTCAGAAATCCGAACC	Panulirus_argus_Reverse_Primer_661	CCCCTGAGTACCCTTCCTGC	392
662	TG(12)	Panulirus_argus_Forward_Primer_662	GGCAGTAAGGAAATGAGGCG	Panulirus_argus_Reverse_Primer_662	AATGCTCCCCTTCTTCCTCC	393
663	TG(50)	Panulirus_argus_Forward_Primer_663	TTTTACGCCTCATATACAAATGC	Panulirus_argus_Reverse_Primer_663	TGACATACTCAAGTGAGAAACTGC	394
664	TG(12)	Panulirus_argus_Forward_Primer_664	CCACCGTCTGTTTATGACACC	Panulirus_argus_Reverse_Primer_664	TGCACTCTAACTATTCAAGAGGAACG	395
665	AT(24)	Panulirus_argus_Forward_Primer_665	GGCGTTGACTTAGTGGTGGG	Panulirus_argus_Reverse_Primer_665	TCGCCTCCTCCTTTACATGC	396
666	AG(20)	Panulirus_argus_Forward_Primer_666	TGGCATATTTCTCGAGGTGC	Panulirus_argus_Reverse_Primer_666	GAATATCCCCAGGTGATGGC	397
667	TC(32)	Panulirus_argus_Forward_Primer_667	GTTCTTATACTGAGGGCAAAGGC	Panulirus_argus_Reverse_Primer_667	TGTCCTAGTGGACCGTGGG	398
668	TG(18)	Panulirus_argus_Forward_Primer_668	GCTTCCTGGGACAAATGTGG	Panulirus_argus_Reverse_Primer_668	TGAAAGAGATGGGTCCACACG	399
669	AG(16)	Panulirus_argus_Forward_Primer_669	TCGGTGAGTCAAGATGGTGC	Panulirus_argus_Reverse_Primer_669	TTAACTCGTAAGGGGCCAGC	400
670	AT(16)	Panulirus_argus_Forward_Primer_670	CCTTGTAGACTGGATCAATGAAGG	Panulirus_argus_Reverse_Primer_670	TCATTATTTGCAGATGATTCCTACG	401
671	AT(18)	Panulirus_argus_Forward_Primer_671	CCACGACATACAGTACGCTGC	Panulirus_argus_Reverse_Primer_671	GAATCGAAGAGTTCCTGAAGGG	402
672	AG(22)	Panulirus_argus_Forward_Primer_672	TGTTTCAAGCAAAGACCACG	Panulirus_argus_Reverse_Primer_672	ACGGTGATCTCAGCAAATCG	403
673	AG(14)	Panulirus_argus_Forward_Primer_673	CCCACGATGATTCCTCTTCC	Panulirus_argus_Reverse_Primer_673	TTTGTGCGAAGTCATGGAGC	404
674	AG(14)	Panulirus_argus_Forward_Primer_674	CTCTTACGTAACCCTGCGCC	Panulirus_argus_Reverse_Primer_674	CACATTGTACGGTTATGGGGC	405
675	TG(18)	Panulirus_argus_Forward_Primer_675	AGAAATCGTGGTTTACCGGC	Panulirus_argus_Reverse_Primer_675	ATCGTGATAACAGGGACGGG	406
676	TC(18)	Panulirus_argus_Forward_Primer_676	CGAGATGGAAATGAGATAAAATGG	Panulirus_argus_Reverse_Primer_676	ATACACGCTTGCTCGTCCG	407
677	TG(24)	Panulirus_argus_Forward_Primer_677	GACACTAGGTGGTTTCCGCC	Panulirus_argus_Reverse_Primer_677	CTCCAGGGTAAAGCCTCACG	408
678	TG(32)	Panulirus_argus_Forward_Primer_678	TTCATTACCGTTTTCACTCGG	Panulirus_argus_Reverse_Primer_678	TCTTTTAACTTCCTCGTTTGCC	409
679	TG(38)	Panulirus_argus_Forward_Primer_679	TGCATGTCAGCCACAATAGC	Panulirus_argus_Reverse_Primer_679	CCTCTTTGTAAGTTAGAACACAAACCC	410
680	AT(12)	Panulirus_argus_Forward_Primer_680	GTTGCTTGAACGTGGTTTGG	Panulirus_argus_Reverse_Primer_680	ATCCTTCCCTCTCCGTAGGC	411
681	TG(36)	Panulirus_argus_Forward_Primer_681	AAATACCTGCCCTTCTCCCC	Panulirus_argus_Reverse_Primer_681	TGTTCGCACGGACACTGG	412
682	AT(22)	Panulirus_argus_Forward_Primer_682	TCACTGAAAGCCCCATTTCC	Panulirus_argus_Reverse_Primer_682	TTTTCATGGCGCACAAAGG	413
683	TG(16)	Panulirus_argus_Forward_Primer_683	CTGCAGAGGAGAATCTGAAGG	Panulirus_argus_Reverse_Primer_683	CAGAACACTCTGACCAAGTTGC	414
684	AG(66)	Panulirus_argus_Forward_Primer_684	CTACTCCCATTGATGCAGCC	Panulirus_argus_Reverse_Primer_684	GGCGGGATAAGCTACAGGG	415
685	CG(14)	Panulirus_argus_Forward_Primer_685	GATTCTCCGCGTCTTTAGCG	Panulirus_argus_Reverse_Primer_685	CCTACTGCAGACCACCCTCC	416
686	AG(16)	Panulirus_argus_Forward_Primer_686	AAGGGGCATTAGAGATAGCGG	Panulirus_argus_Reverse_Primer_686	GCAAGAGCTTCACATTTGCC	417
687	TG(12)	Panulirus_argus_Forward_Primer_687	ACCTGCTGTACCACATCCCC	Panulirus_argus_Reverse_Primer_687	ACCACAAAGGCATCACATCG	418
688	AG(42)	Panulirus_argus_Forward_Primer_688	GCTTAAGCAGGGTGAGTTATGC	Panulirus_argus_Reverse_Primer_688	CTCCTCCAGTGCTCCATTCC	419
689	AG(12)	Panulirus_argus_Forward_Primer_689	CTCCATCCAATTGACGAGGG	Panulirus_argus_Reverse_Primer_689	AAATGTAGGGATAGAATAGTTAGAGGACG	420
690	TG(46)	Panulirus_argus_Forward_Primer_690	CAGGTGTTCAACCTCTCCCC	Panulirus_argus_Reverse_Primer_690	TGGATTGACATTGAGATTTGGG	421
691	TG(14)	Panulirus_argus_Forward_Primer_691	TCCTTAGTCGAGCTCCGAGG	Panulirus_argus_Reverse_Primer_691	TCCCTCATCCTTCTCTACCCC	422
692	TG(20)	Panulirus_argus_Forward_Primer_692	TGAGTTTGGATTGTGCTCGC	Panulirus_argus_Reverse_Primer_692	CAAAAGGAGCAACAGGAGGG	423
693	TG(20)	Panulirus_argus_Forward_Primer_693	CGAGGGCCAGAGATGATAGG	Panulirus_argus_Reverse_Primer_693	GTTATCCATTCAGCTGCCCC	424
694	AG(14)	Panulirus_argus_Forward_Primer_694	TTAACTTTTGTTTCCTGTGCAGC	Panulirus_argus_Reverse_Primer_694	TTAGTCTCCCCGAGAGCTGG	425
695	AG(52)	Panulirus_argus_Forward_Primer_695	ACAGTAGACGGTGTGACGGG	Panulirus_argus_Reverse_Primer_695	GAAAGGCAAAACGACATCCC	426
696	TG(14)	Panulirus_argus_Forward_Primer_696	CACTGTTTCATGTTTCATGAGAGG	Panulirus_argus_Reverse_Primer_696	AACAAGAAAGACCTAATAACAGGAACC	427
697	TG(32)	Panulirus_argus_Forward_Primer_697	GCAGTTGTAAGAATCTGCCCG	Panulirus_argus_Reverse_Primer_697	ACTAACCTGCCGGAAAACCC	428
698	AG(14)	Panulirus_argus_Forward_Primer_698	TCGCGACGTAATGAGAGAGC	Panulirus_argus_Reverse_Primer_698	AAACAGTCTTGTAAAGGTCCAGGG	429
699	AT(26)	Panulirus_argus_Forward_Primer_699	ACTCCACTTTATTATCAAATCCCG	Panulirus_argus_Reverse_Primer_699	ACCATCGAAGGAAGCAAAGG	430
700	AG(14)	Panulirus_argus_Forward_Primer_700	GGGGCAATCCTACTGACTTCG	Panulirus_argus_Reverse_Primer_700	CGACTTACGCTTGTCGACGG	431
701	TG(24)	Panulirus_argus_Forward_Primer_701	AAGGAGTTCCGTCTCCCTCC	Panulirus_argus_Reverse_Primer_701	CATTATTACGAACTGGGCCG	432
702	AT(12)	Panulirus_argus_Forward_Primer_702	ATGGCTGAAAAGCCTTGTGG	Panulirus_argus_Reverse_Primer_702	TCGGAACTAACACACTTGAGACG	433
703	AT(46)	Panulirus_argus_Forward_Primer_703	GCCAGTTCTCTTACGACGCC	Panulirus_argus_Reverse_Primer_703	CAAATACTAGATCTCGCGCACC	434
704	TG(24)	Panulirus_argus_Forward_Primer_704	GCTGTCACTCCTATGGTCGC	Panulirus_argus_Reverse_Primer_704	GCACGAGAGTGTCATGAGGG	435
705	AG(22)	Panulirus_argus_Forward_Primer_705	GTCACTCACGCAAAACTCGG	Panulirus_argus_Reverse_Primer_705	TGTTTCTGTTTGTCTGCGCC	436
706	TG(24)	Panulirus_argus_Forward_Primer_706	CTGTGTAACCCAGAGCAGGC	Panulirus_argus_Reverse_Primer_706	GGAGAACGTCCATGAGTCCC	437
707	TG(58)	Panulirus_argus_Forward_Primer_707	GGAAAAGTGAGAATGTATTCGGC	Panulirus_argus_Reverse_Primer_707	TCATCTGCGTCAAACTAGCG	438
708	TG(22)	Panulirus_argus_Forward_Primer_708	AAACAGGGACGCGTTTTAGG	Panulirus_argus_Reverse_Primer_708	TCTCCATTCACATACCCTCCC	439
709	TG(28)	Panulirus_argus_Forward_Primer_709	TCATCAGGTCATCAGTCGCC	Panulirus_argus_Reverse_Primer_709	GACTGTGATGCGTTTCAGTACG	440
710	AG(44)	Panulirus_argus_Forward_Primer_710	TTCACAACACAGTTTCTCGCC	Panulirus_argus_Reverse_Primer_710	TGTGAACATACATAACACTCATGTGG	441
711	TG(34)	Panulirus_argus_Forward_Primer_711	TATCGTGCACTGCAACTCCG	Panulirus_argus_Reverse_Primer_711	CGCCGTAAAACATATGAGCG	442
712	AG(18)	Panulirus_argus_Forward_Primer_712	GAGTAACTCACCCGTGAACGC	Panulirus_argus_Reverse_Primer_712	CCCTTGTGGGGTTATGGC	443
713	AG(20)	Panulirus_argus_Forward_Primer_713	ACCTATCAGCACCAGGACGC	Panulirus_argus_Reverse_Primer_713	CGGATGTTATGACCGAGACG	444
714	TG(16)	Panulirus_argus_Forward_Primer_714	AGTGACTGAGGTCAGCTGGG	Panulirus_argus_Reverse_Primer_714	TACTGGCCGATGTATGCTGC	445
715	TG(28)	Panulirus_argus_Forward_Primer_715	ATTTGGTTGCAATATCCGCC	Panulirus_argus_Reverse_Primer_715	CGATGAACTTGGGTACTTGGC	446
716	TG(14)	Panulirus_argus_Forward_Primer_716	AGGATTCGCCTCTGTATGGG	Panulirus_argus_Reverse_Primer_716	GTCGTCTGGTCAGCAACACG	447
717	TG(14)	Panulirus_argus_Forward_Primer_717	AACAGCAATCGTCAATACGC	Panulirus_argus_Reverse_Primer_717	ATATTGAGAGAAGAGGTATAATCAGTACG	448
718	TG(16)	Panulirus_argus_Forward_Primer_718	CCACCAACAAACACTCCAGC	Panulirus_argus_Reverse_Primer_718	AGATGGTTGTAGGACTGAATCTCC	449
719	AT(12)	Panulirus_argus_Forward_Primer_719	CCACCCTAAGGATTTGGTCG	Panulirus_argus_Reverse_Primer_719	AATTGTAATGCGACGGGAGC	450
720	AG(16)	Panulirus_argus_Forward_Primer_720	CGTTTCTAAACAGATGGGGC	Panulirus_argus_Reverse_Primer_720	TCTTTAGGGTCCCAACATTGC	451
721	TG(30)	Panulirus_argus_Forward_Primer_721	TGCACCACACTCCTATAACAAGG	Panulirus_argus_Reverse_Primer_721	TTTTACACATACCTTGGTGCCC	452
722	TG(20)	Panulirus_argus_Forward_Primer_722	GAGGTGGTGTTGGTGTCACG	Panulirus_argus_Reverse_Primer_722	CAATCCCAAGGGAACCTGG	453
723	AG(38)	Panulirus_argus_Forward_Primer_723	GAAGAAGACGGGAAGATGCC	Panulirus_argus_Reverse_Primer_723	AAGGAGTGGATTTCTGCTTCC	454
724	TC(14)	Panulirus_argus_Forward_Primer_724	ACTTTCAAGTCCCGCACCC	Panulirus_argus_Reverse_Primer_724	GCCTGTTAATCTTGAAGGTCCG	455
725	TG(18)	Panulirus_argus_Forward_Primer_725	GCTCCTCTTCCTATAAGCCCG	Panulirus_argus_Reverse_Primer_725	GCCTCGACATGACTCTCTGC	456
726	AG(52)	Panulirus_argus_Forward_Primer_726	CGTTGTCTCGTTGGTTGTGG	Panulirus_argus_Reverse_Primer_726	GGGAGACTTAACGAAGGGAGG	457
727	AT(54)	Panulirus_argus_Forward_Primer_727	CTATCGATTACTGGGCTGGC	Panulirus_argus_Reverse_Primer_727	GTAGATAAGCCTAAGATCCATCTAACC	458
728	TG(22)	Panulirus_argus_Forward_Primer_728	TCTTAGCTCAGCGCCTCGC	Panulirus_argus_Reverse_Primer_728	TCGCGGCTAAGTTAAGGACG	459
729	TG(22)	Panulirus_argus_Forward_Primer_729	GCTTATAGGACACGGACGAGC	Panulirus_argus_Reverse_Primer_729	TGGAAAATGGAGTGTGGTGG	460
730	AG(12)	Panulirus_argus_Forward_Primer_730	GGCAAATCTCCTCTGAACCC	Panulirus_argus_Reverse_Primer_730	CCATATTCATTTCTCGGCCC	461
731	AT(28)	Panulirus_argus_Forward_Primer_731	AATTTGTGGACTTAAAAGCGG	Panulirus_argus_Reverse_Primer_731	ACATGCCTTCATAGACAGCG	462
732	AG(46)	Panulirus_argus_Forward_Primer_732	GTCAACATCAACGCAAGACG	Panulirus_argus_Reverse_Primer_732	TCAAGGCCTAGTCTCAGTGTGG	463
733	TG(24)	Panulirus_argus_Forward_Primer_733	CTCTGACAACCCGGTAACGC	Panulirus_argus_Reverse_Primer_733	GTTGGCCCGTGCTAATATCC	464
734	AT(42)	Panulirus_argus_Forward_Primer_734	TGAAGAGTCGGTGATGGTCG	Panulirus_argus_Reverse_Primer_734	AAGTCTGCACAAGACGCCG	465
735	AT(22)	Panulirus_argus_Forward_Primer_735	GCATATGGTTCTGGGAAGGG	Panulirus_argus_Reverse_Primer_735	TGCTTGTCTGTTGACGTATGC	466
736	TG(12)	Panulirus_argus_Forward_Primer_736	TCATACAGTCATACAGGCTATAGAGGG	Panulirus_argus_Reverse_Primer_736	TGTAAAATGGGGTGTGTGTGG	467
737	TG(14)	Panulirus_argus_Forward_Primer_737	ACTCCCTGACAGTGGCTTCC	Panulirus_argus_Reverse_Primer_737	TCCCACCTCAGTCAACATGC	468
738	AG(12)	Panulirus_argus_Forward_Primer_738	AGGTCTTCTTGCCAGGTTGG	Panulirus_argus_Reverse_Primer_738	CGGGTCTCTGTGTAGGGAGG	469
739	AT(14)	Panulirus_argus_Forward_Primer_739	TCGTCTTACCCTGTTGTGCG	Panulirus_argus_Reverse_Primer_739	CCACACCATCTTTACACGTATGC	470
740	AG(12)	Panulirus_argus_Forward_Primer_740	TAGTTAACCGTGGAGCACCG	Panulirus_argus_Reverse_Primer_740	TTTAATGACTCTTAGCGCCCG	471
741	TG(18)	Panulirus_argus_Forward_Primer_741	ATACGCGGTAGCTTGAAACG	Panulirus_argus_Reverse_Primer_741	AAAACCTGAGGACATAACGTGG	472
742	TG(12)	Panulirus_argus_Forward_Primer_742	CCATGACTGAAAGAAACCTTTGG	Panulirus_argus_Reverse_Primer_742	CCATTAGAGCCAGTGTAATCCG	473
743	TG(18)	Panulirus_argus_Forward_Primer_743	TCTTCATTGTCTCCTTCACTCTCC	Panulirus_argus_Reverse_Primer_743	TTGGAGAGGTTACGGCTTACG	474
744	TG(50)	Panulirus_argus_Forward_Primer_744	TCGGTCTCGTCCAATCACC	Panulirus_argus_Reverse_Primer_744	CGGTTTTCAACTTTAAAGAATTGC	475
745	TG(38)	Panulirus_argus_Forward_Primer_745	CACCTCATCAGTTTTCCAGGC	Panulirus_argus_Reverse_Primer_745	ACCGCAAATGCATAGCTTCG	476
746	TG(46)	Panulirus_argus_Forward_Primer_746	GTGCCCACTCACGATAAGCC	Panulirus_argus_Reverse_Primer_746	GCCCAATGGATATATGACTCCC	477
747	TG(18)	Panulirus_argus_Forward_Primer_747	ATCATATATGTCTCAGAGGAAAAGAAGC	Panulirus_argus_Reverse_Primer_747	GGGGTGATGATACCCTTTTGC	478
748	AG(24)	Panulirus_argus_Forward_Primer_748	TGGAGTCTCATACACTGGCAGC	Panulirus_argus_Reverse_Primer_748	TCGAGTTGGTGGTCCATTCC	479
749	TG(30)	Panulirus_argus_Forward_Primer_749	GATTTAGATCGGGTCAGGCG	Panulirus_argus_Reverse_Primer_749	TGTTGGAATATCCAGCTCACC	480
750	TG(36)	Panulirus_argus_Forward_Primer_750	GAACTTTGATTTGTCCCCACG	Panulirus_argus_Reverse_Primer_750	CGACAACACACTGTCCTGACC	481
751	TG(30)	Panulirus_argus_Forward_Primer_751	AGGGAGCTAGTTGGTGCTGC	Panulirus_argus_Reverse_Primer_751	AGCACAAACACCGAAGGAGC	482
752	TG(14)	Panulirus_argus_Forward_Primer_752	GTGGAAACGGATTCAAGCG	Panulirus_argus_Reverse_Primer_752	TCAAGGTTTTAGGTATGTTTTAAAAGGG	483
753	TG(26)	Panulirus_argus_Forward_Primer_753	TTCCTTGTATGCAGAAGCAGG	Panulirus_argus_Reverse_Primer_753	CCATCTTTTGAAACCTGAGGC	484
754	AG(16)	Panulirus_argus_Forward_Primer_754	TGACATCAAAACGTGGTGGG	Panulirus_argus_Reverse_Primer_754	GGAAAGTCCAGCGGTAGTGG	485
755	AT(42)	Panulirus_argus_Forward_Primer_755	TTTAAGCTTTTGTCGGTGCG	Panulirus_argus_Reverse_Primer_755	TCGGTGCTTTAAAGATATGGGG	486
756	TG(26)	Panulirus_argus_Forward_Primer_756	ACCGTGCCACAACACAAGG	Panulirus_argus_Reverse_Primer_756	TCACTCAAGATGACGGTGGG	487
757	TG(28)	Panulirus_argus_Forward_Primer_757	CGACTGGAATTCTTGAGAACG	Panulirus_argus_Reverse_Primer_757	GCAGACGATTGAACATTGCC	488
758	AT(34)	Panulirus_argus_Forward_Primer_758	CTCTCGTGTATCGTCGAGGC	Panulirus_argus_Reverse_Primer_758	CATTGAAGTTAACATGATCTTGGC	489
759	TG(12)	Panulirus_argus_Forward_Primer_759	TCAAAGTCTTCTGAAAGATCCTGG	Panulirus_argus_Reverse_Primer_759	GCCTGGCAGAGGAAGATCC	490
760	TC(16)	Panulirus_argus_Forward_Primer_760	TTCCCTAGCGTCCCTCTTACC	Panulirus_argus_Reverse_Primer_760	CGACAAGGAAACACTCACTCTCC	491
761	AG(12)	Panulirus_argus_Forward_Primer_761	TGGGGAGGAAAAGGATTTAGG	Panulirus_argus_Reverse_Primer_761	ACAATAACCGGGATGGAAGC	492
762	TG(22)	Panulirus_argus_Forward_Primer_762	GCGAAAGTCCAAGAGATGGG	Panulirus_argus_Reverse_Primer_762	ACCCTGTGGTTGTTCGATCC	493
763	TG(20)	Panulirus_argus_Forward_Primer_763	TTTAGTTCACCGAAGCTTTCCC	Panulirus_argus_Reverse_Primer_763	TCTGGAGTCGAACTCCTCCC	494
764	TG(32)	Panulirus_argus_Forward_Primer_764	TCATTCTCTAACGATTGGACCG	Panulirus_argus_Reverse_Primer_764	GTTATCTCCGCCTGACTGCC	495
765	AG(20)	Panulirus_argus_Forward_Primer_765	TTGACTCTGAACCAGCTGCC	Panulirus_argus_Reverse_Primer_765	ACGGCACAGGTAACTGAGGG	496
766	AG(18)	Panulirus_argus_Forward_Primer_766	GGCACATTCTTTCAGGGAGC	Panulirus_argus_Reverse_Primer_766	TCAGACCAGGATGTTGTGGG	497
767	TG(12)	Panulirus_argus_Forward_Primer_767	TGAGAATTGTGTTCAGGACCG	Panulirus_argus_Reverse_Primer_767	TCGTCATCAAAGTCAACTCGC	498
768	TG(26)	Panulirus_argus_Forward_Primer_768	AAAACTTTTAAGGCTGTGGTCAGG	Panulirus_argus_Reverse_Primer_768	CCTTAGAACCCAAGGGCAGC	499
769	AT(50)	Panulirus_argus_Forward_Primer_769	ATTCGTGTTCACAATGGAGAGG	Panulirus_argus_Reverse_Primer_769	GAGGATTTCCAGCACACCG	500
770	TC(28)	Panulirus_argus_Forward_Primer_770	GGTTGGTACTTTGTCTGCAACG	Panulirus_argus_Reverse_Primer_770	GTTGTAGTGTCCCGGGATGG	501
771	TG(24)	Panulirus_argus_Forward_Primer_771	GTCATACCCCAACCATTGGC	Panulirus_argus_Reverse_Primer_771	GGAAACCTGGGGAAATCAGG	502
772	TG(12)	Panulirus_argus_Forward_Primer_772	TCATTCAATAAAGTCCAGTCATCC	Panulirus_argus_Reverse_Primer_772	TGACTGATCCCACTCTGATGC	503
773	AG(12)	Panulirus_argus_Forward_Primer_773	AAAAGGGAGGGGTGAGAAGG	Panulirus_argus_Reverse_Primer_773	GCTGTTGTTTCTCCGCTGG	504
774	AG(44)	Panulirus_argus_Forward_Primer_774	CTTACCACACAATGGCTCCG	Panulirus_argus_Reverse_Primer_774	AGCAACCACGTCTCTCCTGG	505
775	TC(30)	Panulirus_argus_Forward_Primer_775	CAGTCACCCCTCCAATCACC	Panulirus_argus_Reverse_Primer_775	ACTTCGAACGGTGAGGATGG	506
776	AG(14)	Panulirus_argus_Forward_Primer_776	AACGTACTCATGCCTTTCATGG	Panulirus_argus_Reverse_Primer_776	CTTCTTCCTGAGACTGCGGG	507
777	TC(20)	Panulirus_argus_Forward_Primer_777	TTTCTACAATTGGCTGGAGGC	Panulirus_argus_Reverse_Primer_777	GCGAGATTTCTTCATGATGTGG	508
778	AG(14)	Panulirus_argus_Forward_Primer_778	AACAGGAAAGAGTAACCAGCGG	Panulirus_argus_Reverse_Primer_778	TCGAATCATTGAAAACGGAGG	509
779	AT(18)	Panulirus_argus_Forward_Primer_779	AGATCATGAAGCCCGAGTCC	Panulirus_argus_Reverse_Primer_779	CATATATATTGAGAAAAGCTAGGCCG	510
780	AG(48)	Panulirus_argus_Forward_Primer_780	GTATGTAAAATGAAAGGTAGGTGGG	Panulirus_argus_Reverse_Primer_780	AATTTCAGTGTCTGCACCCG	511
781	AT(52)	Panulirus_argus_Forward_Primer_781	TCCATAACTGATTTTAAGTGCCC	Panulirus_argus_Reverse_Primer_781	TACTCATCCCTGGCTGTTGG	512
782	AT(70)	Panulirus_argus_Forward_Primer_782	CATAAACACCGATGTTCTTGAGC	Panulirus_argus_Reverse_Primer_782	TCCACTTTCTGGCACTAAATAGC	513
783	TG(14)	Panulirus_argus_Forward_Primer_783	GTCCAAATGGTGCCAAGAGC	Panulirus_argus_Reverse_Primer_783	CTTTTGCTGTGCAGACGACC	514
784	TG(68)	Panulirus_argus_Forward_Primer_784	GCAAGAAACTTCCCAGAAACG	Panulirus_argus_Reverse_Primer_784	TAGCTGTGGTTCCGTTGACC	515
785	AG(44)	Panulirus_argus_Forward_Primer_785	TATCATGAGGCAGAGGCAGC	Panulirus_argus_Reverse_Primer_785	TGACACTGTCCCTCTCGTGG	516
786	TG(30)	Panulirus_argus_Forward_Primer_786	CACAAATGATAATCACACAAATGG	Panulirus_argus_Reverse_Primer_786	GCAACGAGAGATGAGGAAGG	517
787	AG(12)	Panulirus_argus_Forward_Primer_787	CCTCGGAAATGATGACCTGG	Panulirus_argus_Reverse_Primer_787	AATTACCGTCCACTCCACCG	518
788	AG(46)	Panulirus_argus_Forward_Primer_788	ACTGGAAGGCATTCTGGTGC	Panulirus_argus_Reverse_Primer_788	AACGGACAGACAAGATGGGG	519
789	TG(18)	Panulirus_argus_Forward_Primer_789	TTCACCACGTAAAGCAACGC	Panulirus_argus_Reverse_Primer_789	GGATTCATCTCTAAGGCTGTTGG	520
790	TG(28)	Panulirus_argus_Forward_Primer_790	TTGAGGAAGATCGACCAACG	Panulirus_argus_Reverse_Primer_790	TCCCTCCGTCTTTTACGTGC	521
791	TC(16)	Panulirus_argus_Forward_Primer_791	CGTGACCATTTCTTTTGGAAGG	Panulirus_argus_Reverse_Primer_791	TTTCCTTGTACGGAGGAGCC	522
792	TG(22)	Panulirus_argus_Forward_Primer_792	GCTCAACCTCGTCCTGTCG	Panulirus_argus_Reverse_Primer_792	CACTTACCCAATGGTTCTGGC	523
793	TG(20)	Panulirus_argus_Forward_Primer_793	CCCAACTGACCCTAACCACG	Panulirus_argus_Reverse_Primer_793	AATTTGGTTTGCCCAGATCG	524
794	AG(12)	Panulirus_argus_Forward_Primer_794	AATGACGGAAACAAAACCCG	Panulirus_argus_Reverse_Primer_794	TTGAGGTACTTTCTCGCTCCC	525
795	TG(20)	Panulirus_argus_Forward_Primer_795	AGTGTAGGATGGTTGTGAATCAGC	Panulirus_argus_Reverse_Primer_795	TGGTACCGTTCCAAATAGGG	526
796	AG(18)	Panulirus_argus_Forward_Primer_796	TACACGCCTGCAAAAGATGG	Panulirus_argus_Reverse_Primer_796	CGTCAACAGGTCTTGATATTTCTGC	527
797	AG(40)	Panulirus_argus_Forward_Primer_797	CTCTCACACACACTGGCTGC	Panulirus_argus_Reverse_Primer_797	CAACATCCTCCTGAAGAGCG	528
798	TC(16)	Panulirus_argus_Forward_Primer_798	GTCAGTGTGTGAAGGCCAGG	Panulirus_argus_Reverse_Primer_798	TGAGGAGGAGACGAGCTTCC	529
799	TG(36)	Panulirus_argus_Forward_Primer_799	TAACCTTGTTATCCCCAGCG	Panulirus_argus_Reverse_Primer_799	AACGAAGAGCAAATGACCCC	530
800	TG(16)	Panulirus_argus_Forward_Primer_800	AAGTTTGATGGATGAGCCCC	Panulirus_argus_Reverse_Primer_800	ACTGCAGCTGGATGAGTCCC	531
801	TC(18)	Panulirus_argus_Forward_Primer_801	GTGATAATCGTCCACGCTGC	Panulirus_argus_Reverse_Primer_801	CAGCCCGTTATACTCGGTCG	532
802	AT(56)	Panulirus_argus_Forward_Primer_802	GCCTGATGTTAATATTGCCTGG	Panulirus_argus_Reverse_Primer_802	CCACTCCTCTGGTGTTGGC	533
803	TG(20)	Panulirus_argus_Forward_Primer_803	TCGCCAAATTATTTCAAACGC	Panulirus_argus_Reverse_Primer_803	CATTCCAACCATCACCTCCC	534
804	TG(12)	Panulirus_argus_Forward_Primer_804	CGAACCCTTCCACCCTCC	Panulirus_argus_Reverse_Primer_804	CCAATCACCACCCAACACC	535
805	AG(14)	Panulirus_argus_Forward_Primer_805	GTGGGTTGGCAGTGGACC	Panulirus_argus_Reverse_Primer_805	CATGCATCAGTCTCCCCTCC	536
806	TG(26)	Panulirus_argus_Forward_Primer_806	CATGTGAGGGAGGGAGACG	Panulirus_argus_Reverse_Primer_806	TTTATGCGGTTGATGGAGGG	537
807	AG(12)	Panulirus_argus_Forward_Primer_807	CGCTAAAGCTTGGTGTAAGCC	Panulirus_argus_Reverse_Primer_807	ACCACAGGTAGATTTCCGGC	538
808	TC(48)	Panulirus_argus_Forward_Primer_808	ATTTAAGATGCAGGCGGTGG	Panulirus_argus_Reverse_Primer_808	CTCGTCACAACAGGGATTGG	539
809	AT(42)	Panulirus_argus_Forward_Primer_809	TGTGAGCAGAGAGCCACAGG	Panulirus_argus_Reverse_Primer_809	TGTTTCTCTTTACACTGTTCACTATTCTCC	540
810	TG(12)	Panulirus_argus_Forward_Primer_810	GGGTCTATCATCTGCCAGGG	Panulirus_argus_Reverse_Primer_810	AATGGCTCACCAAAGAACGG	541
811	TG(12)	Panulirus_argus_Forward_Primer_811	TAATGGGCCACGTTAGAGGG	Panulirus_argus_Reverse_Primer_811	TCCCTTTGCCTGTAGACACC	542
812	AG(46)	Panulirus_argus_Forward_Primer_812	ATGGAACTATCCGCTCGGC	Panulirus_argus_Reverse_Primer_812	CGTGTAGAGCTTCCCCATCC	543
813	AT(54)	Panulirus_argus_Forward_Primer_813	CTTAACATTTGTAATACGTGTGTGACC	Panulirus_argus_Reverse_Primer_813	AGACCCGAGTGGTAACGAGG	544
814	TC(44)	Panulirus_argus_Forward_Primer_814	TGATTTTGATGCATTTGCTCG	Panulirus_argus_Reverse_Primer_814	GACGGGAAACTGACCTGACC	545
815	AG(70)	Panulirus_argus_Forward_Primer_815	CTTGAGCGCAAACGATCC	Panulirus_argus_Reverse_Primer_815	TACATGAAATTCAGCATCATGG	546
816	AG(14)	Panulirus_argus_Forward_Primer_816	GGAAGGCAACATTACAATATCATGG	Panulirus_argus_Reverse_Primer_816	TTTCTTGTTTCCCTTACCTTGACC	547
817	AG(18)	Panulirus_argus_Forward_Primer_817	GTGGACCCGTCCCTATACCC	Panulirus_argus_Reverse_Primer_817	GAAGAGGGATGTTTGGGTGC	548
818	AT(16)	Panulirus_argus_Forward_Primer_818	TGAGGTCACACAAGAACGCC	Panulirus_argus_Reverse_Primer_818	ACACTTGGCGGATGACTCG	549
819	AT(12)	Panulirus_argus_Forward_Primer_819	CATCTGTGGCTCCTCTGTGC	Panulirus_argus_Reverse_Primer_819	AATGGAATTCCCAAGCCTCC	550
820	AG(12)	Panulirus_argus_Forward_Primer_820	TACCTTTGGCGCTCTCTTCC	Panulirus_argus_Reverse_Primer_820	TGCACAAAACAGCACAAGGG	551
821	TG(38)	Panulirus_argus_Forward_Primer_821	CATCCTAACTTATTACCACGGCG	Panulirus_argus_Reverse_Primer_821	TTCATGATGACAGTGCAGCC	552
822	AG(30)	Panulirus_argus_Forward_Primer_822	GAACGACCCTTAAGCAACGG	Panulirus_argus_Reverse_Primer_822	TGAAATATGGTTTTGCTCGTCG	553
823	AG(44)	Panulirus_argus_Forward_Primer_823	CCTTCACCACAGGTTCCCC	Panulirus_argus_Reverse_Primer_823	CGGACTGTTCCGTCAGAGG	554
824	TG(20)	Panulirus_argus_Forward_Primer_824	CACACGGATCCACTTCCTCC	Panulirus_argus_Reverse_Primer_824	TCAGGGGCCCTAAATCTTCC	555
825	AG(12)	Panulirus_argus_Forward_Primer_825	GATTTAAGCTTATTATCTCTCATTCTTGG	Panulirus_argus_Reverse_Primer_825	AAGATGGCTGAACATACTTTGG	556
826	TG(18)	Panulirus_argus_Forward_Primer_826	GGGAGAGAGTCTATGTCGGACG	Panulirus_argus_Reverse_Primer_826	AAAGCAACTCTAAGGAACGAACG	557
827	AG(12)	Panulirus_argus_Forward_Primer_827	AAAGGGGACAGAGAGAGGGG	Panulirus_argus_Reverse_Primer_827	TGCAGAAAGGAAGGGAAAGG	558
828	AG(34)	Panulirus_argus_Forward_Primer_828	TGCATACCAGTCAATTTACGC	Panulirus_argus_Reverse_Primer_828	AAGACTTTAGTAACCACTGTTATGTTACG	559
829	AG(56)	Panulirus_argus_Forward_Primer_829	TCCGGAATTTTACTCATTTCCC	Panulirus_argus_Reverse_Primer_829	CATTATTACCCATTGTTTATATGTGGG	560
830	AG(38)	Panulirus_argus_Forward_Primer_830	GGGTTCAGTTTTCACTGGGG	Panulirus_argus_Reverse_Primer_830	ATGTAGCTTGATGTTGGCGG	561
831	TG(18)	Panulirus_argus_Forward_Primer_831	TTTGTAGGATAGGGAAGGCAGC	Panulirus_argus_Reverse_Primer_831	ATGCAGAGCCCGAGTAAACG	562
832	AG(28)	Panulirus_argus_Forward_Primer_832	CTCTTTGCCAGTACCCCAGG	Panulirus_argus_Reverse_Primer_832	GAACCTGTGTCATCAGGATAAGC	563
833	TG(34)	Panulirus_argus_Forward_Primer_833	ACTGCTTGGGAACGAAAGG	Panulirus_argus_Reverse_Primer_833	AAATAGCTTCTTTAACTATACATAAGGGG	564
834	AT(50)	Panulirus_argus_Forward_Primer_834	TTTTCAAAATCATCATACAGGAAGC	Panulirus_argus_Reverse_Primer_834	TGGCGAGTCGTTATCATTGG	565
835	AG(14)	Panulirus_argus_Forward_Primer_835	GGAGGGCGAAGGGTAAGC	Panulirus_argus_Reverse_Primer_835	TACACTGCACACTCCCTCCC	566
836	TG(12)	Panulirus_argus_Forward_Primer_836	CTCTTTCGCTCTGTAGCCGC	Panulirus_argus_Reverse_Primer_836	TGAACTCACCCTTCACGACG	567
837	TG(12)	Panulirus_argus_Forward_Primer_837	GAGGAACGCATTAAGAGGGG	Panulirus_argus_Reverse_Primer_837	ATCGGTGTAGTCCGTTTGGC	568
838	AG(18)	Panulirus_argus_Forward_Primer_838	CTCTCGTCGGACCTCTCCC	Panulirus_argus_Reverse_Primer_838	AGTAGTCCCTGATGCTGGGC	569
839	AG(36)	Panulirus_argus_Forward_Primer_839	CGGTACTGACTTCACGACCTACC	Panulirus_argus_Reverse_Primer_839	CAGGCACTGTTATCAAGACGC	570
840	TG(24)	Panulirus_argus_Forward_Primer_840	TGTTACTGATGCGTTCTCTGTCC	Panulirus_argus_Reverse_Primer_840	GAAGTCGGGGCTAAATGGC	571
841	TG(34)	Panulirus_argus_Forward_Primer_841	ATTGGTTTGTGGGTTTTGGG	Panulirus_argus_Reverse_Primer_841	TGGTAACATCTGGCCTTCCC	572
842	TG(22)	Panulirus_argus_Forward_Primer_842	TCCTCTCTAGGCCCAAGTGC	Panulirus_argus_Reverse_Primer_842	TGGAGACTCGAATGTATGAAGTGC	573
843	AT(38)	Panulirus_argus_Forward_Primer_843	TTGGTCTTTGGAAACTCCCG	Panulirus_argus_Reverse_Primer_843	CCTAATCAAGGCCCTAATCCC	574
844	TG(16)	Panulirus_argus_Forward_Primer_844	AGCTATGGCTGACTTTGCCC	Panulirus_argus_Reverse_Primer_844	GAACACGATTCCAGTCCACG	575
845	TG(22)	Panulirus_argus_Forward_Primer_845	GCAATGTCCGTGTAGACCCC	Panulirus_argus_Reverse_Primer_845	AGCTGTCAGTGGGAAGGACG	576
846	TC(14)	Panulirus_argus_Forward_Primer_846	ATCGTGGTACTCACCGGAGG	Panulirus_argus_Reverse_Primer_846	TTCCCAGAGGGTTTCGACC	577
847	AG(22)	Panulirus_argus_Forward_Primer_847	ACACACACGCACCCTGTACC	Panulirus_argus_Reverse_Primer_847	ACCTTCCCCATACAGACCCC	578
848	AG(58)	Panulirus_argus_Forward_Primer_848	TCCCTATCCAGCACTCCAGG	Panulirus_argus_Reverse_Primer_848	AGAGATTCTCAGGTTTGCTTTGC	579
849	TG(22)	Panulirus_argus_Forward_Primer_849	ACAGTAAACGCAGGGGTTGG	Panulirus_argus_Reverse_Primer_849	CAGCGCGAGTAAGATTGAGG	580
850	TG(34)	Panulirus_argus_Forward_Primer_850	ACGATGGAGAAGGATGGTGG	Panulirus_argus_Reverse_Primer_850	CATGGAGCTTATTTGCATGGC	581
851	AT(48)	Panulirus_argus_Forward_Primer_851	TGATGTCATTTTGTTTCGTCTCC	Panulirus_argus_Reverse_Primer_851	GCTTCACCGACAGTAAGACCC	582
852	TG(16)	Panulirus_argus_Forward_Primer_852	ACTCGACCCACAAGAGGTGG	Panulirus_argus_Reverse_Primer_852	AGTGACGGACTGGCTGGC	583
853	AT(16)	Panulirus_argus_Forward_Primer_853	CAGTATTGACACGGCTGAGGC	Panulirus_argus_Reverse_Primer_853	TGTTACAGCCTCCAGGAATGG	584
854	TG(14)	Panulirus_argus_Forward_Primer_854	ACGGTGGCTCTCTATACGGG	Panulirus_argus_Reverse_Primer_854	AGACCGGATGTGAACACGC	585
855	AG(12)	Panulirus_argus_Forward_Primer_855	TTCCCCATCTGAACGAAGG	Panulirus_argus_Reverse_Primer_855	CTCTTACAAGGGGAGGCTGC	586
856	TC(14)	Panulirus_argus_Forward_Primer_856	TTTCATCCTCTCTGGATTCACG	Panulirus_argus_Reverse_Primer_856	GGAAGAGGTTTGTGATGGGG	587
857	AG(58)	Panulirus_argus_Forward_Primer_857	GATAGATAGCCCTGGACGCC	Panulirus_argus_Reverse_Primer_857	GACGGGCAATAAACCAGACG	588
858	TG(14)	Panulirus_argus_Forward_Primer_858	AGGAATGTGACCATCCTGGG	Panulirus_argus_Reverse_Primer_858	GCGAAAGTTTGTGAGGAACG	589
859	TG(16)	Panulirus_argus_Forward_Primer_859	TCAGGACCTTCAGTGTTGCG	Panulirus_argus_Reverse_Primer_859	ATCATCCTCTTCGACGGTGC	590
860	TG(12)	Panulirus_argus_Forward_Primer_860	TTGCTTCTCTTCCCTGGACC	Panulirus_argus_Reverse_Primer_860	ATTATGCCCTCCGGAATAGG	591
861	AG(22)	Panulirus_argus_Forward_Primer_861	CAACTTCCAGCAGTGCAAGG	Panulirus_argus_Reverse_Primer_861	TCTGGAGAGACCAGAAGGGG	592
862	TG(18)	Panulirus_argus_Forward_Primer_862	CGCGCTTTCAATAATTCACG	Panulirus_argus_Reverse_Primer_862	AATCAGGCTTACACCCCTGC	593
863	TC(12)	Panulirus_argus_Forward_Primer_863	TGCTCAGGCATTTCAGATGG	Panulirus_argus_Reverse_Primer_863	GCAACACAGAAAAGTGATGCC	594
864	TG(16)	Panulirus_argus_Forward_Primer_864	CAATAAACTCCCACCCTCCG	Panulirus_argus_Reverse_Primer_864	GAGAGAGGAAGGACAGACCCC	595
865	TG(12)	Panulirus_argus_Forward_Primer_865	GCAGAGGATTTCTGGACGGC	Panulirus_argus_Reverse_Primer_865	ACGAGTCTCCCGGCAACG	596
866	TG(12)	Panulirus_argus_Forward_Primer_866	CTTCAAGCAAGAGACTGGCG	Panulirus_argus_Reverse_Primer_866	CATTACGTATGTGCCTGAATATCG	597
867	TG(22)	Panulirus_argus_Forward_Primer_867	GGAGGTCGTGAGGGAAACC	Panulirus_argus_Reverse_Primer_867	CTTGTGAACCATCGTCTGCC	598
868	AT(22)	Panulirus_argus_Forward_Primer_868	CAGTAAAGCGCGTGTAAGCC	Panulirus_argus_Reverse_Primer_868	TTCTCTTTACATAGTTTATCGAACTTGG	599
869	AG(66)	Panulirus_argus_Forward_Primer_869	CACTTCCGCATGTATCGACC	Panulirus_argus_Reverse_Primer_869	GGTAAAACAGCCGCAACCC	600
870	AT(12)	Panulirus_argus_Forward_Primer_870	TGTAACAAATTGAGAATCCCTCG	Panulirus_argus_Reverse_Primer_870	CAGCTGGGAGACAAACTTGC	601
871	AG(16)	Panulirus_argus_Forward_Primer_871	GAGGAGAGATGCGAAAAGCC	Panulirus_argus_Reverse_Primer_871	CATCCTCAGGGAGTTGAGGC	602
872	AT(42)	Panulirus_argus_Forward_Primer_872	TTGAATGAATATCTTATTCGGTTTGC	Panulirus_argus_Reverse_Primer_872	TTCTCAACCCTCACAGGTGC	603
873	AG(20)	Panulirus_argus_Forward_Primer_873	GGGAGCAAAGTGAGACCACC	Panulirus_argus_Reverse_Primer_873	GCCCTCTCTTACTGAGTTCTGTCC	604
874	AG(28)	Panulirus_argus_Forward_Primer_874	CCTGCAGAACTCGACTGGC	Panulirus_argus_Reverse_Primer_874	TCATGGATTTGAGAGGTCGC	605
875	TG(18)	Panulirus_argus_Forward_Primer_875	TCACCCATCGGGAAATAAGC	Panulirus_argus_Reverse_Primer_875	TTTACAACTTCTTCATTCAGTACATCCC	606
876	TG(24)	Panulirus_argus_Forward_Primer_876	CGCCAGTCTCTCTTTCAGGC	Panulirus_argus_Reverse_Primer_876	CCTCCTCCTACAGAACAAGTGGG	607
877	TG(12)	Panulirus_argus_Forward_Primer_877	CGCCAGAGAACCAAATACTGG	Panulirus_argus_Reverse_Primer_877	GAGGATTCCTGTCAAGTGCG	608
878	TG(18)	Panulirus_argus_Forward_Primer_878	ACCACTGTTGCCCTCATGC	Panulirus_argus_Reverse_Primer_878	CCTTCCTCCAGCTGACATCC	609
879	TG(22)	Panulirus_argus_Forward_Primer_879	CGACATTTTAGCTTGGCAGG	Panulirus_argus_Reverse_Primer_879	ACTGCATGACTGTTGTGGGC	610
880	AG(12)	Panulirus_argus_Forward_Primer_880	CCTGGCTGCAAATTCTTATGG	Panulirus_argus_Reverse_Primer_880	CCCGTTTACGGTCAGTGAGG	611
881	AG(12)	Panulirus_argus_Forward_Primer_881	CACAGTTTATCCCTTCGGGG	Panulirus_argus_Reverse_Primer_881	CCCTTTATCAACTCGCCTGC	612
882	TG(18)	Panulirus_argus_Forward_Primer_882	TACGCTACGCATGGACTTCG	Panulirus_argus_Reverse_Primer_882	GCACAGACTGCATCTCACTTGC	613
883	TG(32)	Panulirus_argus_Forward_Primer_883	AAGTGGAGGGAATGAGAACAGG	Panulirus_argus_Reverse_Primer_883	CACGGCGACTCCAATATACC	614
884	AT(46)	Panulirus_argus_Forward_Primer_884	AGACGAGGCACATAGAGTATGAGG	Panulirus_argus_Reverse_Primer_884	GGCTCGTCCGTCAACTTAGC	615
885	AT(42)	Panulirus_argus_Forward_Primer_885	ACCTTTTGATTGACCTCGGC	Panulirus_argus_Reverse_Primer_885	TATTCCAAATATTTCAAGCCTGG	616
886	TG(14)	Panulirus_argus_Forward_Primer_886	CACCTACTCAGCACATCCGC	Panulirus_argus_Reverse_Primer_886	GTAAAGGATTGAGTGCCGGG	617
887	AG(14)	Panulirus_argus_Forward_Primer_887	ATCCGTTTCTCAACCACTCG	Panulirus_argus_Reverse_Primer_887	GACTTGTACACTGGTGTGGGG	618
888	TC(12)	Panulirus_argus_Forward_Primer_888	GAGAGACCTTGCAAAAGGGG	Panulirus_argus_Reverse_Primer_888	CAGTTTGCTTCGAAACCGC	619
889	TG(18)	Panulirus_argus_Forward_Primer_889	TACCACGCCAGCTACAGAGC	Panulirus_argus_Reverse_Primer_889	TCAACAGCGAGTTTATCGCC	620
890	AT(18)	Panulirus_argus_Forward_Primer_890	ACTGCCATCCCTCAGAGAGC	Panulirus_argus_Reverse_Primer_890	TCCTCTGCTTGGAGAGTCAGC	621
891	TG(28)	Panulirus_argus_Forward_Primer_891	CCTGCTTTGACTACCACGGC	Panulirus_argus_Reverse_Primer_891	ACATGGGATCCTCACTTGGC	622
892	AG(16)	Panulirus_argus_Forward_Primer_892	AGGCATTTCTCCTGACTGGC	Panulirus_argus_Reverse_Primer_892	GAGCGAGTGTTTGGTGTTGG	623
893	AG(18)	Panulirus_argus_Forward_Primer_893	ATGTAACTGTTGTTGATAATGCTGC	Panulirus_argus_Reverse_Primer_893	TTCATGACAGTTTTCTGTGAACC	624
894	TG(14)	Panulirus_argus_Forward_Primer_894	TTTTATGCCAATACTAGGTTCTGAGG	Panulirus_argus_Reverse_Primer_894	GGATTACCTTTGCACAAACCC	625
895	TG(16)	Panulirus_argus_Forward_Primer_895	AACTCAACCATCACGTTGCC	Panulirus_argus_Reverse_Primer_895	TATTTCTTCTGCGCGTTTGG	626
896	TG(24)	Panulirus_argus_Forward_Primer_896	TCAATCAATTTTCACCAGAATGG	Panulirus_argus_Reverse_Primer_896	CCACAATCTGAAACGTCCCC	627
897	TG(14)	Panulirus_argus_Forward_Primer_897	TGGGTGCAGAGATTGTCTCG	Panulirus_argus_Reverse_Primer_897	CGAGGAAGAAAGACCAAGGG	628
898	TG(14)	Panulirus_argus_Forward_Primer_898	CGGGAATACGAGAATGTCGG	Panulirus_argus_Reverse_Primer_898	TCCCTCCCTACCAACACCC	629
899	AT(60)	Panulirus_argus_Forward_Primer_899	TCAGACGTCATGTGGAGTTGG	Panulirus_argus_Reverse_Primer_899	GACAGGAAGCGGATGAGAGC	630
900	TG(12)	Panulirus_argus_Forward_Primer_900	ACGTCATGCTTGCTGATTGC	Panulirus_argus_Reverse_Primer_900	TGGAATAGAGTTTGCGGCG	631
901	AG(12)	Panulirus_argus_Forward_Primer_901	TCAGGTTCCAGTGACATATTCG	Panulirus_argus_Reverse_Primer_901	ACGTCAGGTTCCAGTGACC	632
902	AG(16)	Panulirus_argus_Forward_Primer_902	CGTTTCTTTTCCTCGAAATGG	Panulirus_argus_Reverse_Primer_902	GATGATGTTCTTGGCAAAGGG	633
903	AG(24)	Panulirus_argus_Forward_Primer_903	AGAAGTGGCCATCTTGCTCG	Panulirus_argus_Reverse_Primer_903	GCAATACTACGAAACCCGCC	634
904	TG(14)	Panulirus_argus_Forward_Primer_904	AAGACTCGTCGTCCAATCCG	Panulirus_argus_Reverse_Primer_904	GTTTGGGTGAGCACCTTGC	635
905	AG(36)	Panulirus_argus_Forward_Primer_905	CCCGTAATATGTTTGTGGCG	Panulirus_argus_Reverse_Primer_905	AAAGCTAAAAGCAGTCGTCCG	636
906	AG(48)	Panulirus_argus_Forward_Primer_906	TGAATAGGTCCTCGAAAGATGC	Panulirus_argus_Reverse_Primer_906	TCCTGACGGTAGATTTCCGC	637
907	AT(14)	Panulirus_argus_Forward_Primer_907	GTACGTGCGCTTTCACATCG	Panulirus_argus_Reverse_Primer_907	TCCTGAGCAAATATCATCACTGG	638
908	TG(12)	Panulirus_argus_Forward_Primer_908	TGTTGGTAGGAAAGGAAGGGG	Panulirus_argus_Reverse_Primer_908	GTCAGGCGATCAAAGTTGGG	639
909	AG(28)	Panulirus_argus_Forward_Primer_909	AGGGTTGGCATTTATTTACACG	Panulirus_argus_Reverse_Primer_909	TGATCTAACTCATAGCAGGGATCG	640
910	AG(58)	Panulirus_argus_Forward_Primer_910	GCGAACATGATCAATGCC	Panulirus_argus_Reverse_Primer_910	AATTTTGGAGGGTAAAGAAACG	641
911	TG(26)	Panulirus_argus_Forward_Primer_911	GCCTGAACCACCTGACTGG	Panulirus_argus_Reverse_Primer_911	TGACGACCAAGCGTAACACC	642
912	TG(16)	Panulirus_argus_Forward_Primer_912	TCCAGACATAGTTCGACCTCTCC	Panulirus_argus_Reverse_Primer_912	CGCATGAAAGACTGGATTGG	643
913	TC(14)	Panulirus_argus_Forward_Primer_913	CTTTGGCAGCATCAATTTGC	Panulirus_argus_Reverse_Primer_913	TTTTAAACGGGAACCGAACG	644
914	TG(24)	Panulirus_argus_Forward_Primer_914	GTACCAGGCAGGGTGAGAGG	Panulirus_argus_Reverse_Primer_914	ACCTTCAGGTCACGTCAGGC	645
915	AG(62)	Panulirus_argus_Forward_Primer_915	CTTTACCCTGAGAGCCGGG	Panulirus_argus_Reverse_Primer_915	GTGGCGATGGTATGGAAGC	646
916	TG(14)	Panulirus_argus_Forward_Primer_916	AATCCCCAGTCCATGTCTCC	Panulirus_argus_Reverse_Primer_916	TCGATCAGTTTTGAGTGTATGGC	647
917	AG(50)	Panulirus_argus_Forward_Primer_917	AGTTTGCTGCAATGCTCGG	Panulirus_argus_Reverse_Primer_917	TCTGAATTTTGTTACCTGTAAACTTGC	648
918	AG(22)	Panulirus_argus_Forward_Primer_918	AAACAGCTTCGTGCCTCTCC	Panulirus_argus_Reverse_Primer_918	GCTTAAGAGCGAGACCGTCG	649
919	AG(12)	Panulirus_argus_Forward_Primer_919	GATTGCAGCACAGATCCACC	Panulirus_argus_Reverse_Primer_919	CGTTATCATGACGGGAAGGG	650
920	TG(24)	Panulirus_argus_Forward_Primer_920	GAGTTGAGTTGCAGAGAGAGGC	Panulirus_argus_Reverse_Primer_920	TGCATCGTTGTGTAGAAAGCC	651
921	TG(12)	Panulirus_argus_Forward_Primer_921	GCTTTGGAACGTTTTCGAGG	Panulirus_argus_Reverse_Primer_921	TGGTCTTTTCTGTCGGACTGG	652
922	TG(24)	Panulirus_argus_Forward_Primer_922	GTCGAATAACGGATCCTGGC	Panulirus_argus_Reverse_Primer_922	TCTGCGTTTGTCTAATGTTATATCCC	653
923	TG(20)	Panulirus_argus_Forward_Primer_923	AACGGGGTGTCATTGAAAGG	Panulirus_argus_Reverse_Primer_923	CAGATGAATGTGCCAGTTTGG	654
924	TG(16)	Panulirus_argus_Forward_Primer_924	TACGACCTATGGCGATCACG	Panulirus_argus_Reverse_Primer_924	GTTGGAGACACTGACGCAGG	655
925	AT(20)	Panulirus_argus_Forward_Primer_925	CACGAGTTTGGATCCATTGC	Panulirus_argus_Reverse_Primer_925	TTTCAAAGGGGAATAGATGGG	656
926	AG(12)	Panulirus_argus_Forward_Primer_926	GAAGGTTCTGAGGCTTACCCC	Panulirus_argus_Reverse_Primer_926	TGCAGCTACCAGGATTTTCG	657
927	AT(12)	Panulirus_argus_Forward_Primer_927	ATAACGCAAGGAAACACACG	Panulirus_argus_Reverse_Primer_927	GTGTCGAGAATGTCTGGAGG	658
928	AT(14)	Panulirus_argus_Forward_Primer_928	TCTGTATTCTACATGGTTGTTACTGAGC	Panulirus_argus_Reverse_Primer_928	CGGCTTCTGAATTTTCGTCC	659
929	TG(24)	Panulirus_argus_Forward_Primer_929	CCCGTGTCAGGAACAAGTGG	Panulirus_argus_Reverse_Primer_929	TACACAGCGGAACACTTGGC	660
930	AG(12)	Panulirus_argus_Forward_Primer_930	CCAAGGACAAACTTCCCTCG	Panulirus_argus_Reverse_Primer_930	TAGGGAACACAAATGAGCCG	661
931	AT(46)	Panulirus_argus_Forward_Primer_931	TGTTGTGCAGCATTCACTCG	Panulirus_argus_Reverse_Primer_931	GGGGTGTTGGAGGGTTAAGG	662
932	TG(60)	Panulirus_argus_Forward_Primer_932	GTTTATCACTGTTGGGGCGG	Panulirus_argus_Reverse_Primer_932	GCCATCTCCTTCCTACGGC	663
933	TG(22)	Panulirus_argus_Forward_Primer_933	CACCATCACCTACTGTCGCC	Panulirus_argus_Reverse_Primer_933	TCATAGTAAGGAAATGAGTGAAAGAAGC	664
934	AG(32)	Panulirus_argus_Forward_Primer_934	TGGGACCTTATCTCAACCCG	Panulirus_argus_Reverse_Primer_934	GCTACGCTGTGGTAGAGGGC	665
935	TG(16)	Panulirus_argus_Forward_Primer_935	CAGACATATGCATTTCAGCAGC	Panulirus_argus_Reverse_Primer_935	CTCACACCCACCACATCTCC	666
936	TG(16)	Panulirus_argus_Forward_Primer_936	CTGGGTTCTGACCTGCTTCC	Panulirus_argus_Reverse_Primer_936	GGCCAAAAGCAACAAAATAAGG	667
937	TG(12)	Panulirus_argus_Forward_Primer_937	TTTGAATCCCTTGACCCTCC	Panulirus_argus_Reverse_Primer_937	TAGGATGGGCCTCATTCACC	668
938	TG(12)	Panulirus_argus_Forward_Primer_938	AATCTATCATATTCATGCGATAACAGG	Panulirus_argus_Reverse_Primer_938	AACGCTGCCACATTTGACC	669
939	TC(72)	Panulirus_argus_Forward_Primer_939	TGCTAAGTGTCTGGGAATCAGC	Panulirus_argus_Reverse_Primer_939	TGCAAGGAACCAATACGAGG	670
940	TG(12)	Panulirus_argus_Forward_Primer_940	GCACTTTTAAATGACCTTAAGTCGG	Panulirus_argus_Reverse_Primer_940	GAGTATGGCTCAGGGCGG	671
941	TG(16)	Panulirus_argus_Forward_Primer_941	ACTGTGTCCGTGAGACTGGC	Panulirus_argus_Reverse_Primer_941	AGGGAGGCAGGTATAAGCAGG	672
942	TG(18)	Panulirus_argus_Forward_Primer_942	GCTTTGCTTGTTCTTGACGC	Panulirus_argus_Reverse_Primer_942	AAGTTCAGTGACACGCTGGC	673
943	TG(12)	Panulirus_argus_Forward_Primer_943	ATGTGTCGTCAGCGTTCTGG	Panulirus_argus_Reverse_Primer_943	AGTGAGTTCTCTCAGGGCGG	674
944	AT(14)	Panulirus_argus_Forward_Primer_944	CTCGGGACCACTTTTATGGG	Panulirus_argus_Reverse_Primer_944	TTCGTGTTATCAGAGAAGGAGGC	675
945	AG(14)	Panulirus_argus_Forward_Primer_945	CACATGGGAGATTCATGGTCC	Panulirus_argus_Reverse_Primer_945	AAACACCGTAAGCTGCTCCC	676
946	TG(12)	Panulirus_argus_Forward_Primer_946	CCTTCAGCAAACACGAGACG	Panulirus_argus_Reverse_Primer_946	GCAAACATCAGTATGAAATCGGG	677
947	AG(16)	Panulirus_argus_Forward_Primer_947	GGTCTGTGAAGGCAAAGCTCC	Panulirus_argus_Reverse_Primer_947	GGGGCTTTATCGTGATAAGATACG	678
948	TG(20)	Panulirus_argus_Forward_Primer_948	TGAGCACTTGTTTATTTGGTACG	Panulirus_argus_Reverse_Primer_948	TGTCATTACTAACTGTATTTTAAGGGG	679
949	TG(12)	Panulirus_argus_Forward_Primer_949	ACGACAAGTGCTGACATGGG	Panulirus_argus_Reverse_Primer_949	CTGGTTATCGCGTCACCCC	680
950	TG(20)	Panulirus_argus_Forward_Primer_950	CCAATCCTGGTGTTCTTGGC	Panulirus_argus_Reverse_Primer_950	GCAGTTAGACGGATGAAACACC	681
951	TC(48)	Panulirus_argus_Forward_Primer_951	GCCGTCAAGAGAGCTGATCG	Panulirus_argus_Reverse_Primer_951	ATTAGGCAAGGCACCCAGG	682
952	TG(24)	Panulirus_argus_Forward_Primer_952	GCAACTCCCATCCTGTTTCG	Panulirus_argus_Reverse_Primer_952	CTAAAACAGTGAACGTGAATTAAGGG	683
953	AG(36)	Panulirus_argus_Forward_Primer_953	CTGATGACGATATGAAACAGAAGC	Panulirus_argus_Reverse_Primer_953	CAGGCACTACCCCTGAAACC	684
954	AT(12)	Panulirus_argus_Forward_Primer_954	TGAGATGCTGTTTTGCTCGC	Panulirus_argus_Reverse_Primer_954	ATGTGTTCTTGAACGCCACC	685
955	TG(30)	Panulirus_argus_Forward_Primer_955	AACCACCACATGTACACCGC	Panulirus_argus_Reverse_Primer_955	ATACGTCCAGCAGACGTTGG	686
956	TC(24)	Panulirus_argus_Forward_Primer_956	TACATTGAATTTCGCTCGGC	Panulirus_argus_Reverse_Primer_956	CCTAAGCTTTCTTCATATTCATCGC	687
957	TG(34)	Panulirus_argus_Forward_Primer_957	CAGCCATGTTTGTTTATGTCCG	Panulirus_argus_Reverse_Primer_957	AACTTTATGGTACATTTCACTCCACC	688
958	TG(28)	Panulirus_argus_Forward_Primer_958	GGTTCGAGAGATGAGGACCC	Panulirus_argus_Reverse_Primer_958	CACCGTTCTGATGATCTGGC	689
959	AG(12)	Panulirus_argus_Forward_Primer_959	CCCCATTCACTGGAGTCAGG	Panulirus_argus_Reverse_Primer_959	GTGCACAGTGTGTGTCCTGG	690
960	TG(24)	Panulirus_argus_Forward_Primer_960	TGTCGGAATTTTACGTTGCG	Panulirus_argus_Reverse_Primer_960	TTTCAAGTCTGGCTTTCATACTGG	691
961	TG(28)	Panulirus_argus_Forward_Primer_961	TCCGAATATTTTGTCTAATGTAATCC	Panulirus_argus_Reverse_Primer_961	ACAAGTGAACTCTCTCCCCG	692
962	TC(22)	Panulirus_argus_Forward_Primer_962	CTATCAAACAGCGACGCAGG	Panulirus_argus_Reverse_Primer_962	CGATGAATAAGGTTCAGTGAGTGG	693
963	AG(16)	Panulirus_argus_Forward_Primer_963	CGCCTATTTTCAGAGGTGCC	Panulirus_argus_Reverse_Primer_963	TTGTACGCGAACTGAGAGGG	694
964	TG(30)	Panulirus_argus_Forward_Primer_964	TCTTACCCTCCCGTGACACC	Panulirus_argus_Reverse_Primer_964	CAGGCAGCACCGTAAATAGG	695
965	AT(40)	Panulirus_argus_Forward_Primer_965	CCTGGTCAAGGTTAAGCACCC	Panulirus_argus_Reverse_Primer_965	TGGTCAACGTGCTGTTAATGG	696
966	AT(52)	Panulirus_argus_Forward_Primer_966	TGCTTTTGTTTCTTATTTTAACCACG	Panulirus_argus_Reverse_Primer_966	CTTACCTTCAGCGGACGACG	697
967	AG(12)	Panulirus_argus_Forward_Primer_967	TGAACAATTCGTATACCGGACC	Panulirus_argus_Reverse_Primer_967	GTTCAAGGCGTTATGCATCG	698
968	TG(30)	Panulirus_argus_Forward_Primer_968	TCACGCCCACTTTACACACG	Panulirus_argus_Reverse_Primer_968	TTAGGTATGGTGGCCTTGCC	699
969	AG(34)	Panulirus_argus_Forward_Primer_969	AGTGCCCACACAGTCAGTCC	Panulirus_argus_Reverse_Primer_969	TGATCGGGAGGAATTAACCC	700
970	TG(34)	Panulirus_argus_Forward_Primer_970	TTGCCTTTCATTTTCCCACC	Panulirus_argus_Reverse_Primer_970	TTCCTTTTGATTATGCTGCCC	701
971	TG(42)	Panulirus_argus_Forward_Primer_971	CCTACCTATGACGGCTACAGTGG	Panulirus_argus_Reverse_Primer_971	AGTTCGGGGTTATGGTTCCC	702
972	AG(36)	Panulirus_argus_Forward_Primer_972	GGATTTCACCCTCACCTTTCC	Panulirus_argus_Reverse_Primer_972	ATCAAGGTCGCACCTGAACC	703
973	AG(48)	Panulirus_argus_Forward_Primer_973	TTTTCCAGTAAGCAACCCCG	Panulirus_argus_Reverse_Primer_973	ACCACCGCTAAACCACTTCC	704
974	TG(14)	Panulirus_argus_Forward_Primer_974	TGATCACACATGCACACACG	Panulirus_argus_Reverse_Primer_974	CATGACATAACAGTTTGAACATGC	705
975	AG(60)	Panulirus_argus_Forward_Primer_975	TCACGTATCCTTTCCCCTCG	Panulirus_argus_Reverse_Primer_975	TCCCAGGCGATATGTATTAGGG	706
976	TG(20)	Panulirus_argus_Forward_Primer_976	GTAGTGACCTTTGACCCGGC	Panulirus_argus_Reverse_Primer_976	TGGATGACGTGATGAGGAGG	707
977	TG(12)	Panulirus_argus_Forward_Primer_977	CCAAGCTGTCCACTCACTGC	Panulirus_argus_Reverse_Primer_977	CCACTATGATTGGTTGAAAGCC	708
978	AG(18)	Panulirus_argus_Forward_Primer_978	GGAGGATGAGGGTTGTGTGG	Panulirus_argus_Reverse_Primer_978	GGTCGGCTCTACGAGAAACC	709
979	TC(12)	Panulirus_argus_Forward_Primer_979	TACCCCTCCATCATCTTCGC	Panulirus_argus_Reverse_Primer_979	TGGAGGTCATGTTGTGTGGG	710
980	AG(22)	Panulirus_argus_Forward_Primer_980	TCTCACCATTCCCACACAGG	Panulirus_argus_Reverse_Primer_980	CATCGCCTTTTGATGTCAGG	711
981	AG(60)	Panulirus_argus_Forward_Primer_981	GGAAAGGCTGATTACCACGG	Panulirus_argus_Reverse_Primer_981	GTGCCATATCGGCTATTCCG	712
982	AG(30)	Panulirus_argus_Forward_Primer_982	TCTCTTGCTTACACGTGCCC	Panulirus_argus_Reverse_Primer_982	TTGTCACAGGAGCTATGGAGC	713
983	AG(12)	Panulirus_argus_Forward_Primer_983	CTGTGTCATCATTCCCTCCG	Panulirus_argus_Reverse_Primer_983	CGGATGAGATAGGCCAGACC	714
984	AG(16)	Panulirus_argus_Forward_Primer_984	CCTACTGGCATCTGTCTGCG	Panulirus_argus_Reverse_Primer_984	AGAGCATTCCATCCGGTACG	715
985	TG(24)	Panulirus_argus_Forward_Primer_985	CAACTCACAAAATGAGGTGGC	Panulirus_argus_Reverse_Primer_985	TTGACTAGAACGGAGTCTCCCC	716
986	TG(12)	Panulirus_argus_Forward_Primer_986	TTTGATGTCCGTTGCTTTCG	Panulirus_argus_Reverse_Primer_986	GCTGTATCTTGGTACGAAACTTGG	717
987	AG(18)	Panulirus_argus_Forward_Primer_987	TGCAAAACTACGTCGTAAGTACTCG	Panulirus_argus_Reverse_Primer_987	TTGGAAAATTGCCACACAGC	718
988	AG(48)	Panulirus_argus_Forward_Primer_988	CCTCCCATTGCCTCTCAGG	Panulirus_argus_Reverse_Primer_988	GGTAGGTGGGAGAGGAGCG	719
989	TC(64)	Panulirus_argus_Forward_Primer_989	TTCGTCTTCTTCTGGGTGGG	Panulirus_argus_Reverse_Primer_989	TTGAGACACCCTTGACACAGC	720
990	TG(44)	Panulirus_argus_Forward_Primer_990	TCTGTACCAAAAGTGAAGACATGG	Panulirus_argus_Reverse_Primer_990	TCAGCAGTACACAGGAGGGC	721
991	AG(26)	Panulirus_argus_Forward_Primer_991	TTTTCAAAGAGGCAACCGC	Panulirus_argus_Reverse_Primer_991	TTATTGTGCCAAGGACACGG	722
992	TG(22)	Panulirus_argus_Forward_Primer_992	CAAAGGAGTCTGGCTTTCCC	Panulirus_argus_Reverse_Primer_992	GGGGTAGACAAGAATATGATGAGG	723
993	TG(28)	Panulirus_argus_Forward_Primer_993	TGGTAGTTTGTGGTGCTCCG	Panulirus_argus_Reverse_Primer_993	GCTTTTGGGAGAGAGATTTAAGGC	724
994	TG(18)	Panulirus_argus_Forward_Primer_994	GTGTTCGAGGAGGACGACG	Panulirus_argus_Reverse_Primer_994	AGGGAGGCTAAGCCCTGG	725
995	TG(28)	Panulirus_argus_Forward_Primer_995	ACCTCACGCATGCACAGC	Panulirus_argus_Reverse_Primer_995	CCTCATCAGACCACAGCTTCC	726
996	TC(54)	Panulirus_argus_Forward_Primer_996	TTGCTTCTCAAGGAAGTCTCG	Panulirus_argus_Reverse_Primer_996	GACTCACACTGCCAAAAGCC	727
997	AT(26)	Panulirus_argus_Forward_Primer_997	CCCCTAGAATCTGGGCACC	Panulirus_argus_Reverse_Primer_997	TGTTCTATCTATATTCAAGATTTGTCGG	728
998	TG(36)	Panulirus_argus_Forward_Primer_998	AGCACAGGGAAATAGCGAGC	Panulirus_argus_Reverse_Primer_998	AACGGCAATATACGTTGGTCG	729
999	TG(16)	Panulirus_argus_Forward_Primer_999	TCTCGGCTAGACCAACAACG	Panulirus_argus_Reverse_Primer_999	TACGACACTCCCAACATCGC	730
1000	TG(28)	Panulirus_argus_Forward_Primer_1000	CTCTTCCTCCAGGTGTCGC	Panulirus_argus_Reverse_Primer_1000	ACAACAACCCCACTTCCTCC	731
1001	AG(80)	Panulirus_argus_Forward_Primer_1001	TGTCTCTCATGGCCTCTCCC	Panulirus_argus_Reverse_Primer_1001	TGACTGCACTGGTGTGATGG	732
1002	TG(30)	Panulirus_argus_Forward_Primer_1002	CCCCGTACGGTATAAATCGG	Panulirus_argus_Reverse_Primer_1002	TCTATCCGTCCAGTGCCTCC	733
1003	AT(12)	Panulirus_argus_Forward_Primer_1003	ACAGTTTCCCTCCTTATGCG	Panulirus_argus_Reverse_Primer_1003	GGGATTATTTGATCCCTTTTGG	734
1004	TG(24)	Panulirus_argus_Forward_Primer_1004	GCAAATGGTCAGCAGAGAGG	Panulirus_argus_Reverse_Primer_1004	CCCCAGCAATTATTCTCCCC	735
1005	AG(50)	Panulirus_argus_Forward_Primer_1005	GCTCACCATTGTCATGCACC	Panulirus_argus_Reverse_Primer_1005	GCCAAAGGTGTTATGCTCGG	736
1006	TG(12)	Panulirus_argus_Forward_Primer_1006	GAGATTCTGCCGATCTGACG	Panulirus_argus_Reverse_Primer_1006	AAGTGGAATACTGCGCTGGG	737
1007	AG(12)	Panulirus_argus_Forward_Primer_1007	TCAAGGTTCAAGGTCCTCCC	Panulirus_argus_Reverse_Primer_1007	CTAGAGCTCTTCGGGAACGC	738
1008	TG(14)	Panulirus_argus_Forward_Primer_1008	TCACACACTTGGGACTTGACC	Panulirus_argus_Reverse_Primer_1008	TCTTGGATATGACGGGAGGC	739
1009	TG(30)	Panulirus_argus_Forward_Primer_1009	AACCTCCCAGTTTTGTAGTGTATCG	Panulirus_argus_Reverse_Primer_1009	AAAACAGTTTCCCCGTGTGG	740
1010	TG(12)	Panulirus_argus_Forward_Primer_1010	CACTACAGACACACGCAGGG	Panulirus_argus_Reverse_Primer_1010	ACCGGTATACGAGGACGGC	741
1011	TG(26)	Panulirus_argus_Forward_Primer_1011	CGTACACCACAGTCAGCACG	Panulirus_argus_Reverse_Primer_1011	AAATGGAAAAGCACTTGGGG	742
1012	AT(64)	Panulirus_argus_Forward_Primer_1012	GCTACCATGCAAAAGGTCCC	Panulirus_argus_Reverse_Primer_1012	GAATTTTAATTTCCTTGTGATGTGG	743
1013	AT(16)	Panulirus_argus_Forward_Primer_1013	CAAACCCAGGAACGAATGC	Panulirus_argus_Reverse_Primer_1013	GAACACTTCCCACGTTTCCC	744
1014	TG(28)	Panulirus_argus_Forward_Primer_1014	ACATGGTCGATGCAGACAGC	Panulirus_argus_Reverse_Primer_1014	CAGTGTCCCCTCCTCTTTCC	745
1015	AG(50)	Panulirus_argus_Forward_Primer_1015	CCACCCATCATCTGTCTCCC	Panulirus_argus_Reverse_Primer_1015	TCATTAAGGGGTTGATTAGTGGC	746
1016	AG(18)	Panulirus_argus_Forward_Primer_1016	TGGTGAGTCAGTGGGAGAGC	Panulirus_argus_Reverse_Primer_1016	GCGTAATACGAACGCCAGG	747
1017	AT(14)	Panulirus_argus_Forward_Primer_1017	CCTCCTCCAAATAGTTCCCG	Panulirus_argus_Reverse_Primer_1017	CAAGCCATCTCTGTTATCGCC	748
1018	TG(18)	Panulirus_argus_Forward_Primer_1018	ACGGCCATAACACACTTCCG	Panulirus_argus_Reverse_Primer_1018	ACGCTCACTTGAGGTGGTCC	749
1019	TG(12)	Panulirus_argus_Forward_Primer_1019	ACCTTTCCAAGGCTGAGGC	Panulirus_argus_Reverse_Primer_1019	CATGCATAAGGCTCAAGGGC	750
1020	TG(20)	Panulirus_argus_Forward_Primer_1020	GACCCGTTCCTTAACAGACCC	Panulirus_argus_Reverse_Primer_1020	CACAGCTGAAGGGCATTGG	751
1021	TG(26)	Panulirus_argus_Forward_Primer_1021	AAGAATGCTGCACCACCTCC	Panulirus_argus_Reverse_Primer_1021	AACAAATCACTCACGCAGCC	752
1022	AG(36)	Panulirus_argus_Forward_Primer_1022	GCTGCGAGAGATTGCTGC	Panulirus_argus_Reverse_Primer_1022	TGATAAGCCCAATGGTTTTGG	753
1023	TC(34)	Panulirus_argus_Forward_Primer_1023	TGGGTAGGAGACCTCTCACG	Panulirus_argus_Reverse_Primer_1023	GCTGGCCTACCTACTGGTCC	754
1024	TC(44)	Panulirus_argus_Forward_Primer_1024	ACCTCGAGATCTGGTGGAGC	Panulirus_argus_Reverse_Primer_1024	TGACCTGACCCTCAACAAGG	755
1025	AG(34)	Panulirus_argus_Forward_Primer_1025	TCCCTGCAGTACGACTGTGC	Panulirus_argus_Reverse_Primer_1025	TCTCCCACGGAAGAAGAACG	756
1026	AG(68)	Panulirus_argus_Forward_Primer_1026	ACACTCCTTCCCCTGAGTGC	Panulirus_argus_Reverse_Primer_1026	TCTGTGGTGACACCTGAGGC	757
1027	AT(50)	Panulirus_argus_Forward_Primer_1027	AGCTACTCTGCTAACGCGGG	Panulirus_argus_Reverse_Primer_1027	CAGTGGCAGATAAATGGGAGC	758
1028	AG(12)	Panulirus_argus_Forward_Primer_1028	CGACATTTTCACGAGTGCG	Panulirus_argus_Reverse_Primer_1028	GGAGTCCGGAAATGTAACGC	759
1029	TG(18)	Panulirus_argus_Forward_Primer_1029	ATCACTGGCCATCACAAACG	Panulirus_argus_Reverse_Primer_1029	GTCACAGGTCCACCTCCTCC	760
1030	TC(20)	Panulirus_argus_Forward_Primer_1030	AAAGAGAAGTGGGATTTGAGGC	Panulirus_argus_Reverse_Primer_1030	TGAACAGAGCAGAACCAATGC	761
1031	TG(34)	Panulirus_argus_Forward_Primer_1031	CTTTGTGTTCGGTGAATCGC	Panulirus_argus_Reverse_Primer_1031	GATGGGATCCGGGTTATGG	762
1032	TG(16)	Panulirus_argus_Forward_Primer_1032	TGCATAGGAAATTAGATAGAAAGATCC	Panulirus_argus_Reverse_Primer_1032	TCTCTGCCCACACTGTTTCC	763
1033	AG(38)	Panulirus_argus_Forward_Primer_1033	TTCCACCTTCCACAAAAGGG	Panulirus_argus_Reverse_Primer_1033	ACAGACACACGATCCTCCCC	764
1034	TG(20)	Panulirus_argus_Forward_Primer_1034	TCATTCGTCCCTTACCCTGG	Panulirus_argus_Reverse_Primer_1034	ATGAAGTCACAGGCCGTCG	765
1035	TG(16)	Panulirus_argus_Forward_Primer_1035	GATTATTACTCCCCATTAAGTTGCG	Panulirus_argus_Reverse_Primer_1035	GAGAAGGATGAGCACCTGGG	766
1036	TG(34)	Panulirus_argus_Forward_Primer_1036	TGGAAGCATATAGTCAGCCG	Panulirus_argus_Reverse_Primer_1036	TGTAAGGAAGATAAGCAATTAGTAGGC	767
1037	AG(26)	Panulirus_argus_Forward_Primer_1037	TACTCGAGGTGTCAGCACGC	Panulirus_argus_Reverse_Primer_1037	GGGTTGACCTTTCTCAAACAGC	768
1038	TG(14)	Panulirus_argus_Forward_Primer_1038	CAATTGAACAACACCTCGGC	Panulirus_argus_Reverse_Primer_1038	AGCACTGCATTCTGTGGTCG	769
1039	TG(18)	Panulirus_argus_Forward_Primer_1039	TTTGCCCTTCTCTTCTGTGTACC	Panulirus_argus_Reverse_Primer_1039	AGGGAGGCAGACTGCATAGG	770
1040	TC(50)	Panulirus_argus_Forward_Primer_1040	CTCCTGATGATGATGCACCC	Panulirus_argus_Reverse_Primer_1040	CATGAATCCAATCTATTCCAGGC	771
1041	TG(18)	Panulirus_argus_Forward_Primer_1041	AGCCAGAACTGTGGATGCG	Panulirus_argus_Reverse_Primer_1041	CCCCTCCTCCTCTAAATGGG	772
1042	AG(58)	Panulirus_argus_Forward_Primer_1042	ATAGGGTCGTTCATCCTGGG	Panulirus_argus_Reverse_Primer_1042	CGTCTCACAAACACATAACCTGG	773
1043	TG(18)	Panulirus_argus_Forward_Primer_1043	AGTCGAGCAGGCAGTTCTCC	Panulirus_argus_Reverse_Primer_1043	GAGTACATGTCAACTTACTAAAAGAGCG	774
1044	TG(14)	Panulirus_argus_Forward_Primer_1044	GCATAAATTAATCCCTCGGGC	Panulirus_argus_Reverse_Primer_1044	ACTCAACTTCCTGCACACGC	775
1045	TG(28)	Panulirus_argus_Forward_Primer_1045	AGGAAGAGACAGCCACTCGC	Panulirus_argus_Reverse_Primer_1045	AACCATTCTGTCCTGGACCC	776
1046	TG(28)	Panulirus_argus_Forward_Primer_1046	CACGAACACGGGAATGAGC	Panulirus_argus_Reverse_Primer_1046	TTATGTTGGCTCACTGTTGCC	777
1047	AT(24)	Panulirus_argus_Forward_Primer_1047	CTTTGGACGAGGAGAAAGCG	Panulirus_argus_Reverse_Primer_1047	GACCCTGAGAACCAAGTGCC	778
1048	AT(24)	Panulirus_argus_Forward_Primer_1048	CATGAATTACTTCCGTGTGTTCC	Panulirus_argus_Reverse_Primer_1048	ACCTTTGCGTTCCAATAGCC	779
1049	AG(22)	Panulirus_argus_Forward_Primer_1049	CAGTGCTCATCACAGCTTGG	Panulirus_argus_Reverse_Primer_1049	AAGGTCACATAAGCTGCATTCG	780
1050	TG(18)	Panulirus_argus_Forward_Primer_1050	AGGGAGGATGAACACTTCGC	Panulirus_argus_Reverse_Primer_1050	TCTGCATCTTCCCTATTCGC	781
1051	TG(28)	Panulirus_argus_Forward_Primer_1051	CATACAGTCCTGTCTCGTGGC	Panulirus_argus_Reverse_Primer_1051	AGGACGAAGCCTAGCTGTGG	782
1052	AG(12)	Panulirus_argus_Forward_Primer_1052	CATCATCAACTTTCTCTTCCCG	Panulirus_argus_Reverse_Primer_1052	CACGGCACTAAAGAATACGGC	783
1053	AG(26)	Panulirus_argus_Forward_Primer_1053	TCCTTTCCTATCGCGTCTGG	Panulirus_argus_Reverse_Primer_1053	GAGCCCCTTTGGATGAAGG	784
1054	AG(46)	Panulirus_argus_Forward_Primer_1054	TGTTTACGTTGTCCAATTTACGC	Panulirus_argus_Reverse_Primer_1054	GGTACTTCACATGACAATGACTGG	785
1055	AG(16)	Panulirus_argus_Forward_Primer_1055	ACTGCCACTCCTTCGTGAGC	Panulirus_argus_Reverse_Primer_1055	ATGTCCCTCCAGCTCTTTCG	786
1056	AT(34)	Panulirus_argus_Forward_Primer_1056	ATCGCCTAAACAGCAGTGCG	Panulirus_argus_Reverse_Primer_1056	GTTGTGTTCATATGTCCAGTTGTCC	787
1057	TG(24)	Panulirus_argus_Forward_Primer_1057	ACAAGGAACCAACCAGTCGC	Panulirus_argus_Reverse_Primer_1057	GAGGAATGGGCAGAAATTGG	788
1058	AT(74)	Panulirus_argus_Forward_Primer_1058	CAACAAATACGGACCGTTGG	Panulirus_argus_Reverse_Primer_1058	CGCTGATGTTTATCTGCATTCC	789
1059	AT(42)	Panulirus_argus_Forward_Primer_1059	TCTGCTTTGGGATAATGTGGC	Panulirus_argus_Reverse_Primer_1059	CGGTGCTAGCCTTAATGACCC	790
1060	AG(28)	Panulirus_argus_Forward_Primer_1060	AAACCCAAGCACATTTCTCG	Panulirus_argus_Reverse_Primer_1060	TGGAGGAAGAATCTGACTAAGCG	791
1061	TG(38)	Panulirus_argus_Forward_Primer_1061	TACCACTGACACACCCACCC	Panulirus_argus_Reverse_Primer_1061	CGGGTTGTGTATTGTGTCTCG	792
1062	AT(46)	Panulirus_argus_Forward_Primer_1062	CTTAACGTGGACGGGACACC	Panulirus_argus_Reverse_Primer_1062	GGTGGTTGGCTATCAAACGG	793
1063	TG(14)	Panulirus_argus_Forward_Primer_1063	CGTTAGCGTCTGAGTGTGGC	Panulirus_argus_Reverse_Primer_1063	CATCGTCTCCACCTTCATGC	794
1064	AG(14)	Panulirus_argus_Forward_Primer_1064	TCGCTAAACTGCACTCAGCC	Panulirus_argus_Reverse_Primer_1064	TGTTTTGTCCGATGGAAGGC	795
1065	TC(38)	Panulirus_argus_Forward_Primer_1065	CCTGAATCAAAGTCCTCCCC	Panulirus_argus_Reverse_Primer_1065	GCCTACCAGGTTCCAGGG	796
1066	AT(14)	Panulirus_argus_Forward_Primer_1066	TACCCGTTTGTTGTGGTTCG	Panulirus_argus_Reverse_Primer_1066	TGGAGGCGTTATCGTTACGG	797
1067	TG(12)	Panulirus_argus_Forward_Primer_1067	ACCGGAAAGCCATATCAACC	Panulirus_argus_Reverse_Primer_1067	CTGGGTTAGTTGTGGATCGG	798
1068	AG(24)	Panulirus_argus_Forward_Primer_1068	TCGAGTACCGTATGCGCC	Panulirus_argus_Reverse_Primer_1068	AAGGTGAACACAGCCCACG	799
1069	AT(42)	Panulirus_argus_Forward_Primer_1069	TGAAAATGAAAGATGCATCATAACC	Panulirus_argus_Reverse_Primer_1069	AGATCCCATTCATTTCCTGACC	800
1070	AT(76)	Panulirus_argus_Forward_Primer_1070	CATTCAGACTCAGCTTCGGG	Panulirus_argus_Reverse_Primer_1070	CCACATACGAAGACATTATGCACC	801
1071	AT(16)	Panulirus_argus_Forward_Primer_1071	ATAATGCCGGACGAAAGACC	Panulirus_argus_Reverse_Primer_1071	TCTTCACGAAATGGTCCTGG	802
1072	TC(12)	Panulirus_argus_Forward_Primer_1072	ATCTTGTCTCGTCTGGGACC	Panulirus_argus_Reverse_Primer_1072	CATGGAAGGTGGTTTACAGC	803
1073	TG(14)	Panulirus_argus_Forward_Primer_1073	CTGATGGCTTGTTGCTGAGG	Panulirus_argus_Reverse_Primer_1073	TGAGACACCCACGACAATGG	804
1074	TG(38)	Panulirus_argus_Forward_Primer_1074	TTGGATCACCACCTGAAACG	Panulirus_argus_Reverse_Primer_1074	CATGTGTGTGTGGGGAGAGG	805
1075	AT(28)	Panulirus_argus_Forward_Primer_1075	ACTGCAGGTAAGACCCCTGG	Panulirus_argus_Reverse_Primer_1075	CAACTGTCTTGTTGGCCGC	806
1076	TC(14)	Panulirus_argus_Forward_Primer_1076	TCATGGACTTTTGGATGTTGG	Panulirus_argus_Reverse_Primer_1076	TGGAAGAGGAGTGGTAACTATGG	807
1077	TG(18)	Panulirus_argus_Forward_Primer_1077	CATTTATCGTCTTGGAGGATGG	Panulirus_argus_Reverse_Primer_1077	TCCGTCACTTATGCTCTGCC	808
1078	TC(30)	Panulirus_argus_Forward_Primer_1078	CATACACTTTACCGTGTTTGCG	Panulirus_argus_Reverse_Primer_1078	CATCCTCATTCGGTCCCC	809
1079	TG(20)	Panulirus_argus_Forward_Primer_1079	CGTTTGTACTTGTGGGCACG	Panulirus_argus_Reverse_Primer_1079	CCTTGCGTCATGACCATCC	810
1080	TG(12)	Panulirus_argus_Forward_Primer_1080	TAAAACGACCCACTGATCGC	Panulirus_argus_Reverse_Primer_1080	TCTGCATCCACCTGACATCC	811
1081	AG(42)	Panulirus_argus_Forward_Primer_1081	TTCGAGTGTCTTTCCCTCCC	Panulirus_argus_Reverse_Primer_1081	ACACCTTGGTGAAGAGTGCG	812
1082	TG(32)	Panulirus_argus_Forward_Primer_1082	CCTGTATATACCGTACTAATCGTCTTTGG	Panulirus_argus_Reverse_Primer_1082	TGTTTTGGTTGGCACTGTGG	813
1083	AT(12)	Panulirus_argus_Forward_Primer_1083	TCCTTGATTCAGGTGGTGTTACC	Panulirus_argus_Reverse_Primer_1083	AAGGAGTCTTTGTGTTACCCTGG	814
1084	TG(52)	Panulirus_argus_Forward_Primer_1084	TGTTTATGAGGGTTTGTACATGG	Panulirus_argus_Reverse_Primer_1084	TGATCCATAATTGTCGAACATAGG	815
1085	AG(28)	Panulirus_argus_Forward_Primer_1085	CAGAGAAGAACACGCGTTGG	Panulirus_argus_Reverse_Primer_1085	GGAGCTTTTGCTTGAAAGGG	816
1086	TG(18)	Panulirus_argus_Forward_Primer_1086	CAGCTGCTTAGTGATAGGAACCG	Panulirus_argus_Reverse_Primer_1086	CACCAAACAATATACCCTGCTGC	817
1087	AG(12)	Panulirus_argus_Forward_Primer_1087	TGAACCTTTGACATTTGGGC	Panulirus_argus_Reverse_Primer_1087	TGTACGCACAAGCACAGACG	818
1088	AT(38)	Panulirus_argus_Forward_Primer_1088	AGGAAGCCACGGAAGTAGGG	Panulirus_argus_Reverse_Primer_1088	AAAAGACCATTCCTCGCTGC	819
1089	TC(12)	Panulirus_argus_Forward_Primer_1089	CGAGCGAACTATAATGCAGATGG	Panulirus_argus_Reverse_Primer_1089	CGGTGTATGAGTGGCCTAACC	820
1090	AG(16)	Panulirus_argus_Forward_Primer_1090	CCGTAGGGTGTTTGTCGAGC	Panulirus_argus_Reverse_Primer_1090	GCCAGAGTGGAATGAAAGGC	821
1091	AG(22)	Panulirus_argus_Forward_Primer_1091	ACGTAGGCTTCACCGAGACC	Panulirus_argus_Reverse_Primer_1091	AGCACGTGCAGTTTCTTTCG	822
1092	TG(12)	Panulirus_argus_Forward_Primer_1092	AACTGCTTGAGGTGTCCTTGC	Panulirus_argus_Reverse_Primer_1092	TAACACAAAGGTGTGCAGCG	823
1093	TG(26)	Panulirus_argus_Forward_Primer_1093	CAGTGCACCACAGACAGGC	Panulirus_argus_Reverse_Primer_1093	AAATGGGATTTATGTGCGGG	824
1094	TG(48)	Panulirus_argus_Forward_Primer_1094	TCTGCAACACAAGCATCACC	Panulirus_argus_Reverse_Primer_1094	CCTCCTACCCATCAACCAGC	825
1095	AG(12)	Panulirus_argus_Forward_Primer_1095	TAATGGGACCCTTTCCTTGG	Panulirus_argus_Reverse_Primer_1095	GTGAAGACAGCGGAGAAGCC	826
1096	AG(60)	Panulirus_argus_Forward_Primer_1096	GCGACGTAGCGAGAGACG	Panulirus_argus_Reverse_Primer_1096	GATATCCTCACGCGTTGTGC	827
1097	AG(34)	Panulirus_argus_Forward_Primer_1097	ACAGACCAGACCCACAACCC	Panulirus_argus_Reverse_Primer_1097	AGCCAAATTAATTCTTCAGATACCG	828
1098	AG(20)	Panulirus_argus_Forward_Primer_1098	CTTCCTTCTTCTGCCCCTCC	Panulirus_argus_Reverse_Primer_1098	AGAAACCTGGCTGGAACTGG	829
1099	TG(16)	Panulirus_argus_Forward_Primer_1099	ATTATTATCGTGGCCTCCCG	Panulirus_argus_Reverse_Primer_1099	TCCTGGAATGGTTTGGTTCC	830
1100	TG(24)	Panulirus_argus_Forward_Primer_1100	AGGTAGAGAGTCAAGACAGATGGG	Panulirus_argus_Reverse_Primer_1100	TTGTGTGGCTTGTAGGTCGG	831
1101	TC(12)	Panulirus_argus_Forward_Primer_1101	TGACCAGATTTCTCCTATTGACG	Panulirus_argus_Reverse_Primer_1101	GTGGAGGATCAAGGTCAGCC	832
1102	AG(16)	Panulirus_argus_Forward_Primer_1102	AACTCTCCCCACGCCTCG	Panulirus_argus_Reverse_Primer_1102	CAAAGACCTTGTGGCTGGC	833
1103	AG(34)	Panulirus_argus_Forward_Primer_1103	AATGCTCTCTCTCCGATGGC	Panulirus_argus_Reverse_Primer_1103	TGCCAATGATTCAGTCACATACC	834
1104	TG(40)	Panulirus_argus_Forward_Primer_1104	TTTTCCTGCGACTTGAATGC	Panulirus_argus_Reverse_Primer_1104	CCCTCCGAGTGTTTACTGCG	835
1105	TG(14)	Panulirus_argus_Forward_Primer_1105	GGCGTCCTGTGTTTGTAGGG	Panulirus_argus_Reverse_Primer_1105	TTAATTGTTCCCTCCCCACG	836
1106	TG(12)	Panulirus_argus_Forward_Primer_1106	TACGGCTGTTATGAAGGCCC	Panulirus_argus_Reverse_Primer_1106	TCTGGGACCACTACTTTGCG	837
1107	AG(30)	Panulirus_argus_Forward_Primer_1107	TAAGCTTGGGCATGTTTTCG	Panulirus_argus_Reverse_Primer_1107	TAGTGGCGAAGTTGTGGAGG	838
1108	AT(30)	Panulirus_argus_Forward_Primer_1108	TTCGAGCCTATCTGTTGGAGG	Panulirus_argus_Reverse_Primer_1108	ACTGTCTTGCTCCCTCTCCG	839
1109	TG(14)	Panulirus_argus_Forward_Primer_1109	CCCGTAGCACGTAAATGAAAGC	Panulirus_argus_Reverse_Primer_1109	GCCAGCTGTGGAGAACGC	840
1110	TG(12)	Panulirus_argus_Forward_Primer_1110	AGTTGTGGGTGTGTGGAGGC	Panulirus_argus_Reverse_Primer_1110	CACCCCTACACCAACATTACCC	841
1111	AT(52)	Panulirus_argus_Forward_Primer_1111	AGTAAGTTTGCCACGTTCGG	Panulirus_argus_Reverse_Primer_1111	TTGTCCCGGTGGTTACAGC	842
1112	AT(40)	Panulirus_argus_Forward_Primer_1112	TGAATCGAGAAGCCTCACCC	Panulirus_argus_Reverse_Primer_1112	TTGTCTAATTTTGTTCTACCTTTGCC	843
1113	AG(26)	Panulirus_argus_Forward_Primer_1113	CATCAACGGTATGAGGCTGG	Panulirus_argus_Reverse_Primer_1113	ATCGGGTTTGCAGTTTGTCG	844
1114	TG(24)	Panulirus_argus_Forward_Primer_1114	GTGGAGGAGGATGTTGGAGC	Panulirus_argus_Reverse_Primer_1114	CGCAATGTCCACTACATCCG	845
1115	TG(12)	Panulirus_argus_Forward_Primer_1115	CCGGGTGTAGATGTGTCAAGC	Panulirus_argus_Reverse_Primer_1115	CACCCAAGGATCGTACTGGC	846
1116	TG(12)	Panulirus_argus_Forward_Primer_1116	ACGGGAAAGACAGATCCTCG	Panulirus_argus_Reverse_Primer_1116	CAGTGTGTCAGATTCGAGCG	847
1117	TG(12)	Panulirus_argus_Forward_Primer_1117	TAAGCTTTGGTGAGTCGGGG	Panulirus_argus_Reverse_Primer_1117	ACGACCTTCCCTATTCAGCG	848
1118	TG(20)	Panulirus_argus_Forward_Primer_1118	GAATGACGGAAAATCTCGCC	Panulirus_argus_Reverse_Primer_1118	CGGGAGTTCCTACCCTCTCC	849
1119	AG(30)	Panulirus_argus_Forward_Primer_1119	TGATGTTGACATCTGTACTTCCCC	Panulirus_argus_Reverse_Primer_1119	GTCTTCCTAAGCTCCTTTACATTGG	850
1120	AT(62)	Panulirus_argus_Forward_Primer_1120	CAATGGTGTCAAAATTATGGTCG	Panulirus_argus_Reverse_Primer_1120	CCAGTCCAACCGATACACCC	851
1121	TC(22)	Panulirus_argus_Forward_Primer_1121	ATTACCAGCGTCCGTGGC	Panulirus_argus_Reverse_Primer_1121	GAATACGAGTTATGGAGCGTCG	852
1122	AG(50)	Panulirus_argus_Forward_Primer_1122	CGGATAACCCATTCTGCTCC	Panulirus_argus_Reverse_Primer_1122	CATTCCACGGTATCAGCAGG	853
1123	TG(28)	Panulirus_argus_Forward_Primer_1123	GGTGTACCTAGGTGGGTTACATGG	Panulirus_argus_Reverse_Primer_1123	GCAGGCAGGAACGAGAAGG	854
1124	TG(12)	Panulirus_argus_Forward_Primer_1124	GTCACAACAGGAGGACGGC	Panulirus_argus_Reverse_Primer_1124	TCATGTCATCCGTCGTAGCC	855
1125	TG(24)	Panulirus_argus_Forward_Primer_1125	CGCATTAATTGGAGACACAGG	Panulirus_argus_Reverse_Primer_1125	AAACTACGTGTGTGGGAAATCG	856
1126	TG(12)	Panulirus_argus_Forward_Primer_1126	GGAGGGATGGTGGGTCTAGG	Panulirus_argus_Reverse_Primer_1126	ACTTCGAGAGACGAGGACGG	857
1127	AG(34)	Panulirus_argus_Forward_Primer_1127	TGCTGTAATACACTCACAGCCG	Panulirus_argus_Reverse_Primer_1127	GAGCCGAAGCCAGTGTGG	858
1128	AG(28)	Panulirus_argus_Forward_Primer_1128	AAGTCCGGTAACGCTGGC	Panulirus_argus_Reverse_Primer_1128	CGCGTTTGGAACAATACACC	859
1129	TG(12)	Panulirus_argus_Forward_Primer_1129	AGGGACGTGTTCTCTCAGGG	Panulirus_argus_Reverse_Primer_1129	ATGGGGAACAATGAACCTGG	860
1130	TG(16)	Panulirus_argus_Forward_Primer_1130	GGGTTGAGAACATCCCTTCC	Panulirus_argus_Reverse_Primer_1130	TCCTTGATCTCCCTTGAATGC	861
1131	AT(14)	Panulirus_argus_Forward_Primer_1131	CATAGTTAAGAGACAGGGCACTACG	Panulirus_argus_Reverse_Primer_1131	ACGCAGCAACAAGAGAATGG	862
1132	AG(26)	Panulirus_argus_Forward_Primer_1132	TGGATCAACGTTTTCATTCCC	Panulirus_argus_Reverse_Primer_1132	TACAGGTGATGCCTGAAGCC	863
1133	TG(22)	Panulirus_argus_Forward_Primer_1133	TATCTAAGACGTCACGGCCC	Panulirus_argus_Reverse_Primer_1133	GATTTCTGCTAGTTATACATTCCCC	864
1134	AG(12)	Panulirus_argus_Forward_Primer_1134	TTTGGATTCTCAATTCTTCCTCG	Panulirus_argus_Reverse_Primer_1134	GTGGGCTCCGTTCTCTATGG	865
1135	AG(56)	Panulirus_argus_Forward_Primer_1135	CTCCACAACTGGTGAGAGGG	Panulirus_argus_Reverse_Primer_1135	TTTGTAGACTAGAGTATAGTAAGTGAGGGG	866
1136	AG(36)	Panulirus_argus_Forward_Primer_1136	GCCAGGAACGGACTACTTGC	Panulirus_argus_Reverse_Primer_1136	CCTGCCCTTCTCTTGTACCC	867
1137	AG(32)	Panulirus_argus_Forward_Primer_1137	ACGTGACCACAGGCTCCC	Panulirus_argus_Reverse_Primer_1137	CTCAGACCCCAAACCTGACC	868
1138	TG(12)	Panulirus_argus_Forward_Primer_1138	GCATAGTTTAATGGGAGGGGC	Panulirus_argus_Reverse_Primer_1138	ACACAGGTTCTCTCCCTCCG	869
1139	TG(28)	Panulirus_argus_Forward_Primer_1139	GCTCGTCTCTCCAAACAAAAGG	Panulirus_argus_Reverse_Primer_1139	CACTTAGCACACATGCACGC	870
1140	AT(50)	Panulirus_argus_Forward_Primer_1140	TTTCTCTCTTGCACCTCCCC	Panulirus_argus_Reverse_Primer_1140	AAGGTCTCTCTTGGCAACCG	871
1141	AG(16)	Panulirus_argus_Forward_Primer_1141	GCAGAGAGAGAACAAGGCGG	Panulirus_argus_Reverse_Primer_1141	GTTTCTGGGATGGTCTTGGC	872
1142	TC(38)	Panulirus_argus_Forward_Primer_1142	TCCTGCAGTGCATAATTCGC	Panulirus_argus_Reverse_Primer_1142	TACCGCCTGGATGGTAAACG	873
1143	TG(16)	Panulirus_argus_Forward_Primer_1143	CAGTCATCCCCTCGAACTCC	Panulirus_argus_Reverse_Primer_1143	ACAGATGCGTCACTTCCCG	874
1144	TG(12)	Panulirus_argus_Forward_Primer_1144	GCGTGTAAAGTCTCCCTCCG	Panulirus_argus_Reverse_Primer_1144	TAGCGGCTGTGTTTACCTCG	875
1145	TG(22)	Panulirus_argus_Forward_Primer_1145	CCCTAATGACTGCTGCCTGG	Panulirus_argus_Reverse_Primer_1145	CACTGACCTCCATCCTGCC	876
1146	TG(50)	Panulirus_argus_Forward_Primer_1146	AATATTATTGACCAGGGCATCG	Panulirus_argus_Reverse_Primer_1146	TGGAGGCAACTTAAACACGC	877
1147	AG(42)	Panulirus_argus_Forward_Primer_1147	TTCGGTAACTCGACCGACG	Panulirus_argus_Reverse_Primer_1147	CGGCTGTAGGGAAACAGACC	878
1148	AG(12)	Panulirus_argus_Forward_Primer_1148	ACATCAAACGGAAAGTCGGC	Panulirus_argus_Reverse_Primer_1148	GCCAACAATCAAAAGACATTCG	879
1149	TG(16)	Panulirus_argus_Forward_Primer_1149	ACACCTTCCATGCCTACTGC	Panulirus_argus_Reverse_Primer_1149	ATGCCATACGAAAGATCCCG	880
1150	AT(60)	Panulirus_argus_Forward_Primer_1150	CAAAGGTGGCTGCTGAAGG	Panulirus_argus_Reverse_Primer_1150	AATTAACATCATTGTCCCCTGG	881
1151	TG(30)	Panulirus_argus_Forward_Primer_1151	TGGCTTGTGTATCTGATCCTCC	Panulirus_argus_Reverse_Primer_1151	AATGATCCGACAAAACATCCG	882
1152	TG(32)	Panulirus_argus_Forward_Primer_1152	TATATGCGTGAATCCGTGGG	Panulirus_argus_Reverse_Primer_1152	GATAAATGTGTGCTTACTAATGCTGG	883
1153	AG(40)	Panulirus_argus_Forward_Primer_1153	TAGCTGGAAGTTTGGGTGGC	Panulirus_argus_Reverse_Primer_1153	TCGGGAACATGTCGATTAGC	884
1154	AG(20)	Panulirus_argus_Forward_Primer_1154	GCTTCTTTGACGAACTCTGGG	Panulirus_argus_Reverse_Primer_1154	CATAAAGGAAGGGGACGAGC	885
1155	TG(18)	Panulirus_argus_Forward_Primer_1155	GCATTGTAACCTCGAACTGGC	Panulirus_argus_Reverse_Primer_1155	GAGAGAAGGGGAGGCAAAGC	886
1156	TG(16)	Panulirus_argus_Forward_Primer_1156	CTCATAATTATTCTTTGTTGAGTGAGCC	Panulirus_argus_Reverse_Primer_1156	TGCTGCATCCTCATTGTTCG	887
1157	TG(14)	Panulirus_argus_Forward_Primer_1157	AAAATCACCGCCATCTCAGC	Panulirus_argus_Reverse_Primer_1157	CTGTCCTACGTAGCCACCCG	888
1158	AG(18)	Panulirus_argus_Forward_Primer_1158	CCACTCTTGTGTATCCTGGGC	Panulirus_argus_Reverse_Primer_1158	ATGGGGATGGATAGGGTGG	889
1159	AG(16)	Panulirus_argus_Forward_Primer_1159	ACCAGCATTCCGTTTTCTGC	Panulirus_argus_Reverse_Primer_1159	TCATCGTTTCTGACAATTGGG	890
1160	AT(40)	Panulirus_argus_Forward_Primer_1160	CAGTCGCTCTCCACTCTTCC	Panulirus_argus_Reverse_Primer_1160	GAGTGGATGTATGCCAATGAGG	891
1161	TG(12)	Panulirus_argus_Forward_Primer_1161	GAGAAACTCCGGAGGCTGG	Panulirus_argus_Reverse_Primer_1161	AGACTCTTTCCTTCCACAGCG	892
1162	AG(30)	Panulirus_argus_Forward_Primer_1162	GCATAGATGGAGGTAGCGGG	Panulirus_argus_Reverse_Primer_1162	TAGCTTCATCACCGTCAGCC	893
1163	TG(18)	Panulirus_argus_Forward_Primer_1163	CTCAGACCACTGCCCATACG	Panulirus_argus_Reverse_Primer_1163	GCAAGTCACACATCCGAACG	894
1164	AG(22)	Panulirus_argus_Forward_Primer_1164	CCGGCAACTCTGGTTCTACC	Panulirus_argus_Reverse_Primer_1164	CCAGTAGGGGAGCTGGACC	895
1165	AG(58)	Panulirus_argus_Forward_Primer_1165	AGGGGTAGACGTCGGAAAGC	Panulirus_argus_Reverse_Primer_1165	CCTACTTTCCCTTCTCCCCG	896
1166	AT(56)	Panulirus_argus_Forward_Primer_1166	CAGTTAGAGCGCGAGTGTGG	Panulirus_argus_Reverse_Primer_1166	AATGTCTACTGTCCACCTTGTTCC	897
1167	AT(20)	Panulirus_argus_Forward_Primer_1167	AAGCGACTGTCTCCTCCCC	Panulirus_argus_Reverse_Primer_1167	CAGGAACTCCCCTCCCTACC	898
1168	TG(54)	Panulirus_argus_Forward_Primer_1168	TAATATGCATGTGGCTGGGC	Panulirus_argus_Reverse_Primer_1168	ATAACCTTGGGAAGGCAGGC	899
1169	TC(12)	Panulirus_argus_Forward_Primer_1169	CGGCTGTATCTTTAACGGGG	Panulirus_argus_Reverse_Primer_1169	GACCTCACGAACTCAGCCG	900
1170	TG(14)	Panulirus_argus_Forward_Primer_1170	AGCCTCAGACATTATCGCGG	Panulirus_argus_Reverse_Primer_1170	GAGTGCGTCATTGCGTGC	901
1171	TG(24)	Panulirus_argus_Forward_Primer_1171	CAAATGAGACTTGTATTGCAGCC	Panulirus_argus_Reverse_Primer_1171	ACAAGAGCAACACACTGGGG	902
1172	TG(26)	Panulirus_argus_Forward_Primer_1172	GCGAAACTTTTACAAATAATCCCC	Panulirus_argus_Reverse_Primer_1172	AAACCTCATCAGTGCCTCGC	903
1173	AG(52)	Panulirus_argus_Forward_Primer_1173	TTCTGGATCTGATAATTTGGGG	Panulirus_argus_Reverse_Primer_1173	AAAACAACTTCAGGTGCTGCC	904
1174	AG(52)	Panulirus_argus_Forward_Primer_1174	GAGCGAGTCCTAAGGAAGGG	Panulirus_argus_Reverse_Primer_1174	TTTGTAGAGCACAAGCAAGGG	905
1175	AG(14)	Panulirus_argus_Forward_Primer_1175	TCCTTCCCCTCATTCCACC	Panulirus_argus_Reverse_Primer_1175	TACCTCAACGCTGGTTTCCC	906
1176	AT(40)	Panulirus_argus_Forward_Primer_1176	TTTTGTCCCATGAAATATGGC	Panulirus_argus_Reverse_Primer_1176	TCATCCTGACCCCTGTAGTCC	907
1177	TC(54)	Panulirus_argus_Forward_Primer_1177	CACGCTAGTATCTGTGTCAGTTCG	Panulirus_argus_Reverse_Primer_1177	GAGCCATCTGGACTTGAGAGC	908
1178	TG(18)	Panulirus_argus_Forward_Primer_1178	CAGCAAATGAGTTCGTAAAGGC	Panulirus_argus_Reverse_Primer_1178	GACACGCACTCCTCATACGG	909
1179	AG(18)	Panulirus_argus_Forward_Primer_1179	AGAGTGAGGCAAAAGGCAGC	Panulirus_argus_Reverse_Primer_1179	TGTCGCACTTCATATTCCGC	910
1180	TG(28)	Panulirus_argus_Forward_Primer_1180	ACGATGGCTTGACTGACTGG	Panulirus_argus_Reverse_Primer_1180	GGGTCAGTTTACTGGCGTCG	911
1181	TG(14)	Panulirus_argus_Forward_Primer_1181	TGTCTGTCTTTCCTTGCCTGC	Panulirus_argus_Reverse_Primer_1181	CTGTGACGTCTTGAGTCGGG	912
1182	TG(34)	Panulirus_argus_Forward_Primer_1182	TTCAGATGACTTTGCCCCG	Panulirus_argus_Reverse_Primer_1182	GGCTACGATGGATGCAGAGC	913
1183	TG(14)	Panulirus_argus_Forward_Primer_1183	GCTTTGAAGGTCCAAACAAGC	Panulirus_argus_Reverse_Primer_1183	GTCAAGCTGGTGTTGTCACG	914
1184	TG(12)	Panulirus_argus_Forward_Primer_1184	GTGTAGGAGTGCGTTTGTTTGG	Panulirus_argus_Reverse_Primer_1184	TACCACAATTATGCATGCAACG	915
1185	TG(12)	Panulirus_argus_Forward_Primer_1185	CCACAAACCTCAAGCAGACG	Panulirus_argus_Reverse_Primer_1185	TGCATCAGAGTGAAAGAACTGG	916
1186	AT(12)	Panulirus_argus_Forward_Primer_1186	AGTGCAGGCACACACATTCC	Panulirus_argus_Reverse_Primer_1186	AAATGGTTGCTGTCTCAGCC	917
1187	TC(20)	Panulirus_argus_Forward_Primer_1187	CCAAAACTCCTGGGTAACCG	Panulirus_argus_Reverse_Primer_1187	GATACCCAGAACCTCCTCGC	918
1188	AT(30)	Panulirus_argus_Forward_Primer_1188	TACAGCATCAAGCGCTTTCG	Panulirus_argus_Reverse_Primer_1188	TCTCCAAGAAATCTTGTTCAATCC	919
1189	AT(26)	Panulirus_argus_Forward_Primer_1189	GGTCGGTGAAGCTAACCCC	Panulirus_argus_Reverse_Primer_1189	ATACTGCACCATCAAACGGC	920
1190	TG(40)	Panulirus_argus_Forward_Primer_1190	TTATTACCGGAGACCCCTCG	Panulirus_argus_Reverse_Primer_1190	GCCTGTGAATTGTGAGTGCG	921
1191	TG(30)	Panulirus_argus_Forward_Primer_1191	TCCCCGTTCATTTTCTAACACC	Panulirus_argus_Reverse_Primer_1191	GGGAAAGCTGAACGTTTTGG	922
1192	AG(12)	Panulirus_argus_Forward_Primer_1192	TCAGCAGGCTATCCTGACCC	Panulirus_argus_Reverse_Primer_1192	TATTCCATTATGGCCGAGGG	923
1193	AT(40)	Panulirus_argus_Forward_Primer_1193	GTTCAGAACCATGCAGGTGG	Panulirus_argus_Reverse_Primer_1193	TGATCCTGGAACGTTTGGC	924
1194	TG(20)	Panulirus_argus_Forward_Primer_1194	TGAAGTTTATGAATATTTCCGGGC	Panulirus_argus_Reverse_Primer_1194	TCAGAAATGTGAAGATTTTCAGTCG	925
1195	AG(14)	Panulirus_argus_Forward_Primer_1195	CGTTCATAAGTCGGAGACGC	Panulirus_argus_Reverse_Primer_1195	AGGAACATAGCAAGGAGCCG	926
1196	AT(68)	Panulirus_argus_Forward_Primer_1196	GAAGTTTGGCCGTAAATTCTGG	Panulirus_argus_Reverse_Primer_1196	GCAACTTTCTCACTACAGATGCC	927
1197	AG(22)	Panulirus_argus_Forward_Primer_1197	TGTACTCTATATAATGAACGCTTAATGGC	Panulirus_argus_Reverse_Primer_1197	CTTACGCTGATGATTCGGGG	928
1198	TG(12)	Panulirus_argus_Forward_Primer_1198	GGATAAACAATGAAGGCTTTGG	Panulirus_argus_Reverse_Primer_1198	ACGTGAGTCGACAGAGCTGG	929
1199	TG(24)	Panulirus_argus_Forward_Primer_1199	TTGGGAAACGTACTTTGGGG	Panulirus_argus_Reverse_Primer_1199	GATAGGTAGGATGCAGCGCC	930
1200	TG(44)	Panulirus_argus_Forward_Primer_1200	ACAGACGCGGACATTCACC	Panulirus_argus_Reverse_Primer_1200	TCGTGGTAATACCTTGCCAGC	931
1201	TG(34)	Panulirus_argus_Forward_Primer_1201	TAAAGGGCGAATCCTTAGCG	Panulirus_argus_Reverse_Primer_1201	GTGCAAGGCAGCTTGTATCG	932
1202	AG(22)	Panulirus_argus_Forward_Primer_1202	ATACTGCATTGATGCCTCGG	Panulirus_argus_Reverse_Primer_1202	AGCTCACAACGTGTTCTGCC	933
1203	TG(16)	Panulirus_argus_Forward_Primer_1203	CTCCACACTTGGCAATACGC	Panulirus_argus_Reverse_Primer_1203	GTTCTGGGAACACTGCCTCG	934
1204	TG(16)	Panulirus_argus_Forward_Primer_1204	GTGATGAGGAGGTTGGAGGG	Panulirus_argus_Reverse_Primer_1204	CAATGAGCTCCAGGATGGC	935
1205	AG(12)	Panulirus_argus_Forward_Primer_1205	GCGGCTTTTCTCGTAATTGG	Panulirus_argus_Reverse_Primer_1205	TTGAATGCAAACACACCAGC	936
1206	AG(18)	Panulirus_argus_Forward_Primer_1206	TCACCCAGTCTTATGCCGC	Panulirus_argus_Reverse_Primer_1206	GGGAGGACTAGCACTCAGCG	937
1207	TG(20)	Panulirus_argus_Forward_Primer_1207	CGAGTGCATCACGACATAAGG	Panulirus_argus_Reverse_Primer_1207	ATTACGCTGACACTCGGTGC	938
1208	TG(12)	Panulirus_argus_Forward_Primer_1208	ATCGTGCGTTCCTACCATCC	Panulirus_argus_Reverse_Primer_1208	CTAACGTTCTCCCTGCTGGC	939
1209	AG(16)	Panulirus_argus_Forward_Primer_1209	GGTGGAATTTTAAGAGGAGGGG	Panulirus_argus_Reverse_Primer_1209	CATTTAACAAACCTCCCGGC	940
1210	TC(12)	Panulirus_argus_Forward_Primer_1210	GACACTCACCCTTATGGCCC	Panulirus_argus_Reverse_Primer_1210	TCTAGGCACTCCATCAACGC	941
1211	TG(18)	Panulirus_argus_Forward_Primer_1211	TCCAGTGTTTACGACGTGAGG	Panulirus_argus_Reverse_Primer_1211	CTTGCAAGTTCAAGCTGGG	942
1212	AG(12)	Panulirus_argus_Forward_Primer_1212	CGAGTAAAGCGAAGGATGGG	Panulirus_argus_Reverse_Primer_1212	GACCCAGGGACAGACACTCC	943
1213	AG(44)	Panulirus_argus_Forward_Primer_1213	TTGAGTCACAACACTGGAAAGC	Panulirus_argus_Reverse_Primer_1213	GCGGGTATCTACCAAATCACG	944
1214	AG(36)	Panulirus_argus_Forward_Primer_1214	TCCCCTCACCTCATAATCCC	Panulirus_argus_Reverse_Primer_1214	GCTCATACTAGGCCTCTGGGG	945
1215	AT(14)	Panulirus_argus_Forward_Primer_1215	GGTCTGCTTTGGTATCTGCG	Panulirus_argus_Reverse_Primer_1215	TTGATAAGGCTGACCCTCGG	946
1216	TG(14)	Panulirus_argus_Forward_Primer_1216	GGGGTACCTCTCACCCACC	Panulirus_argus_Reverse_Primer_1216	TACCATCTCCTGACGAGGGG	947
1217	AG(36)	Panulirus_argus_Forward_Primer_1217	TGTCTAGTGAGTGTGTGCGGC	Panulirus_argus_Reverse_Primer_1217	CTCGTGGACTTTTCAGCTCG	948
1218	AG(46)	Panulirus_argus_Forward_Primer_1218	CTGTATTACCTCCTGAAGGACAGC	Panulirus_argus_Reverse_Primer_1218	CGTATCGCCTTTCATAGCTGG	949
1219	TG(22)	Panulirus_argus_Forward_Primer_1219	GGGCAGTGTGAAACTGTTGG	Panulirus_argus_Reverse_Primer_1219	CGGCCATAAATCACCTCCC	950
1220	AG(40)	Panulirus_argus_Forward_Primer_1220	CCAGCGTGTATACCTCACATGC	Panulirus_argus_Reverse_Primer_1220	TCACGCTGTACTCCAAACCG	951
1221	TC(12)	Panulirus_argus_Forward_Primer_1221	CGGTATTACCACAGAACTGGAGG	Panulirus_argus_Reverse_Primer_1221	TCTCCCTATTTCTAAGTTTCACCG	952
1222	AG(20)	Panulirus_argus_Forward_Primer_1222	CCTCTGTAGTATTTCAGCCACAGC	Panulirus_argus_Reverse_Primer_1222	TTGCAGAAGCAGCTGAATGG	953
1223	AG(54)	Panulirus_argus_Forward_Primer_1223	TCGCTTTCTAGCTCTCATTGTCC	Panulirus_argus_Reverse_Primer_1223	GAACTTTCATCCTCACAGTGGC	954
1224	TG(30)	Panulirus_argus_Forward_Primer_1224	CGTACCTTGTGTTTATGCCCG	Panulirus_argus_Reverse_Primer_1224	GAAGGCGTCGTAATGGTTGG	955
1225	TG(16)	Panulirus_argus_Forward_Primer_1225	TCATAACCAGTTCTGTGAGGGG	Panulirus_argus_Reverse_Primer_1225	AGCGATATGGGTGTGTGACG	956
1226	TG(40)	Panulirus_argus_Forward_Primer_1226	TGTGGTACGGACGAAGATGC	Panulirus_argus_Reverse_Primer_1226	GAAGGAACATCCCAAGGTCG	957
1227	AT(42)	Panulirus_argus_Forward_Primer_1227	GAAATGTAAGTAGATCCAAACTGAGAGC	Panulirus_argus_Reverse_Primer_1227	TCCCATCGGAATAAATCTGTAGG	958
1228	TG(28)	Panulirus_argus_Forward_Primer_1228	GTACCGCCATCTATCACGGG	Panulirus_argus_Reverse_Primer_1228	GAAACCATAATTCTCGGCAGG	959
1229	TG(26)	Panulirus_argus_Forward_Primer_1229	TTGAACTCATGCAACCATTCG	Panulirus_argus_Reverse_Primer_1229	ATCCCTGTCAAGCCTCTTGC	960
1230	TG(24)	Panulirus_argus_Forward_Primer_1230	ACCGTTAATGTAGCCGTCCC	Panulirus_argus_Reverse_Primer_1230	TCCATTTTCTCCCCTCTCCC	961
1231	AG(60)	Panulirus_argus_Forward_Primer_1231	ATACAATCACACTGGCCCCG	Panulirus_argus_Reverse_Primer_1231	CGTGGTGTGTTGCTGTTGG	962
1232	AT(50)	Panulirus_argus_Forward_Primer_1232	AGTGTTCGTGGTACCGATGG	Panulirus_argus_Reverse_Primer_1232	TCGAAAATGGAAAATCAGTGG	963
1233	AT(12)	Panulirus_argus_Forward_Primer_1233	TGTGTTTAGGGTCAAACACTTACACC	Panulirus_argus_Reverse_Primer_1233	GGTTTGTACAGAGGGAAGGGG	964
1234	AG(62)	Panulirus_argus_Forward_Primer_1234	ACTGCTGTCCCGTTGTCAGG	Panulirus_argus_Reverse_Primer_1234	CGGAGTCTGTGTCGACTTGC	965
1235	AG(12)	Panulirus_argus_Forward_Primer_1235	TGTCATGACGGGGTGTAAGG	Panulirus_argus_Reverse_Primer_1235	GAGGCTGTTTGCCGTAGTGG	966
1236	AG(72)	Panulirus_argus_Forward_Primer_1236	AAGACAGGTGTGAAAAGATGAAGG	Panulirus_argus_Reverse_Primer_1236	CCTCTTGGAGGCCATAGTGC	967
1237	TG(28)	Panulirus_argus_Forward_Primer_1237	TGCTAGTAATGGCACACCCG	Panulirus_argus_Reverse_Primer_1237	TCAGGTGGTTCTTCCAGTCG	968
1238	TG(40)	Panulirus_argus_Forward_Primer_1238	TGTCTATCTATACCCCGGCCC	Panulirus_argus_Reverse_Primer_1238	CCGCTCATCTCAGTGTCTGC	969
1239	TG(52)	Panulirus_argus_Forward_Primer_1239	CACCTATCTAATGCCGTGCG	Panulirus_argus_Reverse_Primer_1239	ACACCCTCATGCCTACCTGC	970
1240	AG(14)	Panulirus_argus_Forward_Primer_1240	TTTCTCCCAAGATATGAGCCG	Panulirus_argus_Reverse_Primer_1240	TCATTCACTGGCTTTCTCTGC	971
1241	TG(28)	Panulirus_argus_Forward_Primer_1241	GGCAACCAGAGCAAGTCTACC	Panulirus_argus_Reverse_Primer_1241	AACCAGGTGGACTGAGAGCC	972
1242	TG(12)	Panulirus_argus_Forward_Primer_1242	TGTGTCATATCTCACCTCCCTCC	Panulirus_argus_Reverse_Primer_1242	CACGAGACGGTAATACGGGG	973
1243	AG(12)	Panulirus_argus_Forward_Primer_1243	CTGCGTGGAAACATGACTGG	Panulirus_argus_Reverse_Primer_1243	CGTGGCTCCTCTTACCAAGG	974
1244	AG(76)	Panulirus_argus_Forward_Primer_1244	CTTGCACCTCCTCCATTTGC	Panulirus_argus_Reverse_Primer_1244	GACTGAGGACCACACAAGCG	975
1245	AG(20)	Panulirus_argus_Forward_Primer_1245	CCGGTGTAGGAGGATGTGG	Panulirus_argus_Reverse_Primer_1245	TTATCTCATGCGTGGATTGG	976
1246	AG(18)	Panulirus_argus_Forward_Primer_1246	ACTGACTGTACCCGTCTGCG	Panulirus_argus_Reverse_Primer_1246	GATCCACAACTCCTCCACCC	977
1247	AG(12)	Panulirus_argus_Forward_Primer_1247	GTATGCGCCTCTTGAACACG	Panulirus_argus_Reverse_Primer_1247	CACATGTACGGAGACGGACG	978
1248	TG(20)	Panulirus_argus_Forward_Primer_1248	ACACCAAGACGTCCACTCCC	Panulirus_argus_Reverse_Primer_1248	AAGGGTGGCTTTTCACTTGC	979
1249	AG(26)	Panulirus_argus_Forward_Primer_1249	GTAGAAAGGTAGCGGTGGTGG	Panulirus_argus_Reverse_Primer_1249	GACTGACGAAGAAAAGCGCC	980
1250	TG(16)	Panulirus_argus_Forward_Primer_1250	GCGGTAAGTGGAGAGGCG	Panulirus_argus_Reverse_Primer_1250	TTACAACCGACCAACCAACC	981
1251	TG(22)	Panulirus_argus_Forward_Primer_1251	AGAAGACGAGGTGGGGTGG	Panulirus_argus_Reverse_Primer_1251	GATTCCTCGTGACTCATCGC	982
1252	TG(12)	Panulirus_argus_Forward_Primer_1252	CGGTGTCTCGGTGTCTGG	Panulirus_argus_Reverse_Primer_1252	ACTATCAATCAGCGCCCTCC	983
1253	AT(40)	Panulirus_argus_Forward_Primer_1253	AGCGGGACACACTCAAGAGG	Panulirus_argus_Reverse_Primer_1253	CTGTACTCCCAGTGACAAAGCC	984
1254	TG(32)	Panulirus_argus_Forward_Primer_1254	AGAGGGACAGCTTCAGGTCG	Panulirus_argus_Reverse_Primer_1254	CCCTCACTCGTAAAGCACACG	985
1255	AG(46)	Panulirus_argus_Forward_Primer_1255	GGAAGAAAAGTGTGTTGTGTTGG	Panulirus_argus_Reverse_Primer_1255	GGTAGGGAGGAGGAAAAGGG	986
1256	TG(14)	Panulirus_argus_Forward_Primer_1256	AATGGATGGGTGTTTGTTCG	Panulirus_argus_Reverse_Primer_1256	TTGCAGTTCCATGCGTTAGC	987
1257	AG(16)	Panulirus_argus_Forward_Primer_1257	AAACGCTTGAGAGCAAGTTCG	Panulirus_argus_Reverse_Primer_1257	TGTCTTGGTCATTGTTGTCATACG	988
1258	AT(12)	Panulirus_argus_Forward_Primer_1258	TTATTGCACTGGAGCGTTCG	Panulirus_argus_Reverse_Primer_1258	AATCGTCAGTTCTCCTGGGG	989
1259	TG(36)	Panulirus_argus_Forward_Primer_1259	TGAGTCCTCCATATATTTACCTCTGC	Panulirus_argus_Reverse_Primer_1259	CTTCAGTCAGGCAGGAACCC	990
1260	TG(22)	Panulirus_argus_Forward_Primer_1260	TTTTGATAGACGGGCAAGGC	Panulirus_argus_Reverse_Primer_1260	CCTGTCTAGCCACCAGAGCC	991
1261	AG(44)	Panulirus_argus_Forward_Primer_1261	CTGTCTATCTGTGTCTTTGTTCATCG	Panulirus_argus_Reverse_Primer_1261	TGGGGTGGGTGCAGTAGG	992
1262	TC(20)	Panulirus_argus_Forward_Primer_1262	TCAAATCTCCAAGGCGAAGG	Panulirus_argus_Reverse_Primer_1262	GTCGCTGCATTTTCCAAACG	993
1263	TC(22)	Panulirus_argus_Forward_Primer_1263	TAATTACTGGCAGGGGAGGG	Panulirus_argus_Reverse_Primer_1263	AGGGACTGATTGGATCTCGG	994
1264	TG(16)	Panulirus_argus_Forward_Primer_1264	CTCCAGTGTCGACCAGCG	Panulirus_argus_Reverse_Primer_1264	AGGCACAGCCTTAATGGGG	995
1265	TG(14)	Panulirus_argus_Forward_Primer_1265	CTTGAACGCACAAGTCCGC	Panulirus_argus_Reverse_Primer_1265	GCGGTTTAATATTGTAGGAAGCG	996
1266	TG(28)	Panulirus_argus_Forward_Primer_1266	GATTCACATCTGTAATTCCAATCCC	Panulirus_argus_Reverse_Primer_1266	TGTACTGGTGCCTGACTCGG	997
1267	AG(22)	Panulirus_argus_Forward_Primer_1267	GGAGCTCATGAAAATCATGTTGG	Panulirus_argus_Reverse_Primer_1267	TCGAGCCTGAAGAACACACG	998
1268	AG(22)	Panulirus_argus_Forward_Primer_1268	AACGGGACTGTGAGAGGACG	Panulirus_argus_Reverse_Primer_1268	ACCTAATTTTCGTCGCACGC	999
1269	TG(18)	Panulirus_argus_Forward_Primer_1269	TAAGCAGCAAGCAAACCACC	Panulirus_argus_Reverse_Primer_1269	TGTTGCAGGACTTTTAAGTGGG	1000
1270	TG(18)	Panulirus_argus_Forward_Primer_1270	TGATTGTTAACGCTGCCTCG	Panulirus_argus_Reverse_Primer_1270	GCCTCTTGATAGTGGCTGGG	1001
1271	TC(24)	Panulirus_argus_Forward_Primer_1271	CGCGCTTTCATCTCTTTCG	Panulirus_argus_Reverse_Primer_1271	ACTCCACATCAAGTCTTAAGTAATAGGG	1002
1272	TG(16)	Panulirus_argus_Forward_Primer_1272	AGGTGGGTCACGTCTCACG	Panulirus_argus_Reverse_Primer_1272	TGCACAATGAAGATTATACAGGGG	1003
1273	AG(16)	Panulirus_argus_Forward_Primer_1273	ACCTGGGATCTGGGGAGG	Panulirus_argus_Reverse_Primer_1273	CATACTCACATTTCCGCCCG	1004
1274	TG(12)	Panulirus_argus_Forward_Primer_1274	GTGTTTAGGTGGACCGTGCC	Panulirus_argus_Reverse_Primer_1274	TGCCTCACAAGGTAAAGATAAACG	1005
1275	TG(12)	Panulirus_argus_Forward_Primer_1275	CTTCCCTCGCTTTGAACACC	Panulirus_argus_Reverse_Primer_1275	CAACCCGTGCTGACTTATGG	1006
1276	AG(32)	Panulirus_argus_Forward_Primer_1276	ACATGGTATCGCATGTCACG	Panulirus_argus_Reverse_Primer_1276	TCAACACTTCACCTGGTGCC	1007
1277	AG(40)	Panulirus_argus_Forward_Primer_1277	TTGTGTAGATCTGTCCGGCG	Panulirus_argus_Reverse_Primer_1277	CGACAAATAAAAGAATATTCGAAACC	1008
1278	TG(38)	Panulirus_argus_Forward_Primer_1278	CAGCCGCACTTGATTACACG	Panulirus_argus_Reverse_Primer_1278	GATTGTTCCTGTAAGGCGGC	1009
1279	TG(14)	Panulirus_argus_Forward_Primer_1279	ATGCAACAGCGTCTACCAGC	Panulirus_argus_Reverse_Primer_1279	TTCGCGAGAGTGAATAGGGG	1010
1280	AG(16)	Panulirus_argus_Forward_Primer_1280	GAAGGGACTGGTACGTTGGG	Panulirus_argus_Reverse_Primer_1280	GAGGGAAACAATATCGAGGGG	1011
1281	AG(32)	Panulirus_argus_Forward_Primer_1281	CAACTTTACAAGAGACGACTACAGAACC	Panulirus_argus_Reverse_Primer_1281	TGCACTTAACACTCGTCCCG	1012
